# Supplementary material for: Rational Design, Synthesis, and Anti-Proliferative Evaluation of Novel 4-Aryl-3,4-Dihydro-2H-1,4-Benzoxazines
Source: MDPI journal article supplement (doi:10.3390/molecules29010166), 2023-12-27
Supplement: s1 [file s1]

2-(2-nitrophenoxy)-1-phenylethan-1-one (**3a**)

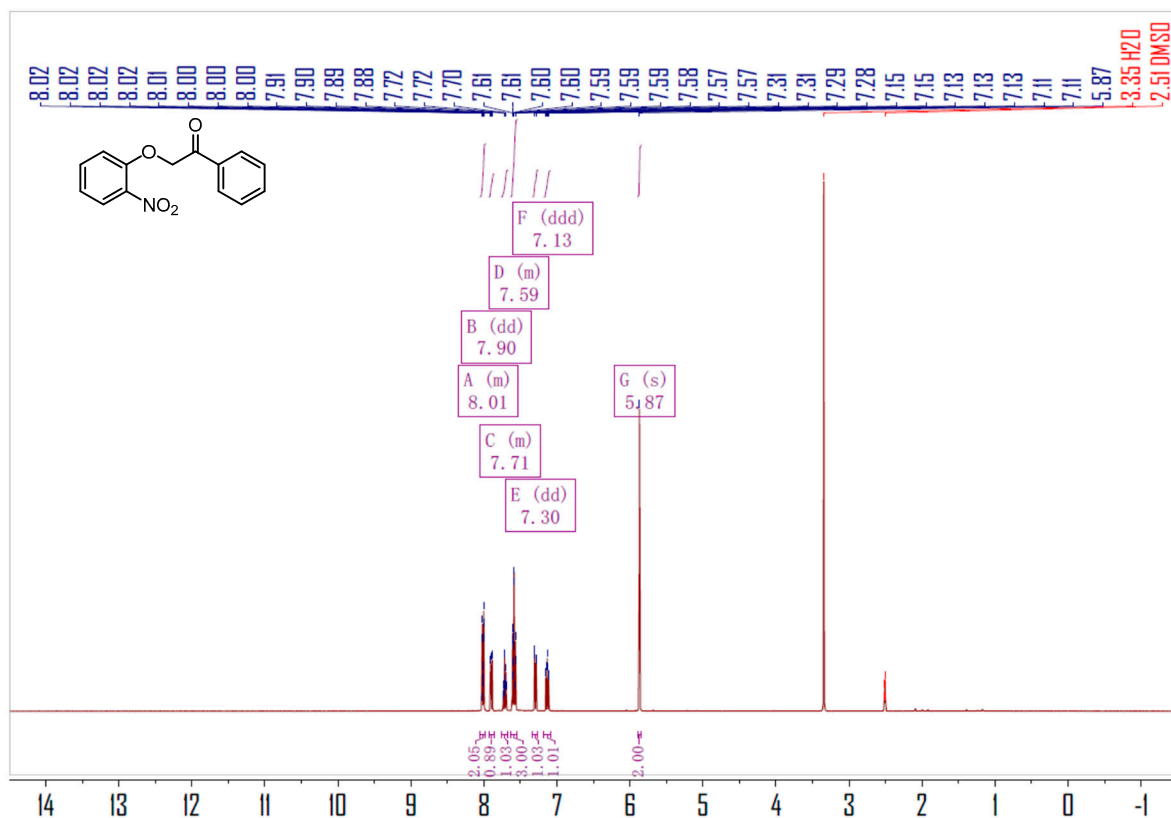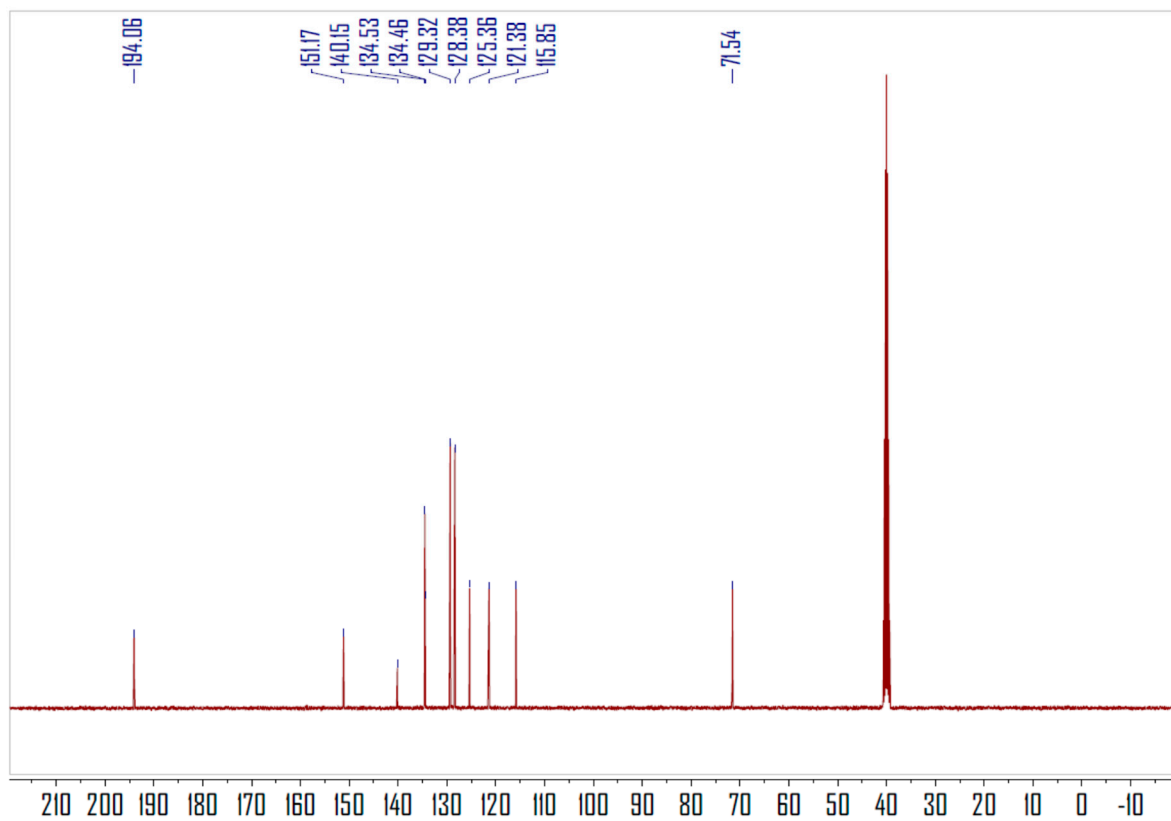

1-(4-methoxyphenyl)-2-(2-nitrophenoxy)ethan-1-one (**3b**)

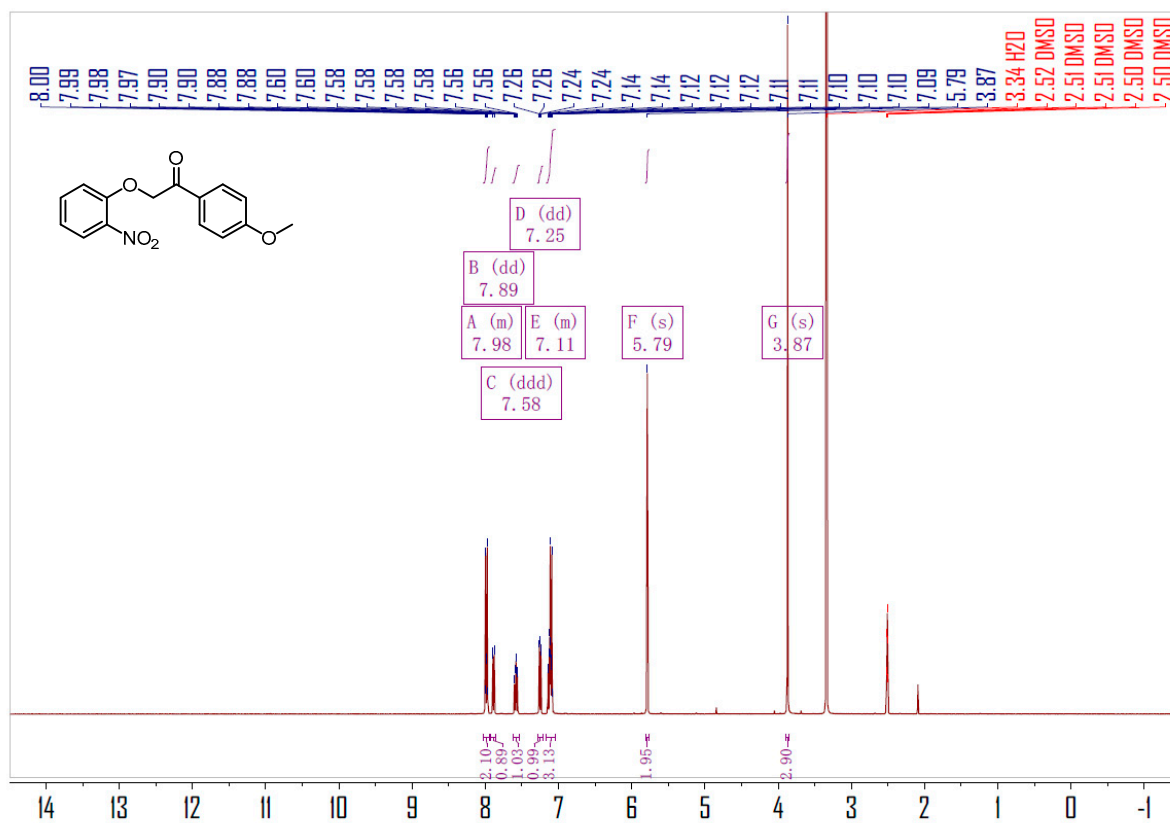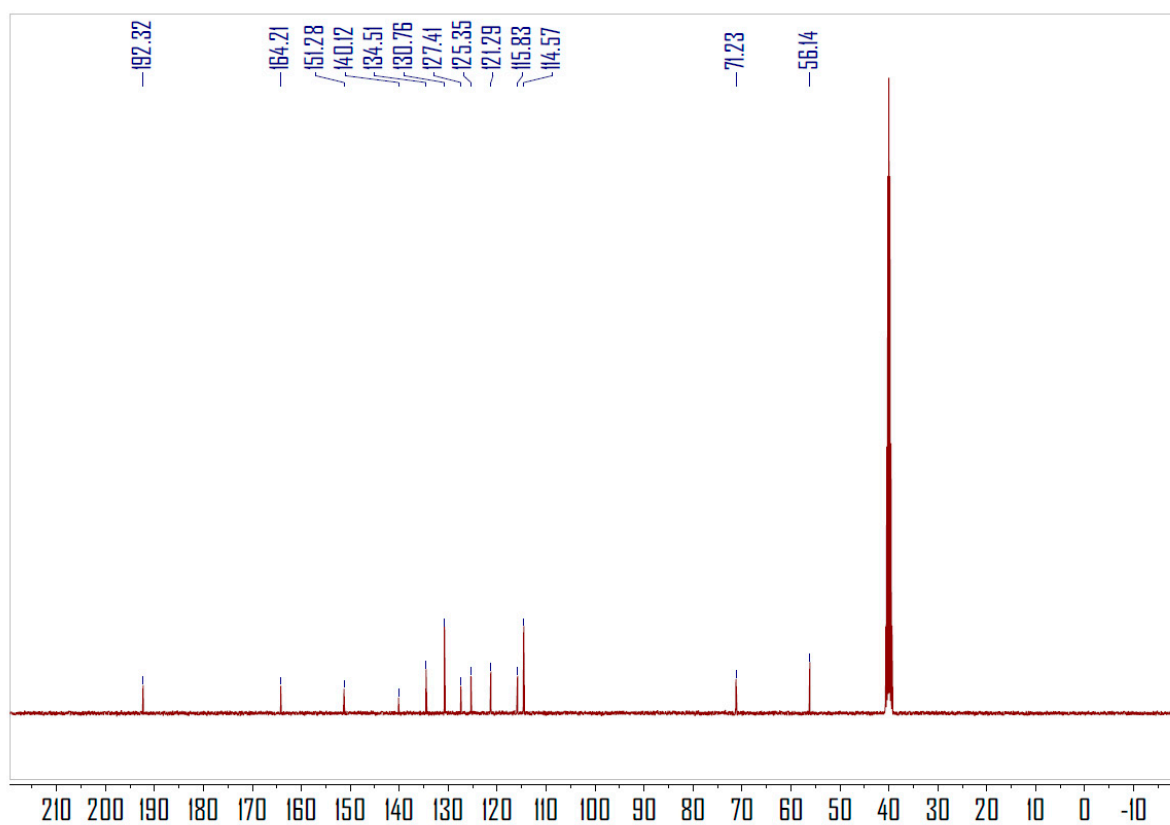

2-(5-methoxy-2-nitrophenoxy)-1-(4-methoxyphenyl)ethan-1-one (**8a**)

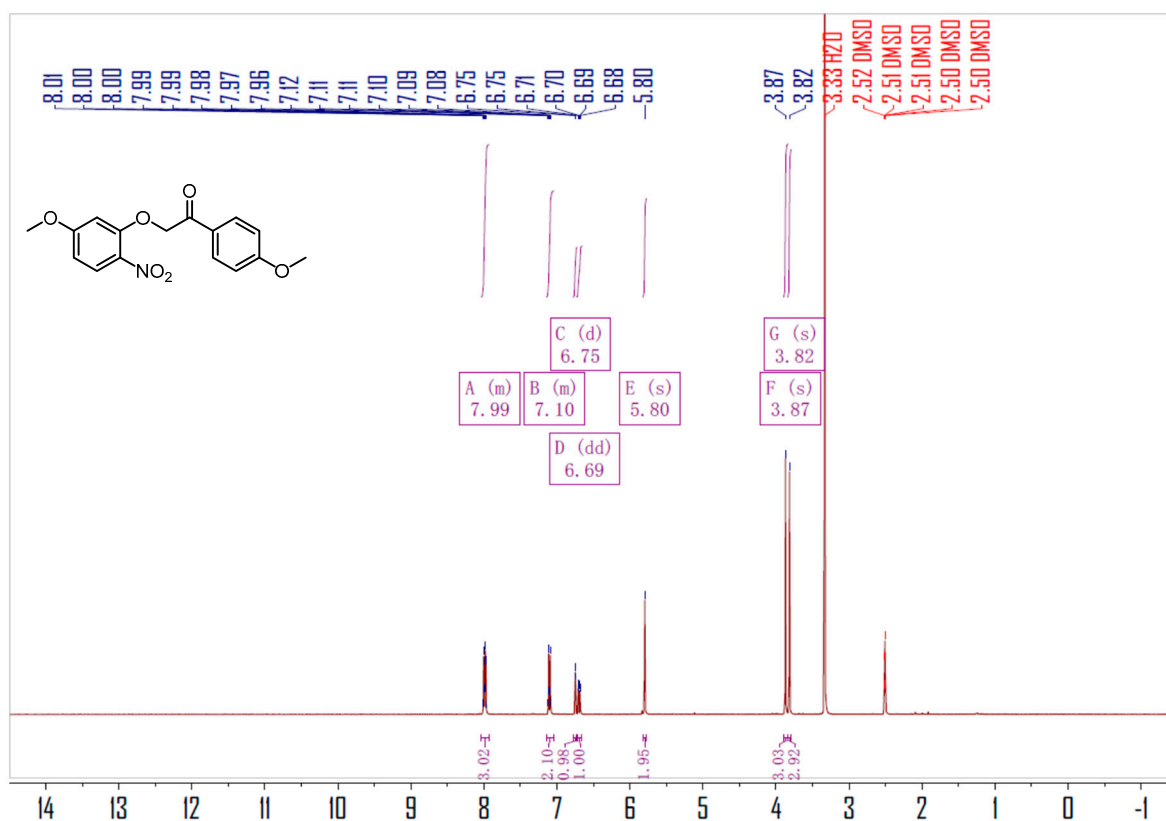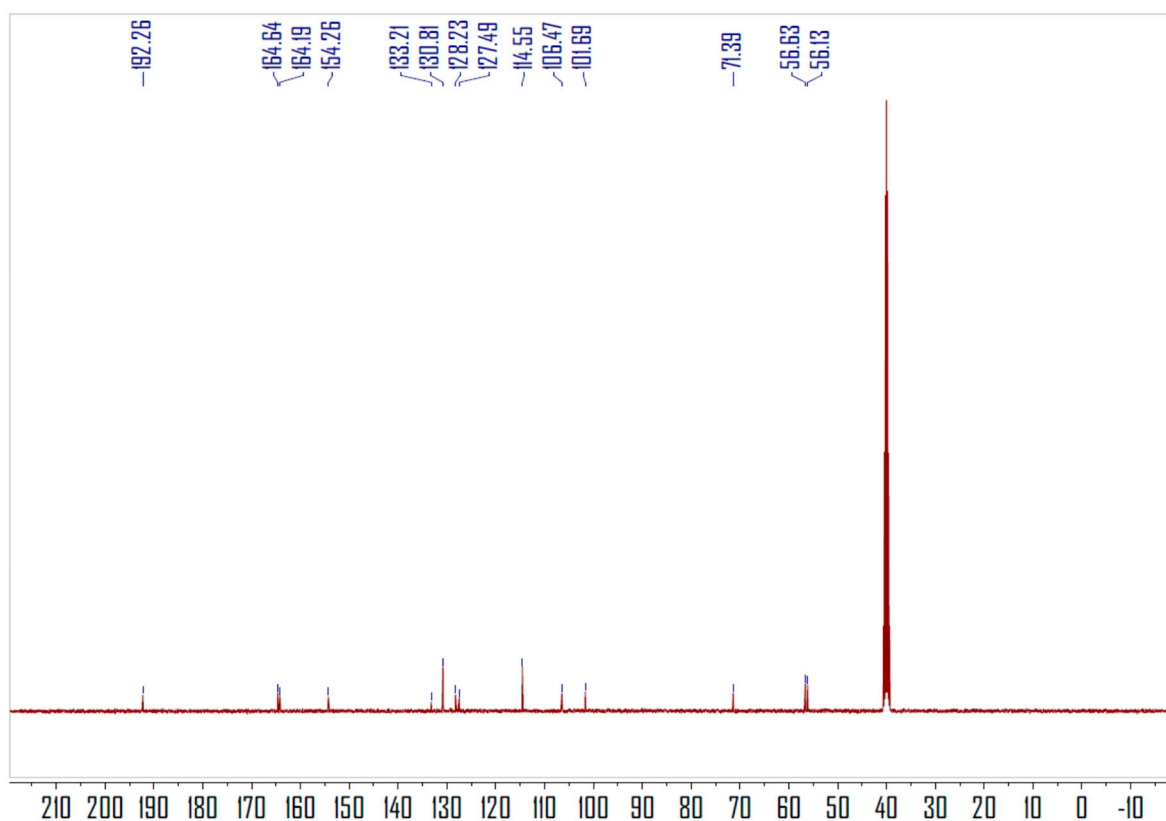

1-(2,4-dimethylphenyl)-2-(5-methoxy-2-nitrophenoxy)ethan-1-one (**8b**)

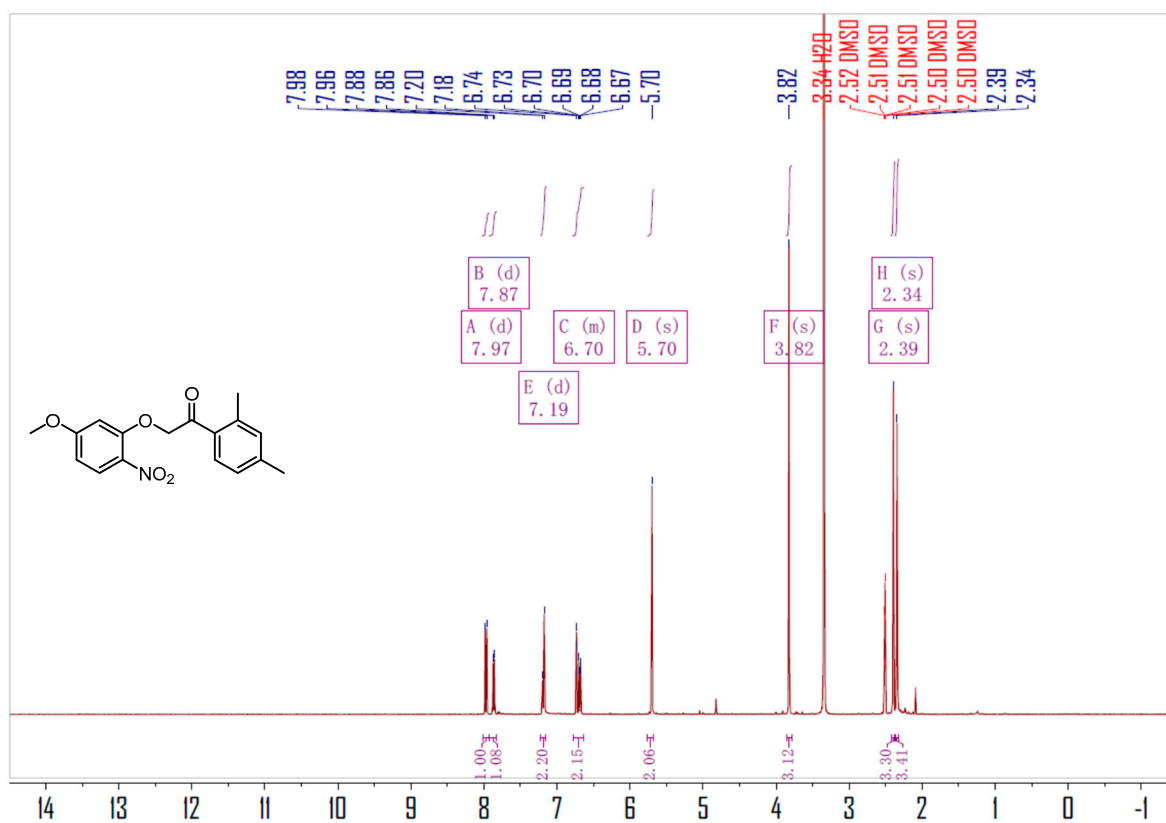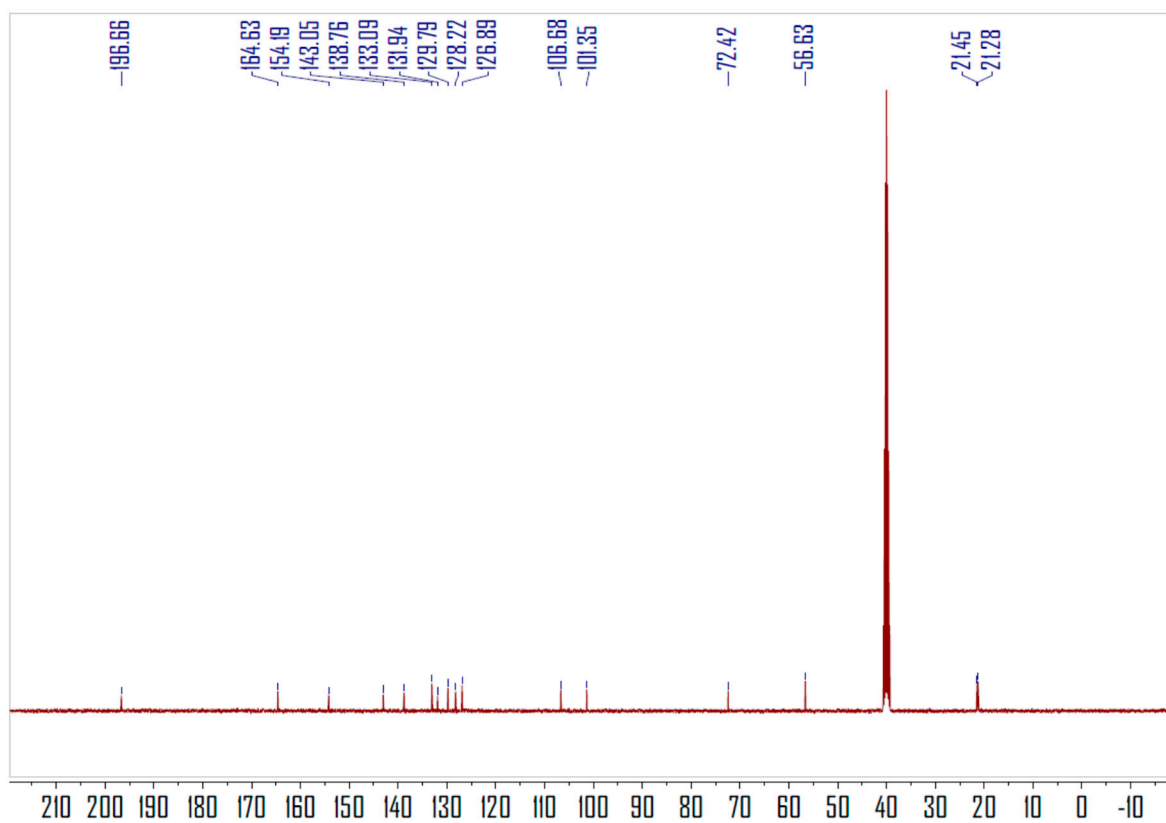



1-(4-fluorophenyl)-2-(5-methoxy-2-nitrophenoxy)ethan-1-one (**8c**)

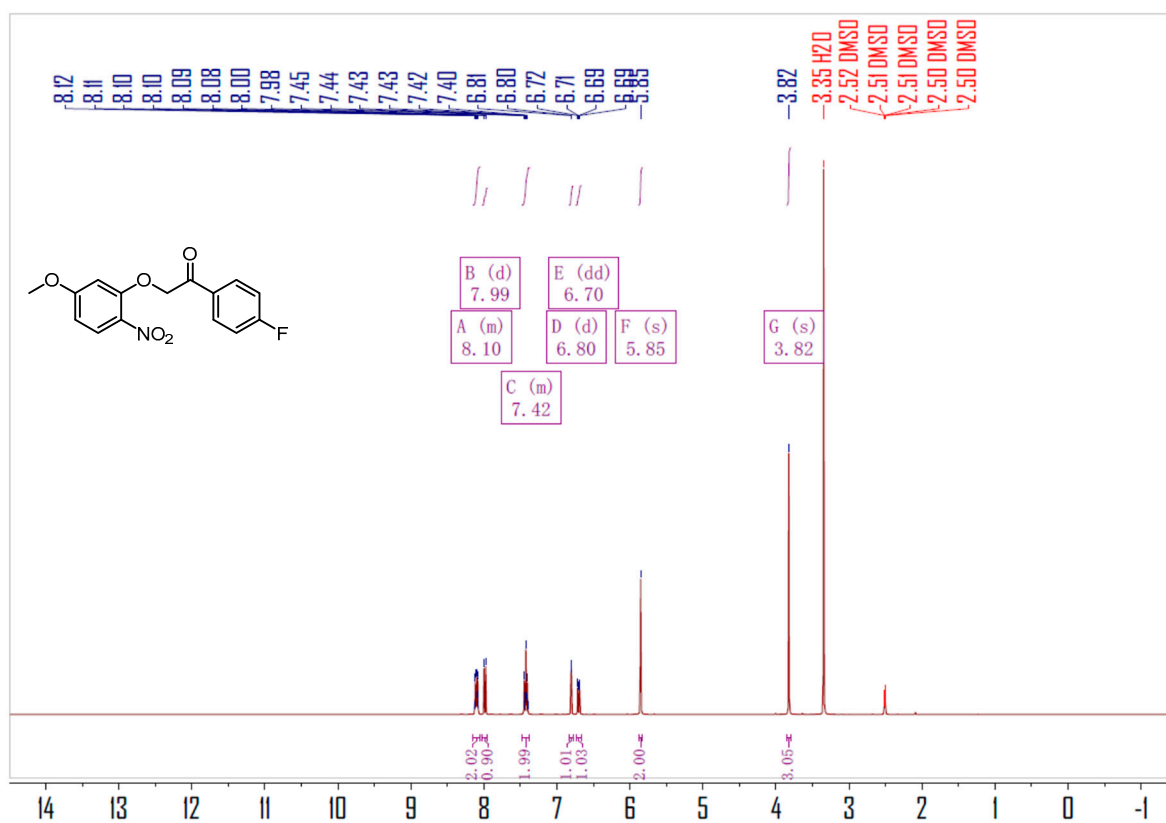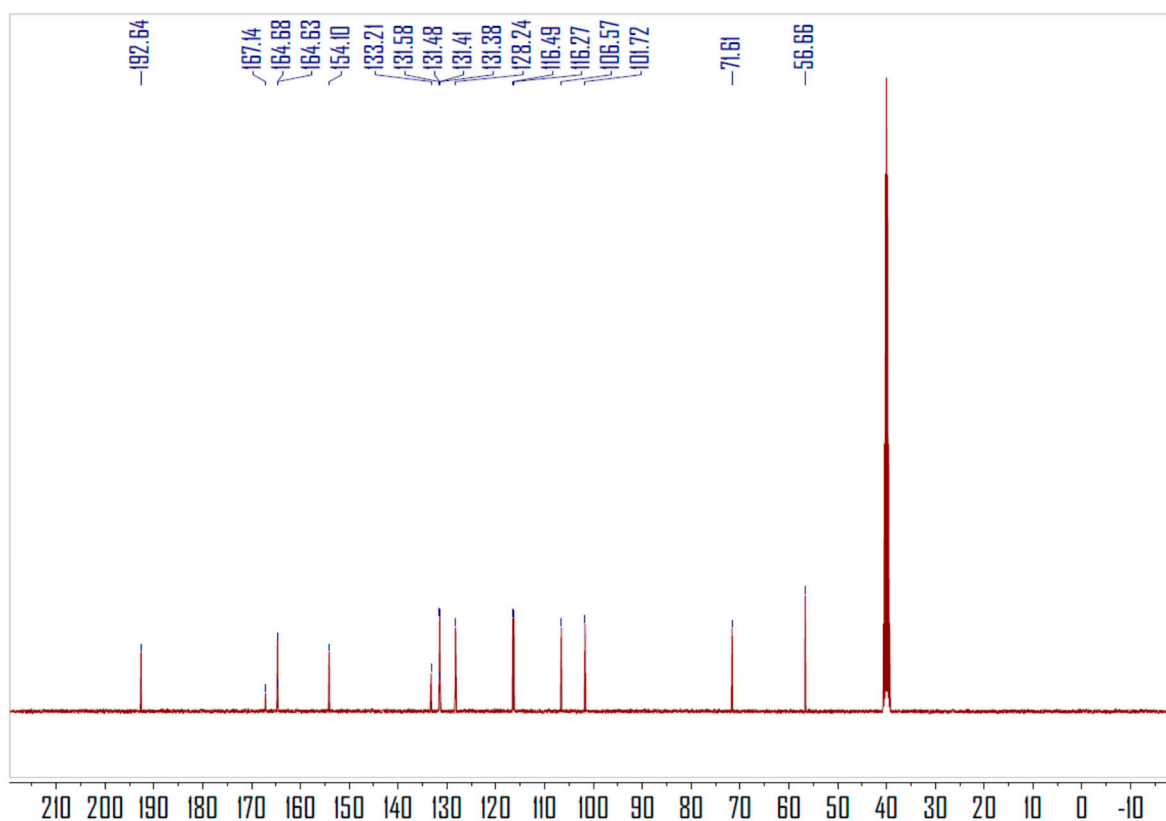

3-phenyl-3,4-dihydro-2H-benzo[b][1,4]oxazine (**4a**)

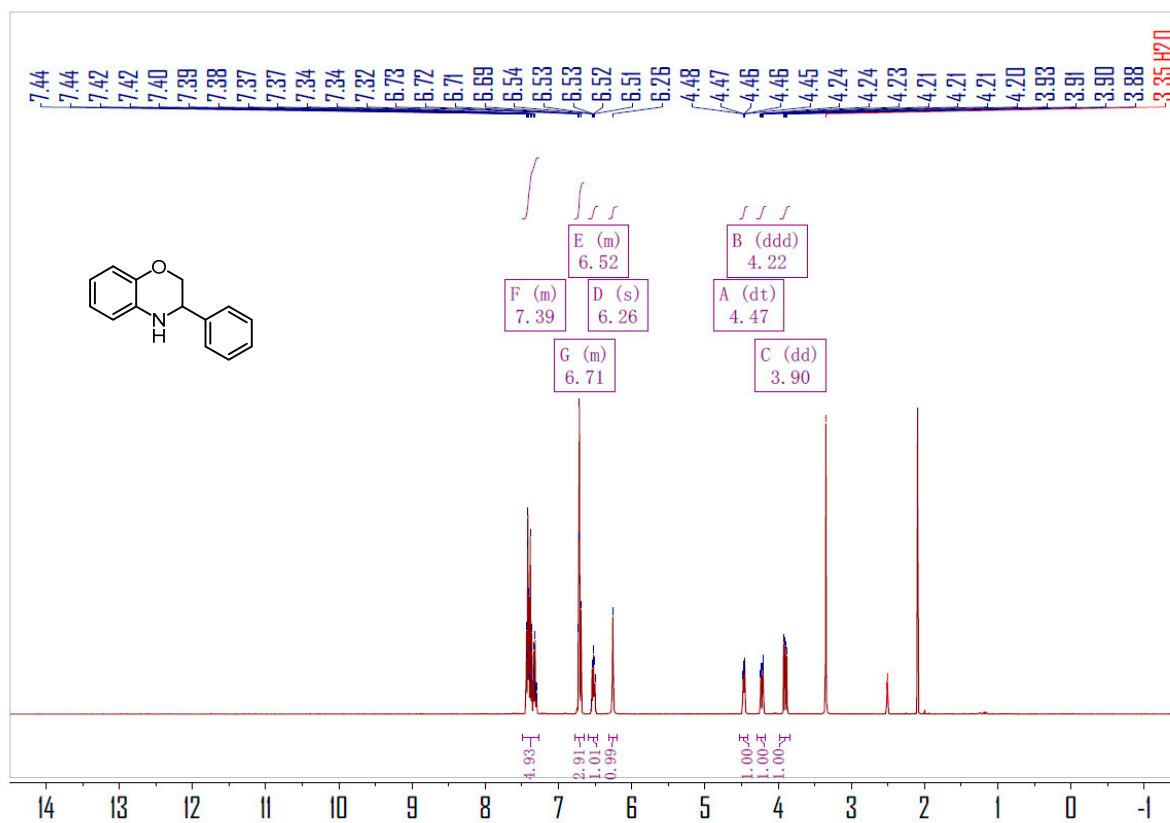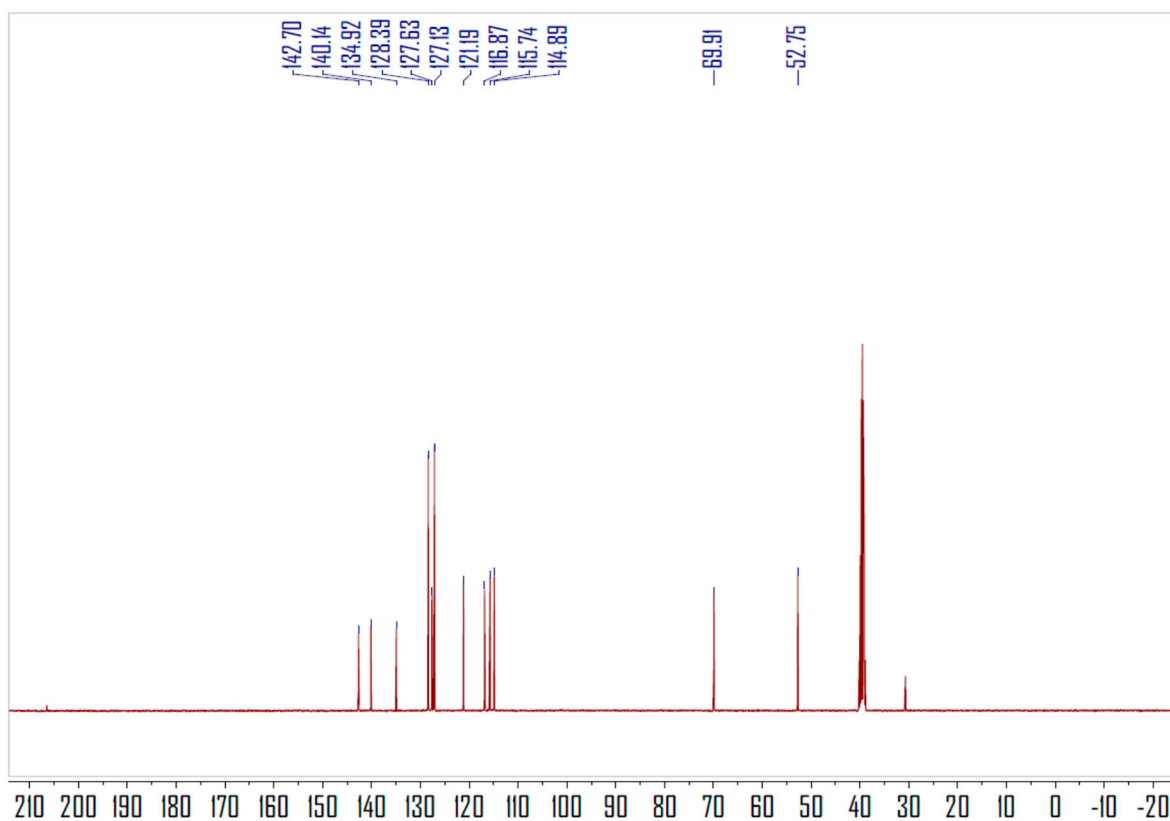

3-(4-methoxyphenyl)-3,4-dihydro-2H-benzo[b][1,4]oxazine (**4b**)

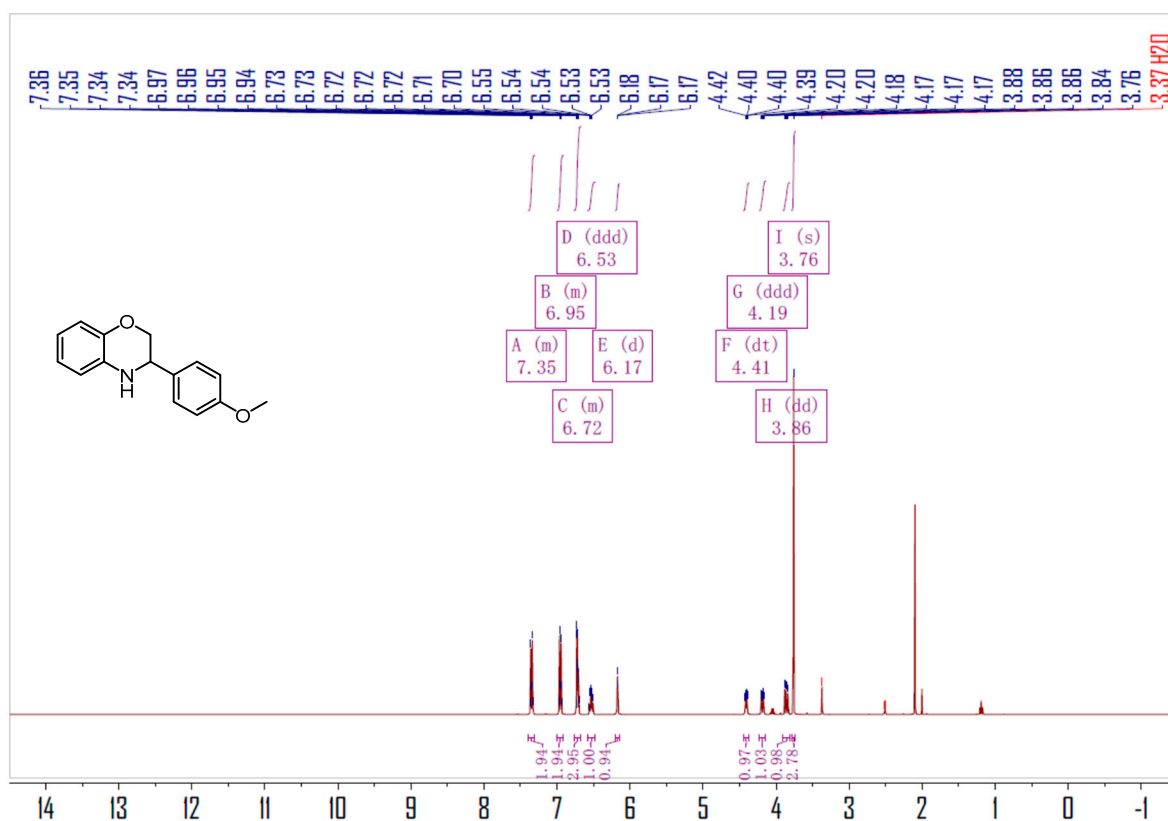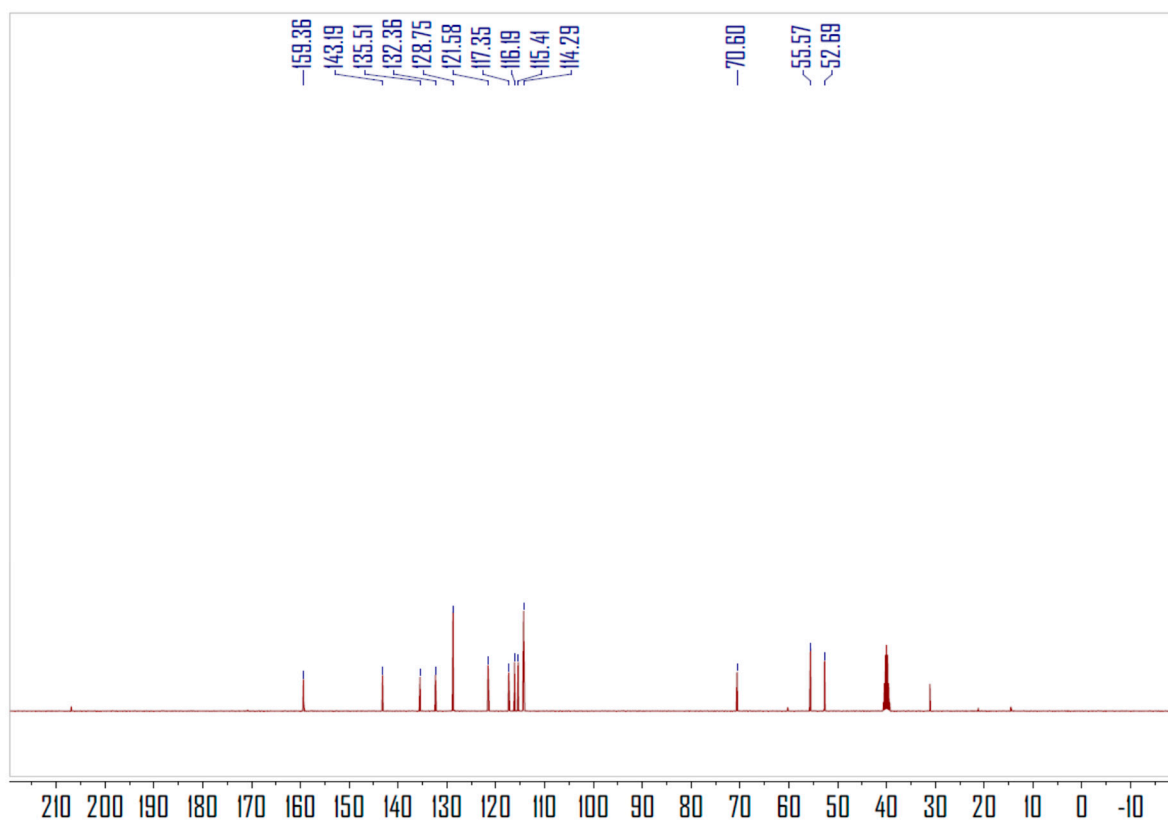

7-methoxy-3-(4-methoxyphenyl)-3,4-dihydro-2H-benzo[b][1,4]oxazine (**9a**)

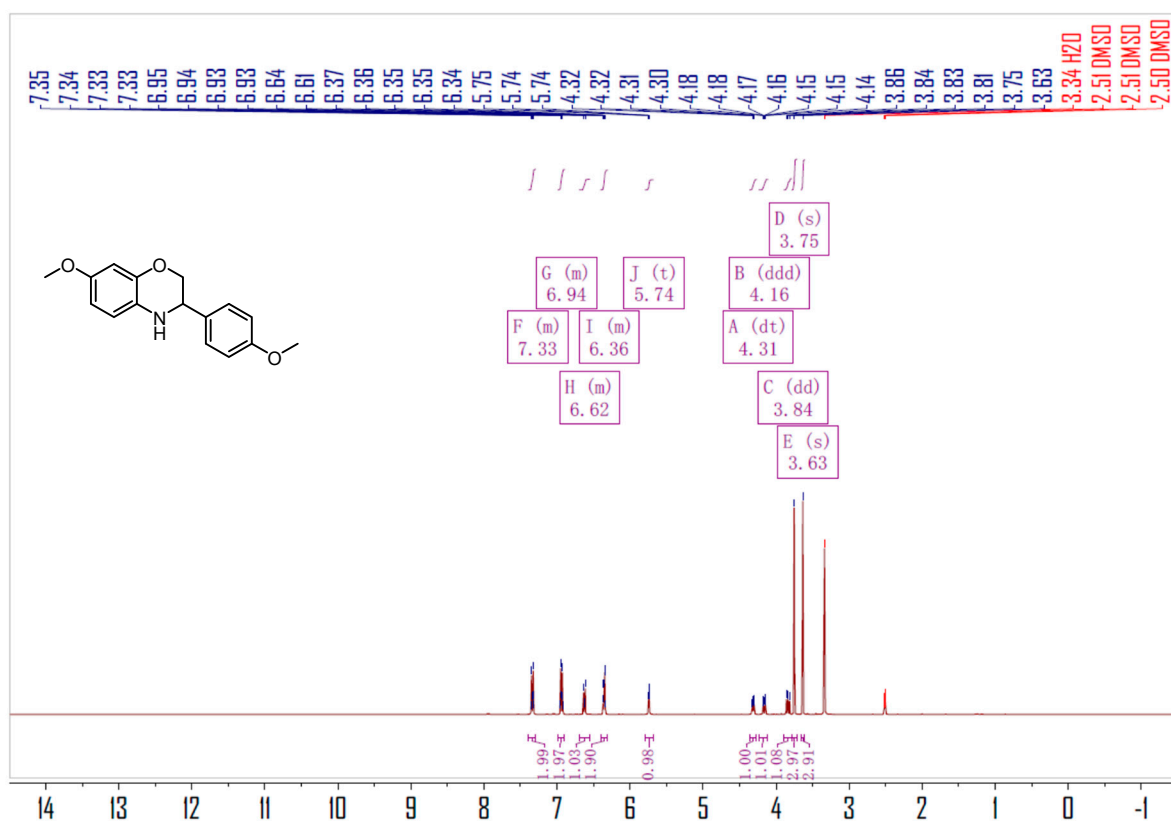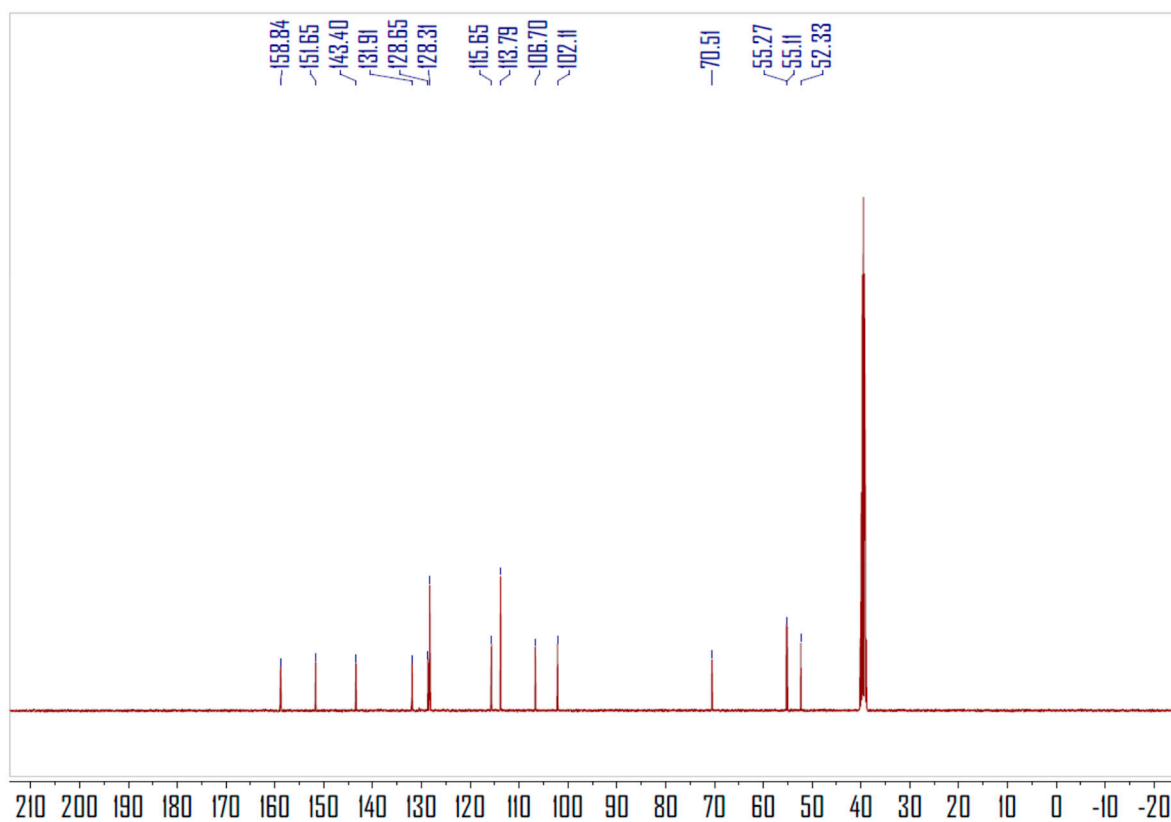

3-(2,4-dimethylphenyl)-7-methoxy-3,4-dihydro-2H-benzo[b][1,4]oxazine (**9b**)

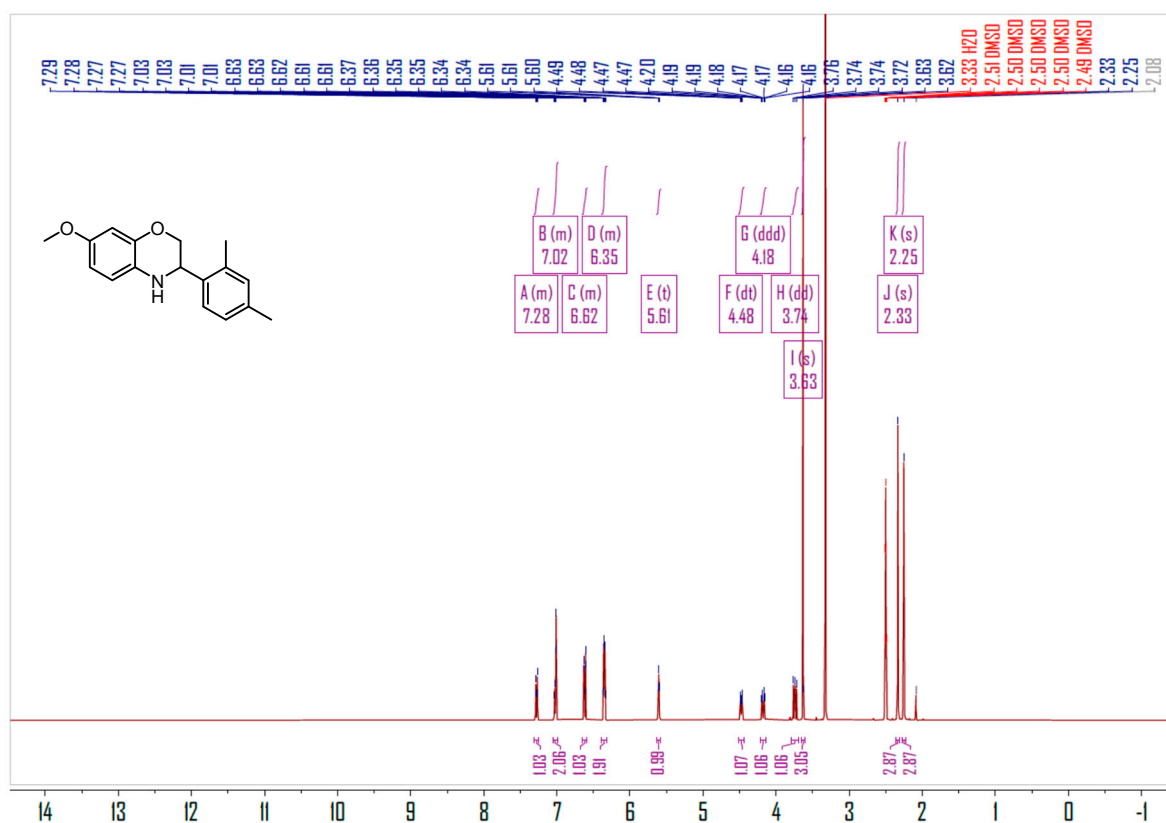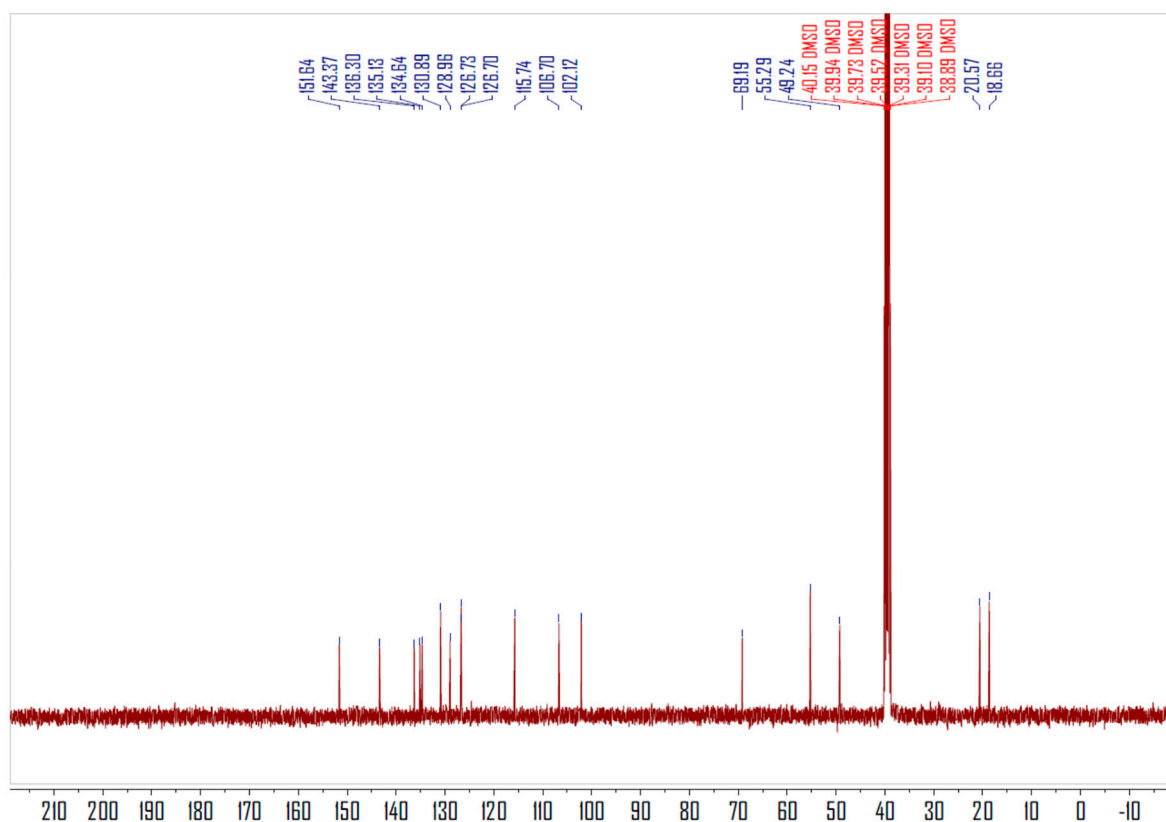

3-(4-fluorophenyl)-7-methoxy-3,4-dihydro-2H-benzo[b][1,4]oxazine (**9c**)

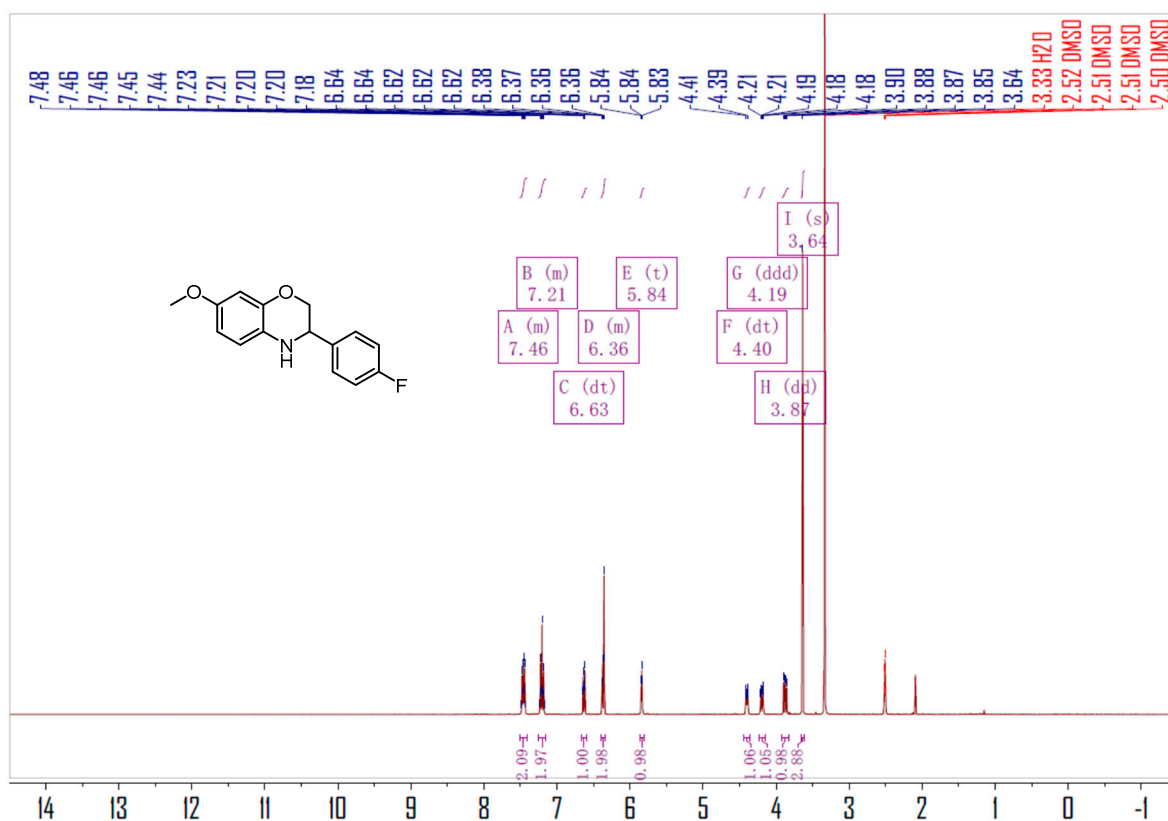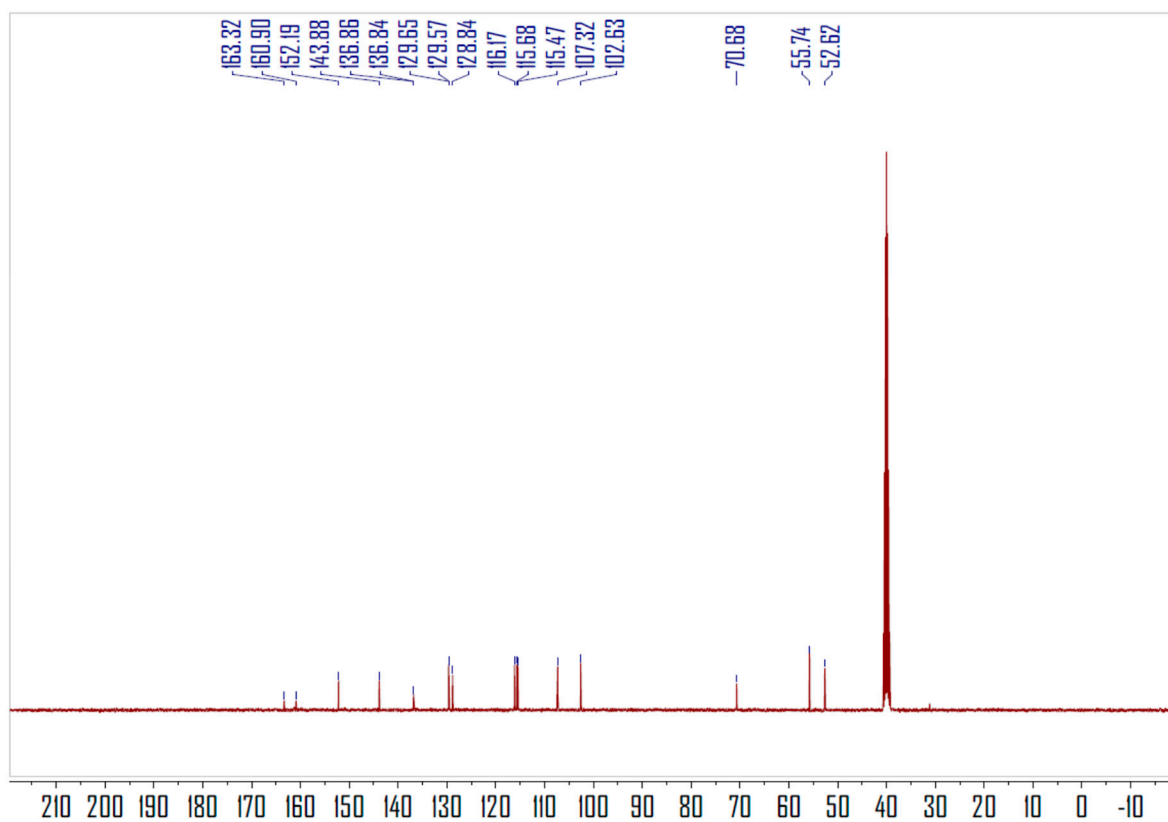

7-methoxy-3-(4-methoxyphenyl)-2H-benzo[b][1,4]oxazine (**10a**)

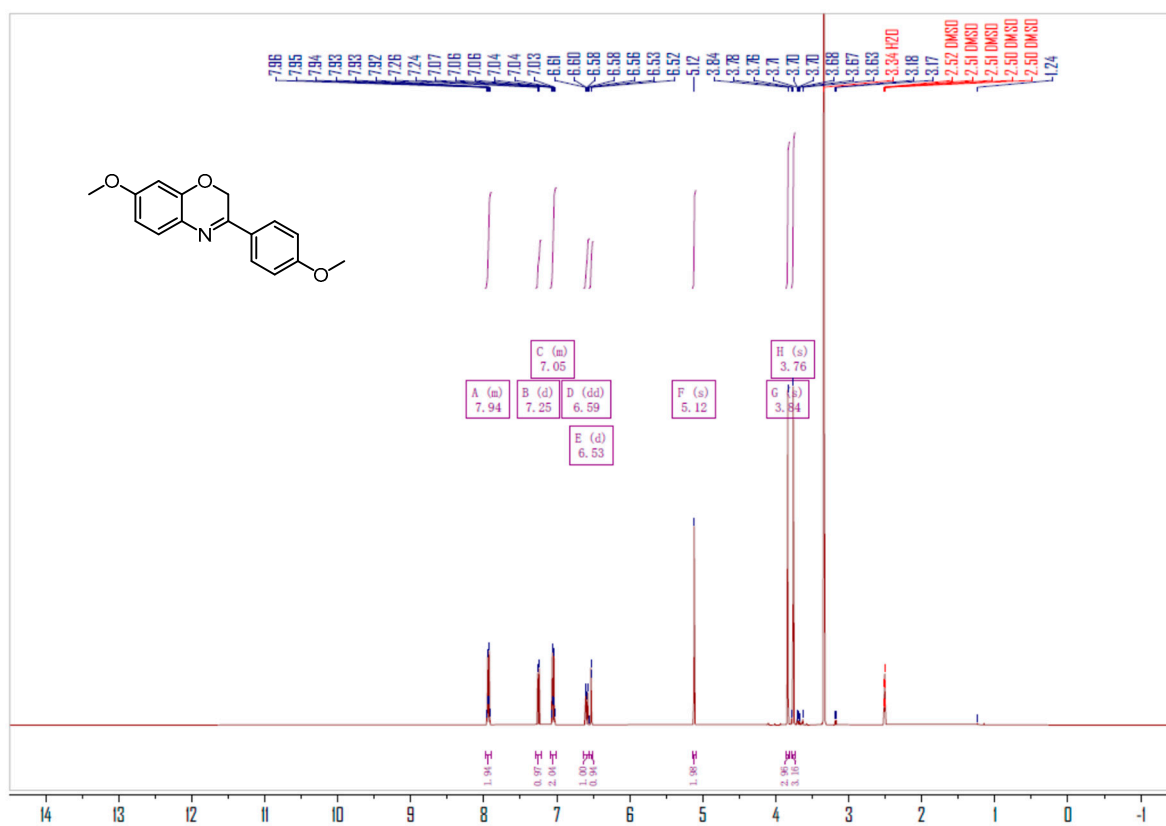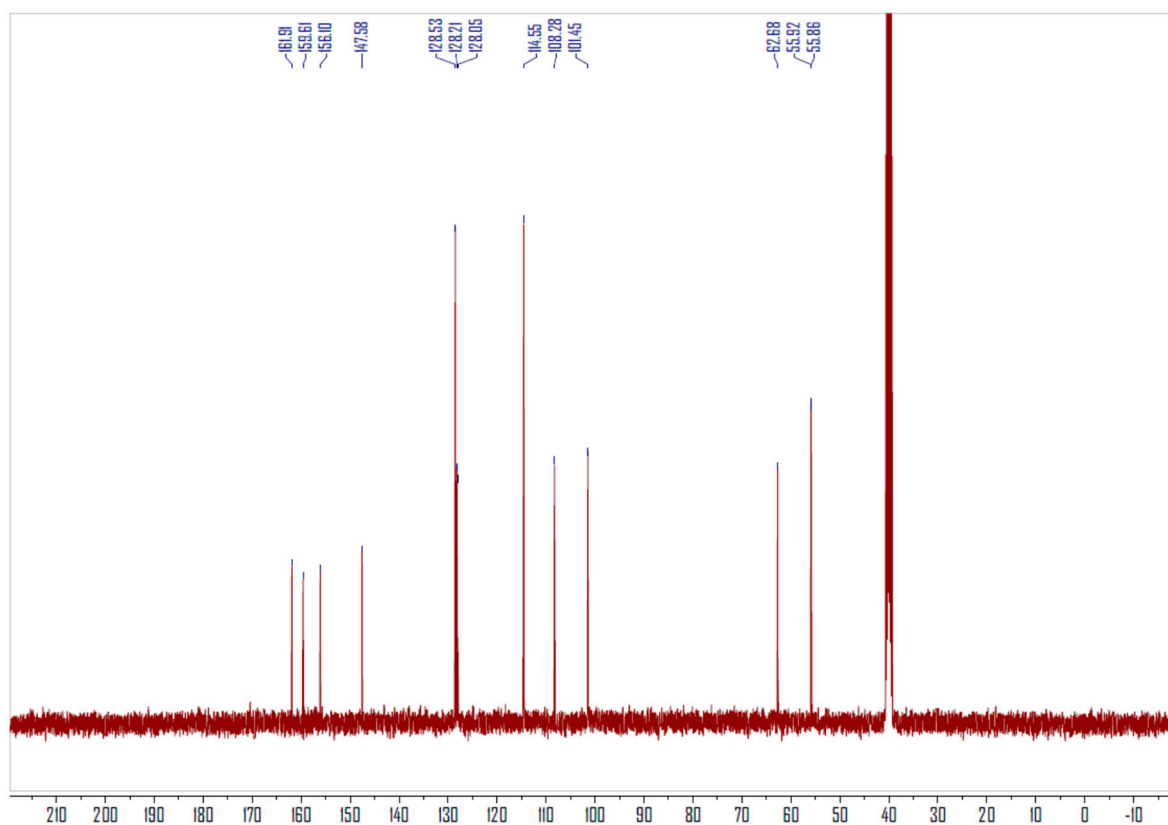

3-(4-fluorophenyl)-7-methoxy-2H-benzo[b][1,4]oxazine (**10b**)

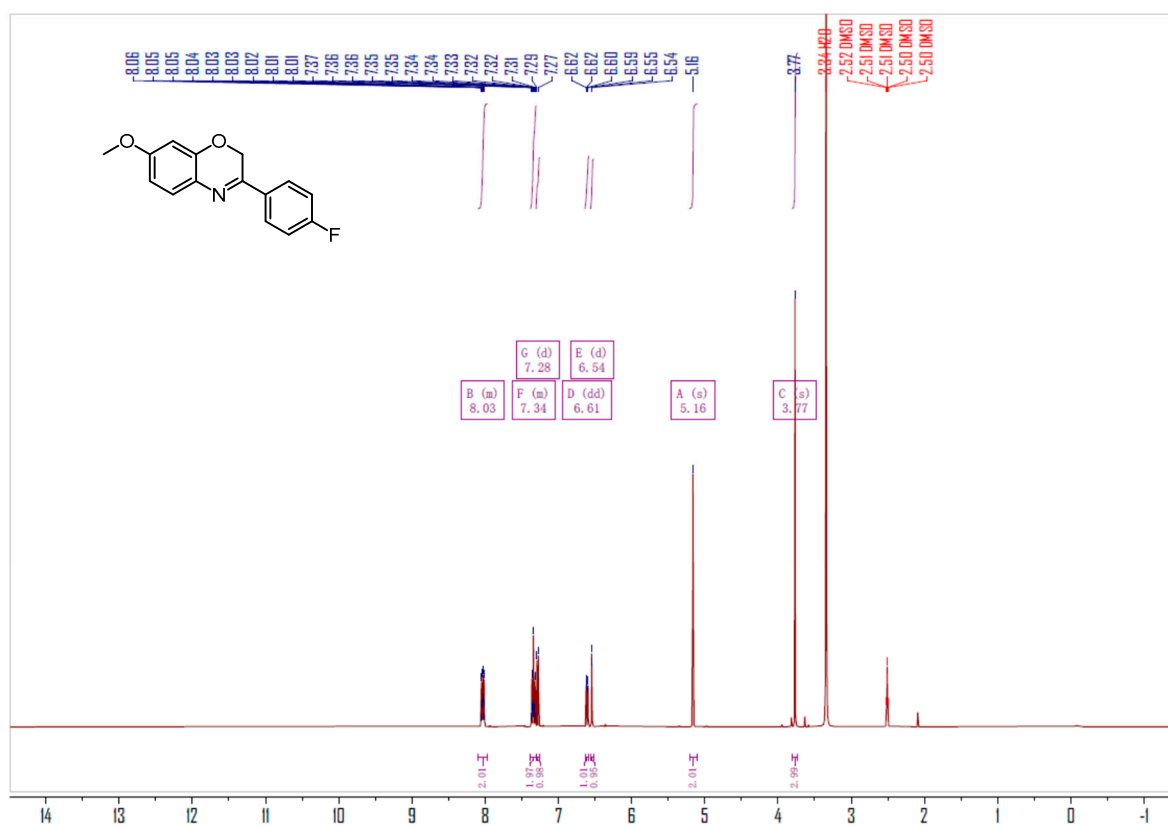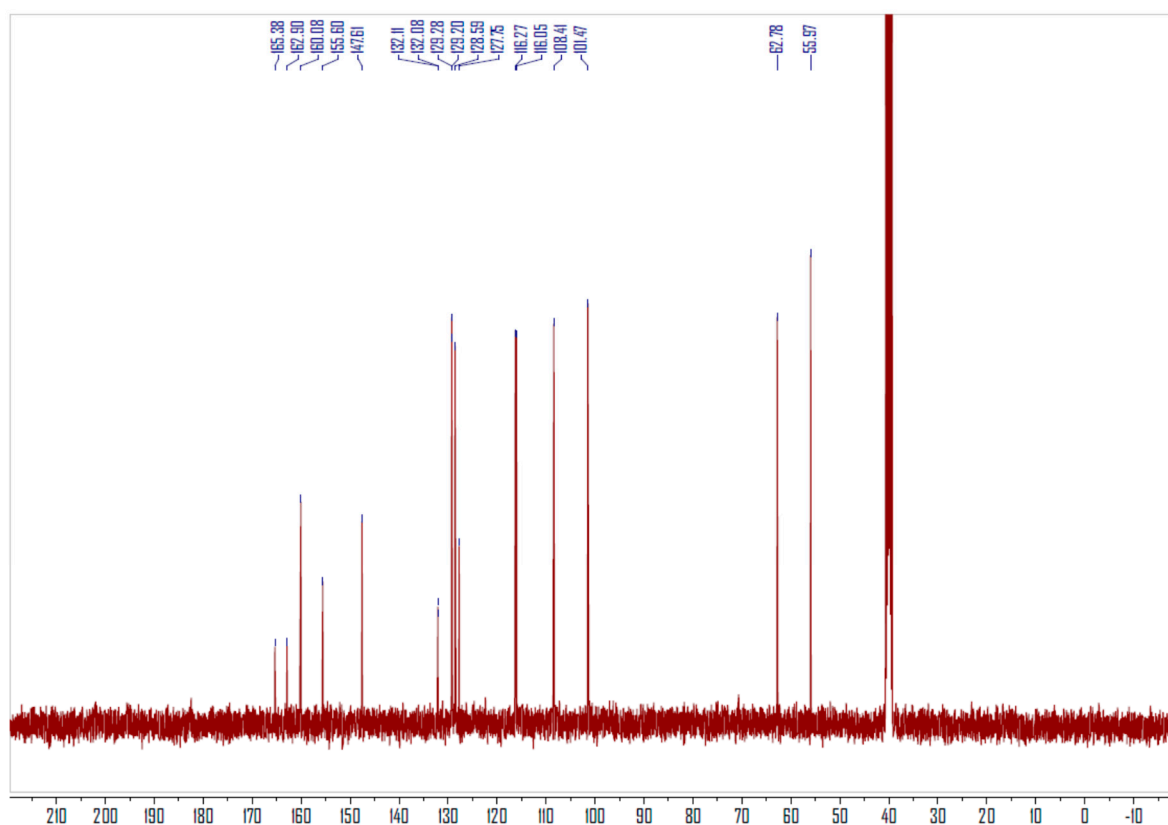



3,4-diphenyl-3,4-dihydro-2H-benzo[b][1,4]oxazine (**5a**)

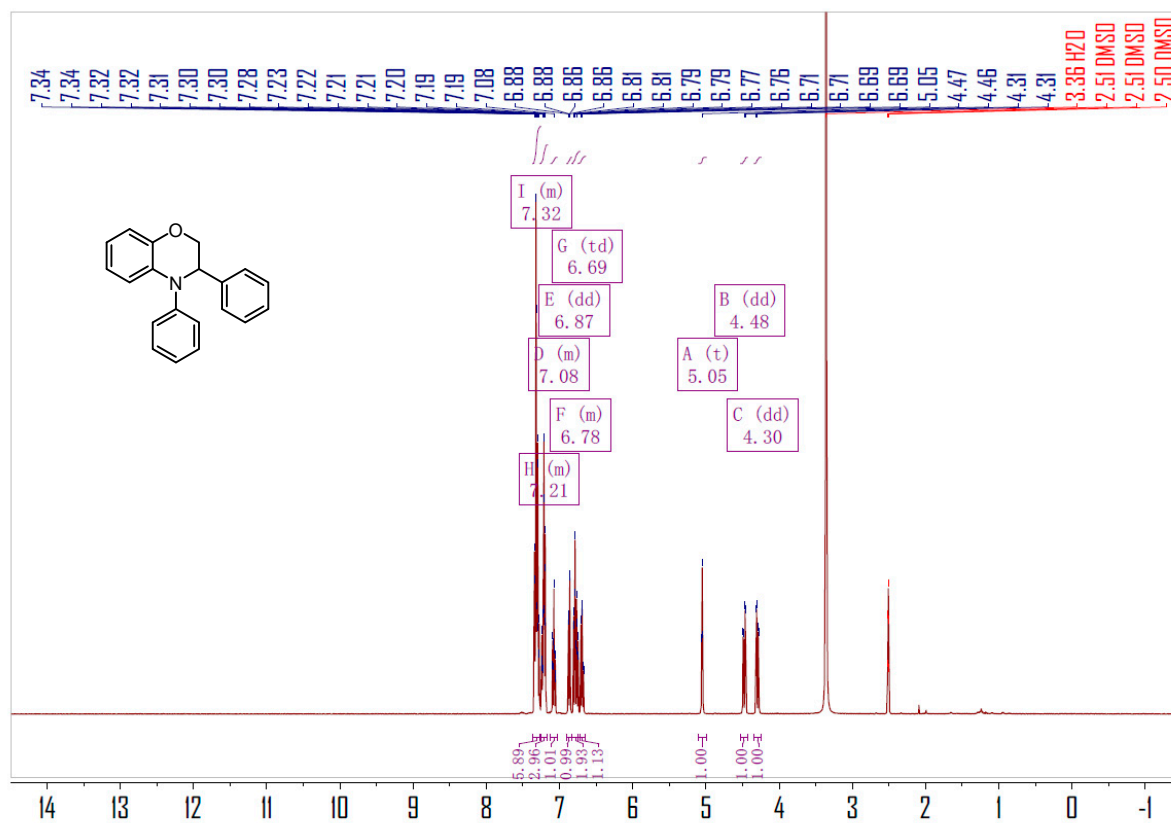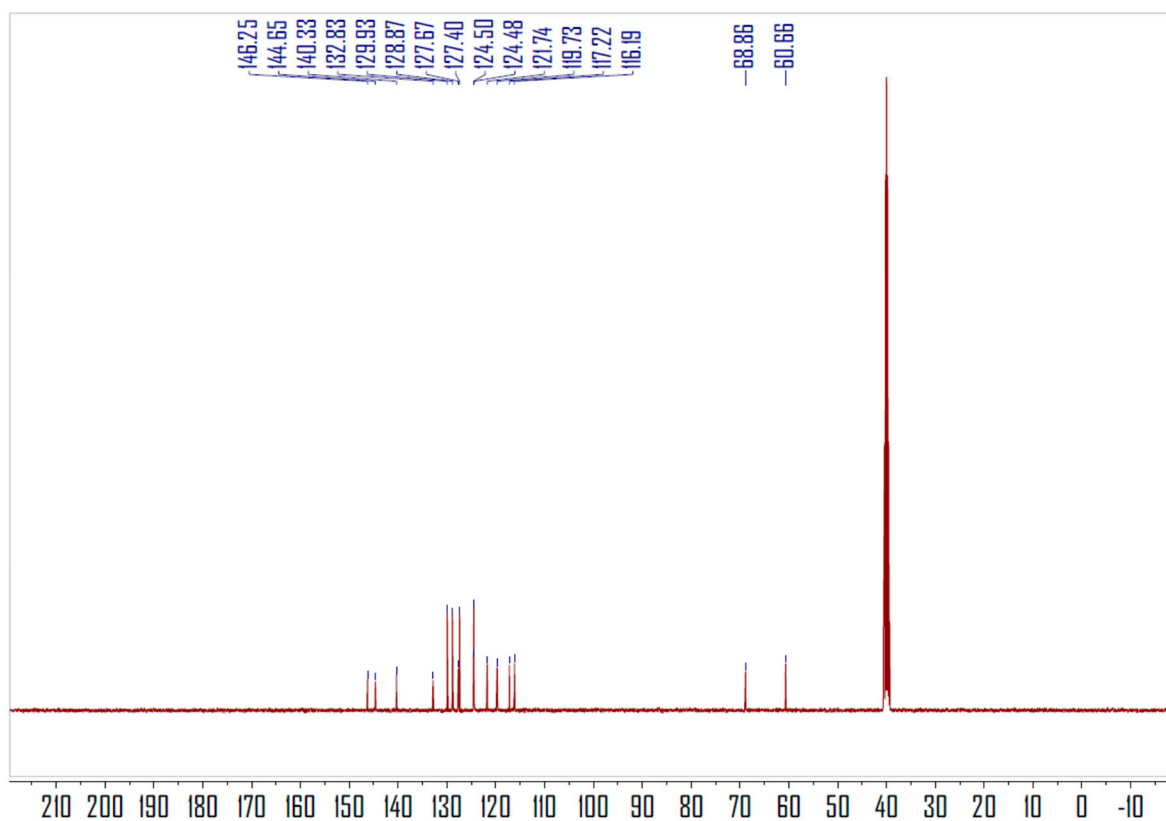

4-(4-nitrophenyl)-3-phenyl-3,4-dihydro-2H-benzo[b][1,4]oxazine (**5b**)

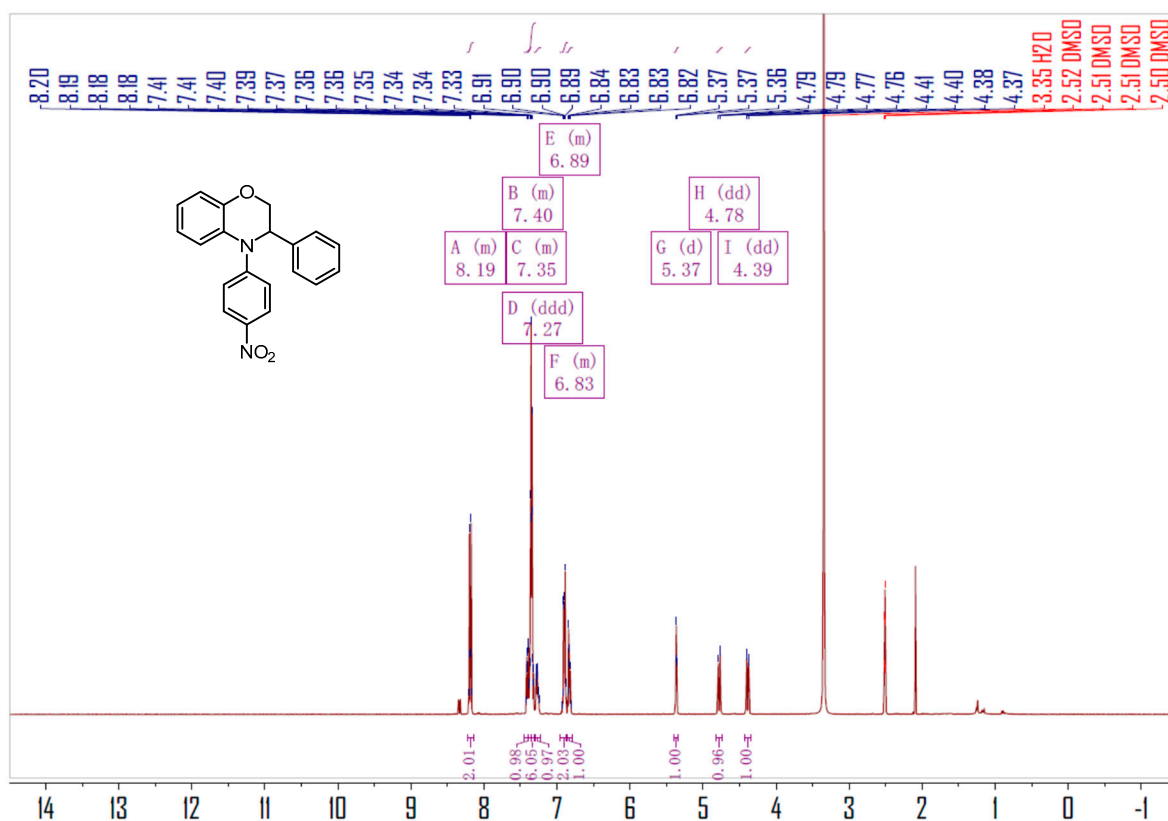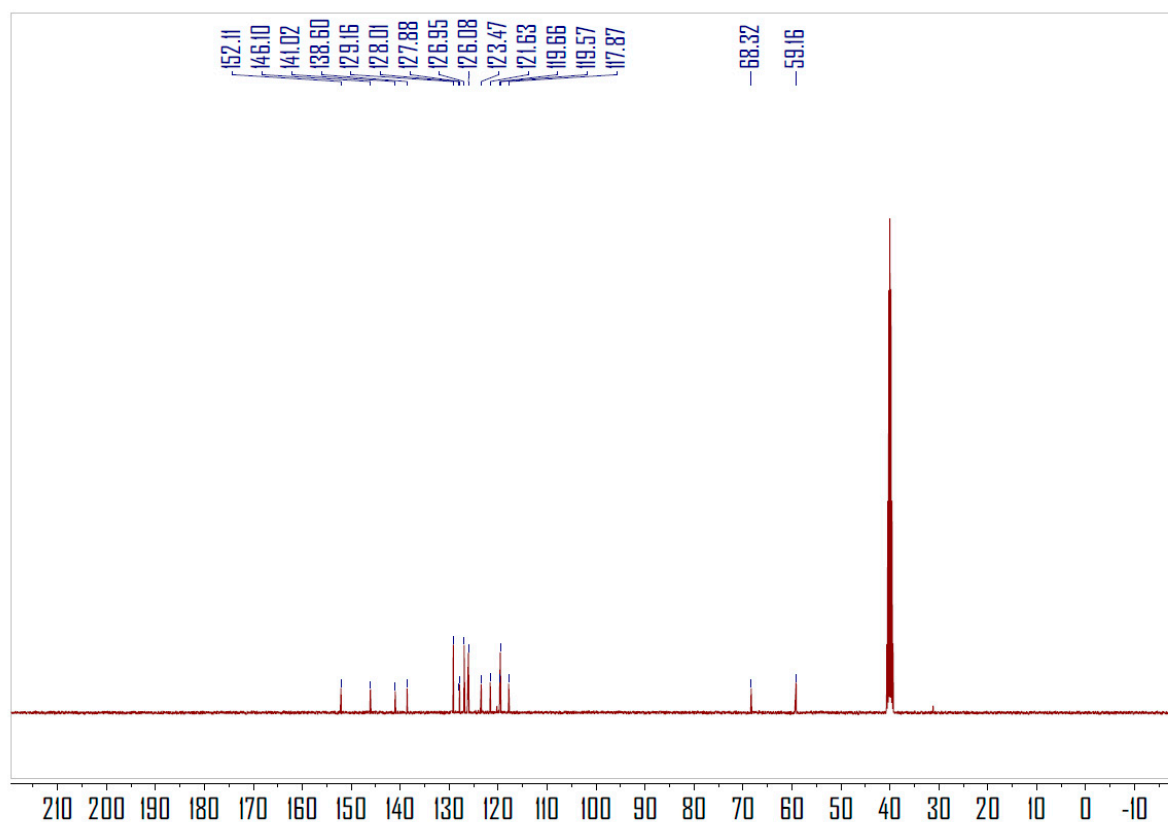

3-(4-methoxyphenyl)-4-phenyl-3,4-dihydro-2H-benzo[b][1,4]oxazine (**5c**)

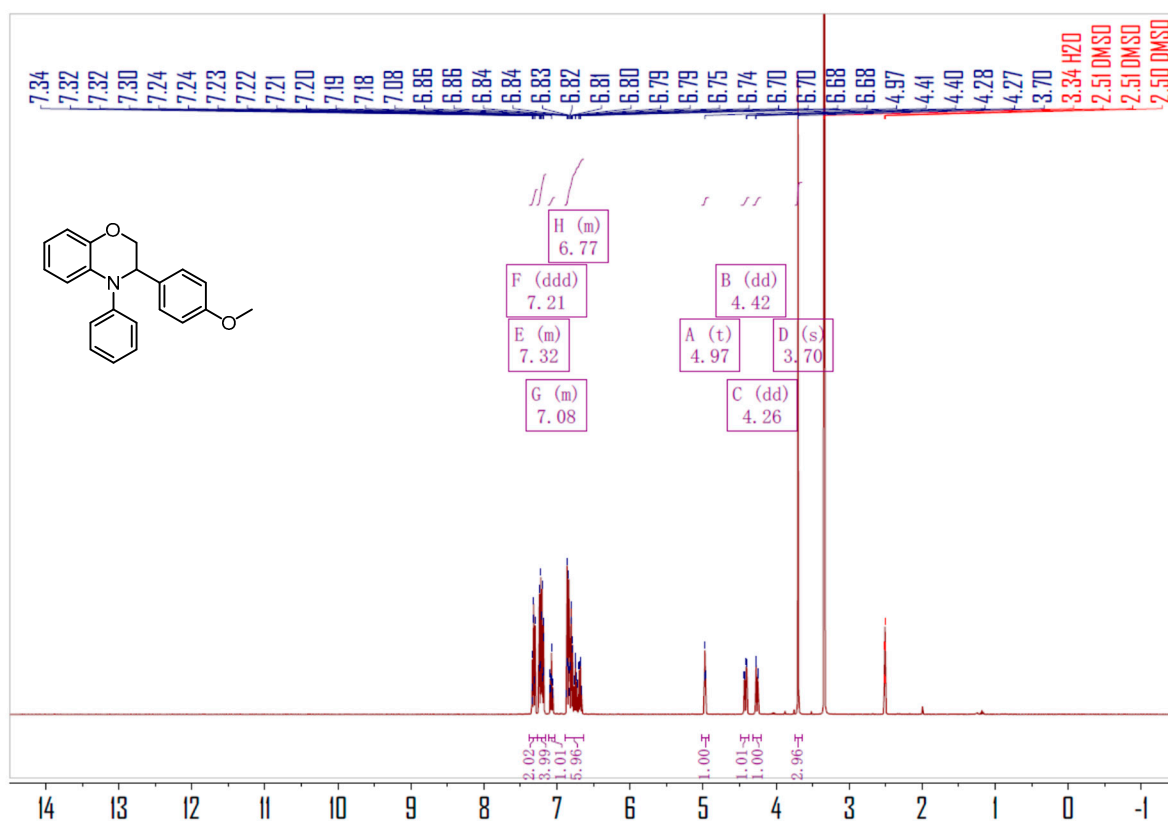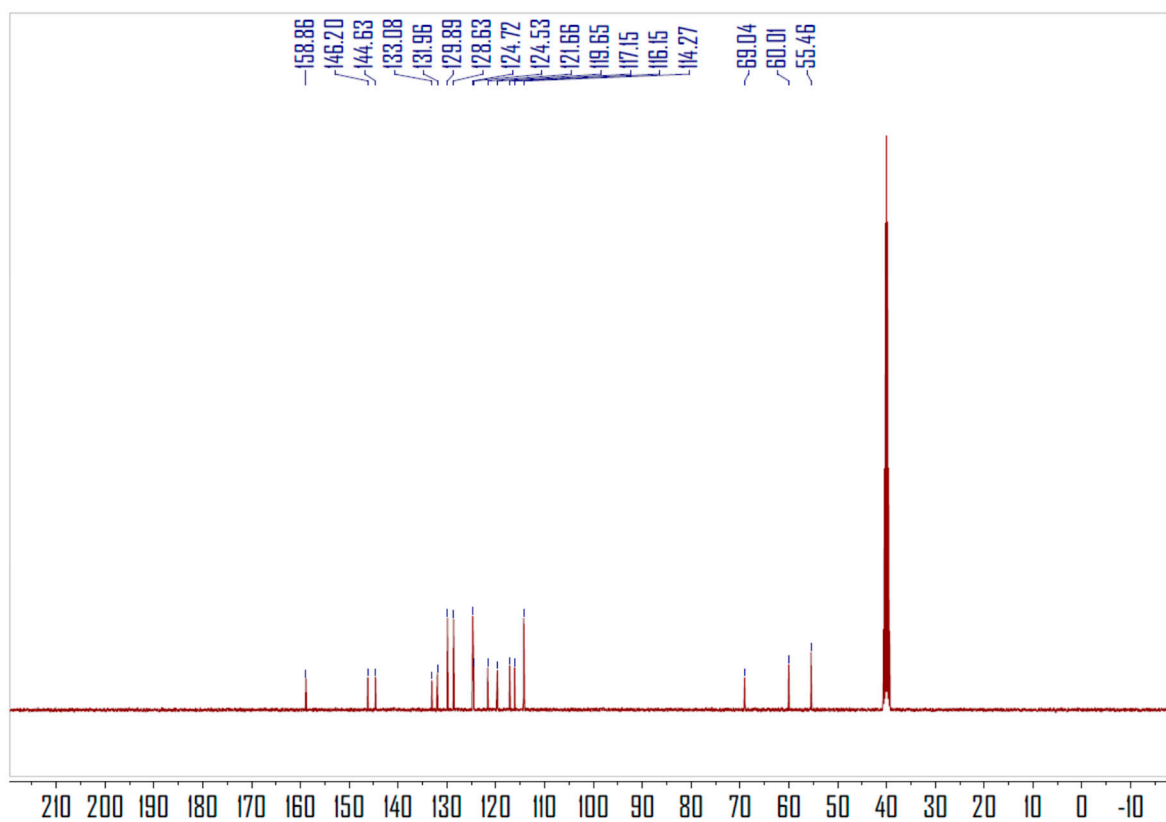

3-(4-methoxyphenyl)-4-(4-nitrophenyl)-3,4-dihydro-2H-benzo[b][1,4]oxazine (**5d**)

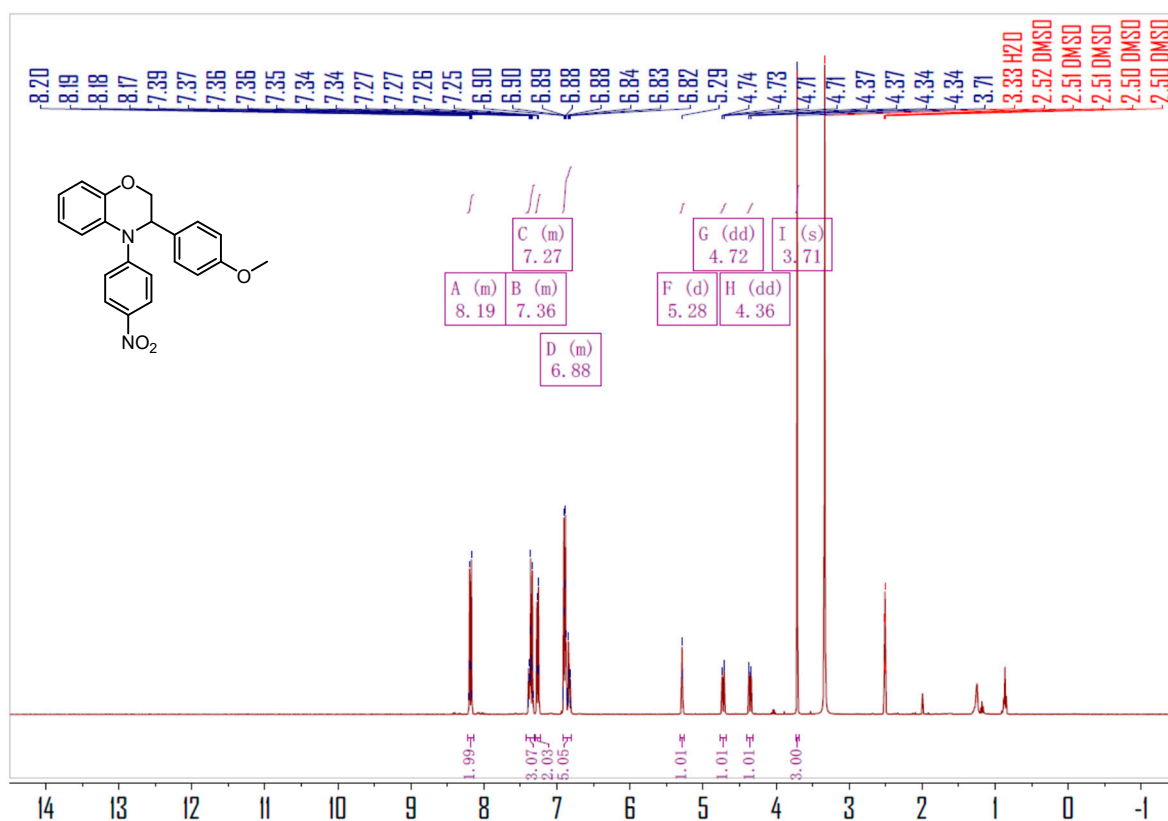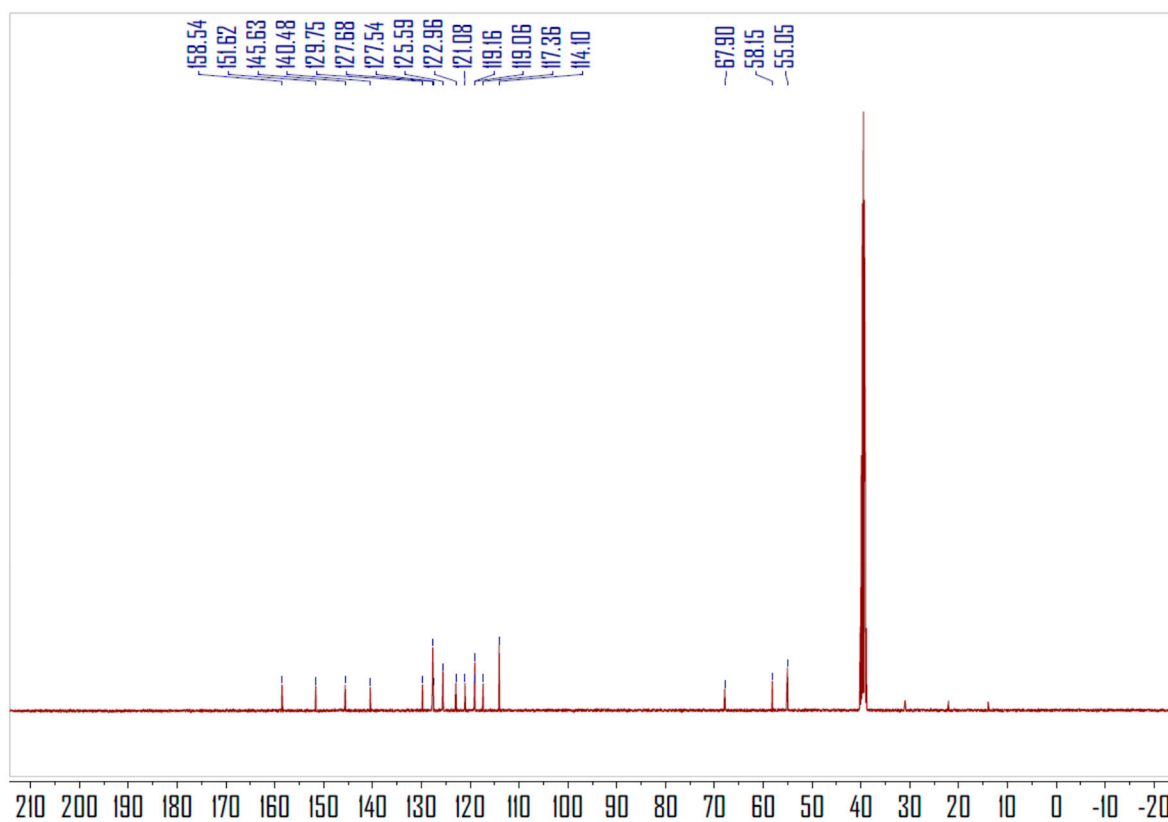

4-(4-fluorophenyl)-3-(4-methoxyphenyl)-3,4-dihydro-2H-benzo[b][1,4]oxazine (**5e**)

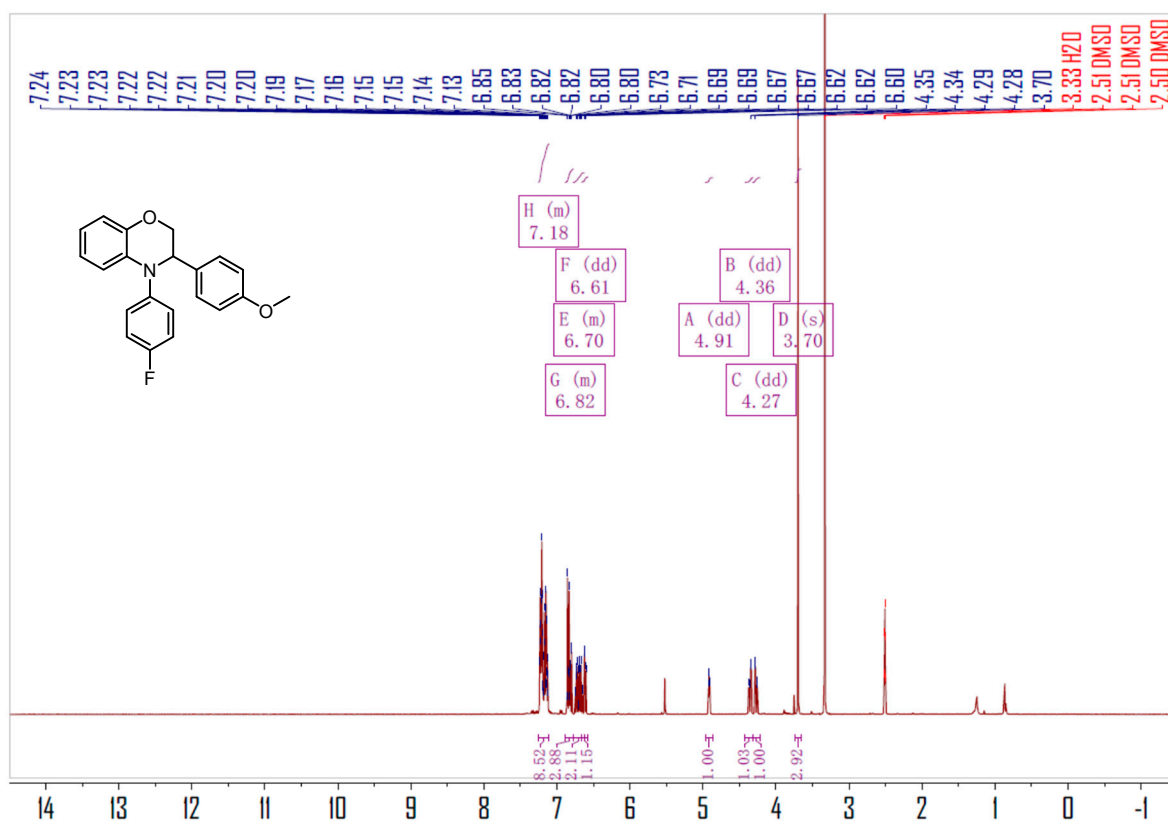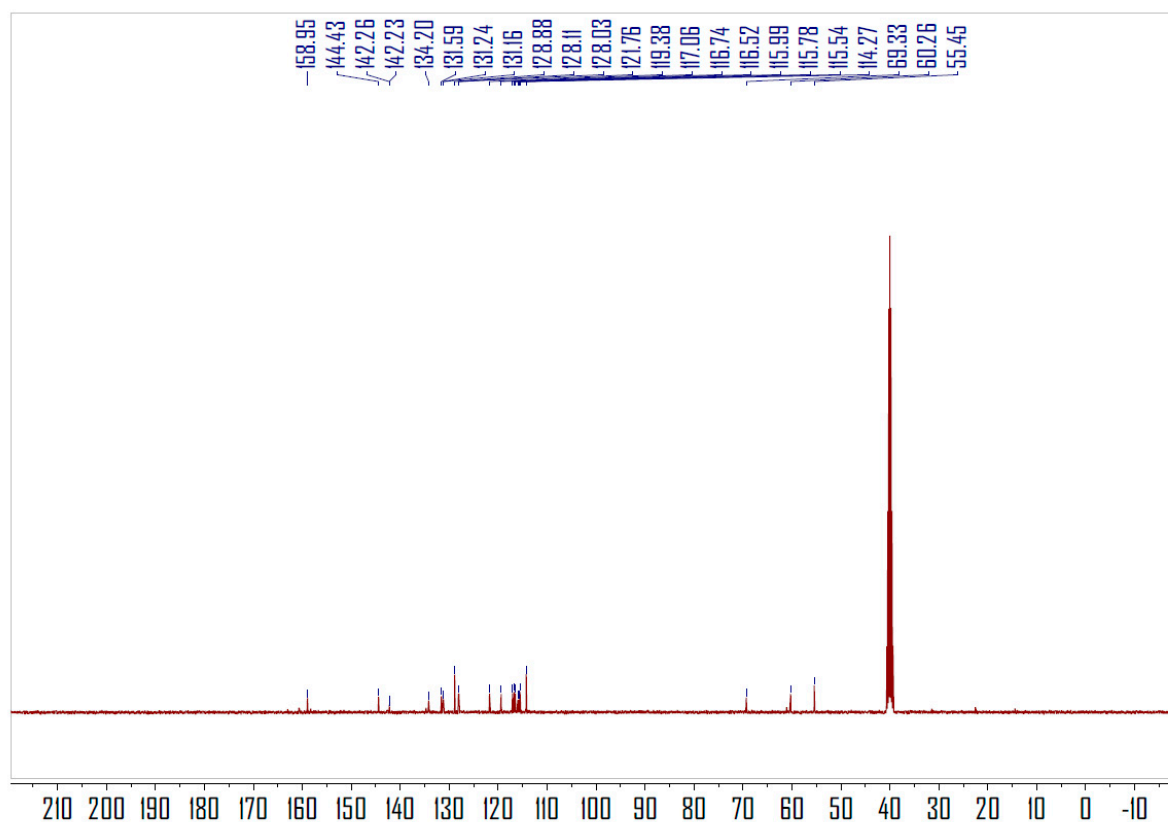

7-methoxy-3-(4-methoxyphenyl)-4-phenyl-3,4-dihydro-2H-benzo[b][1,4]oxazine (**11a**)

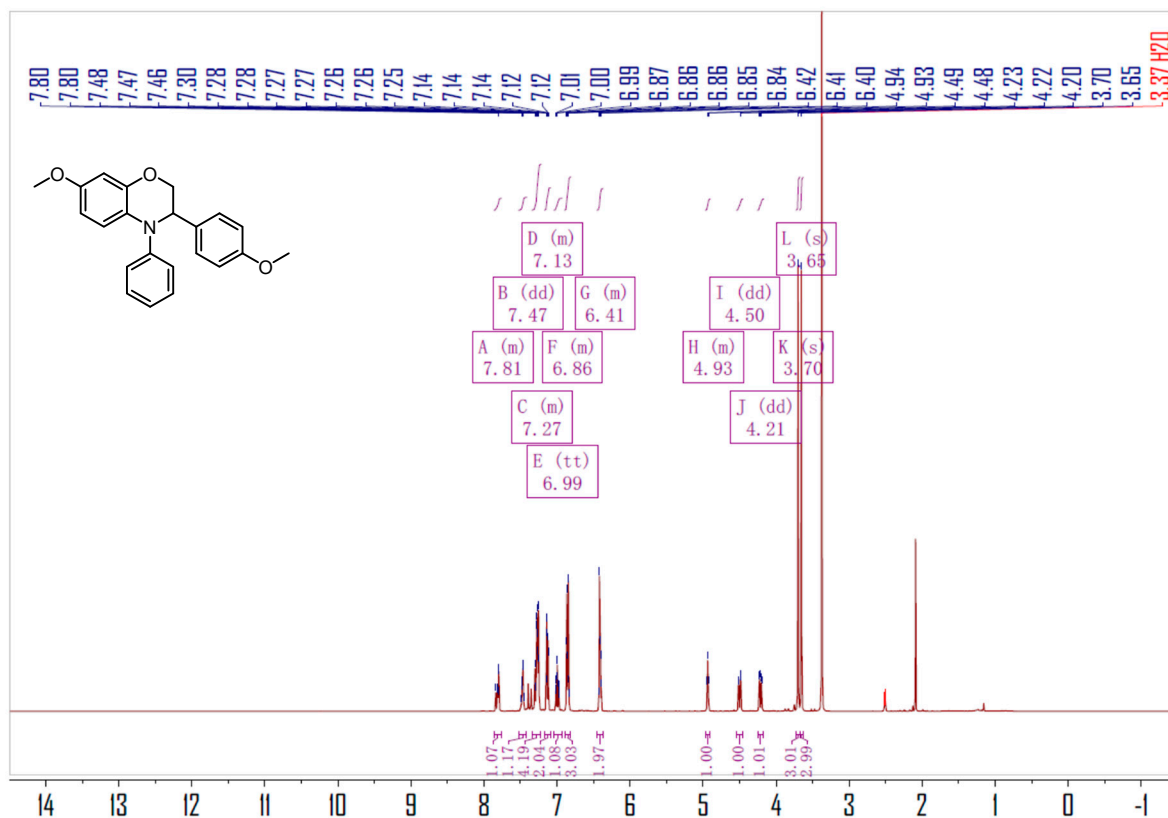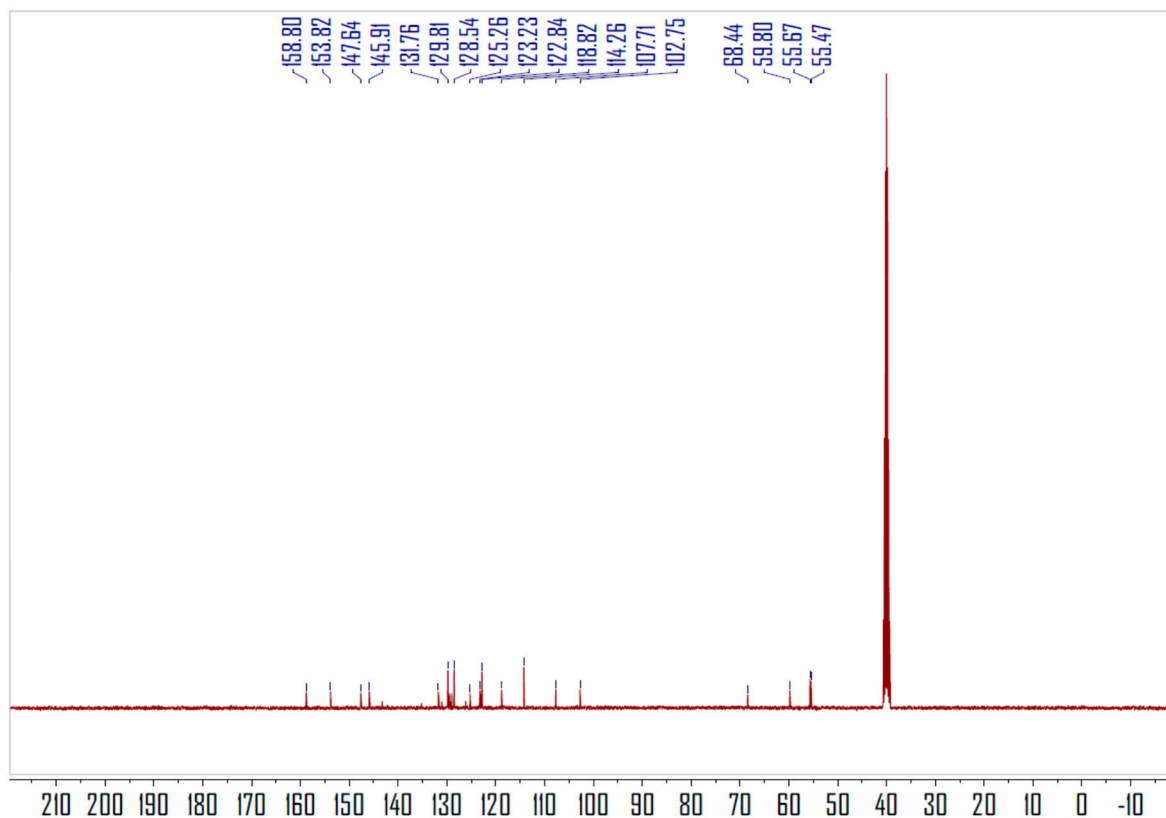

7-methoxy-3,4-bis(4-methoxyphenyl)-3,4-dihydro-2H-benzo[b][1,4]oxazine (**11b**).

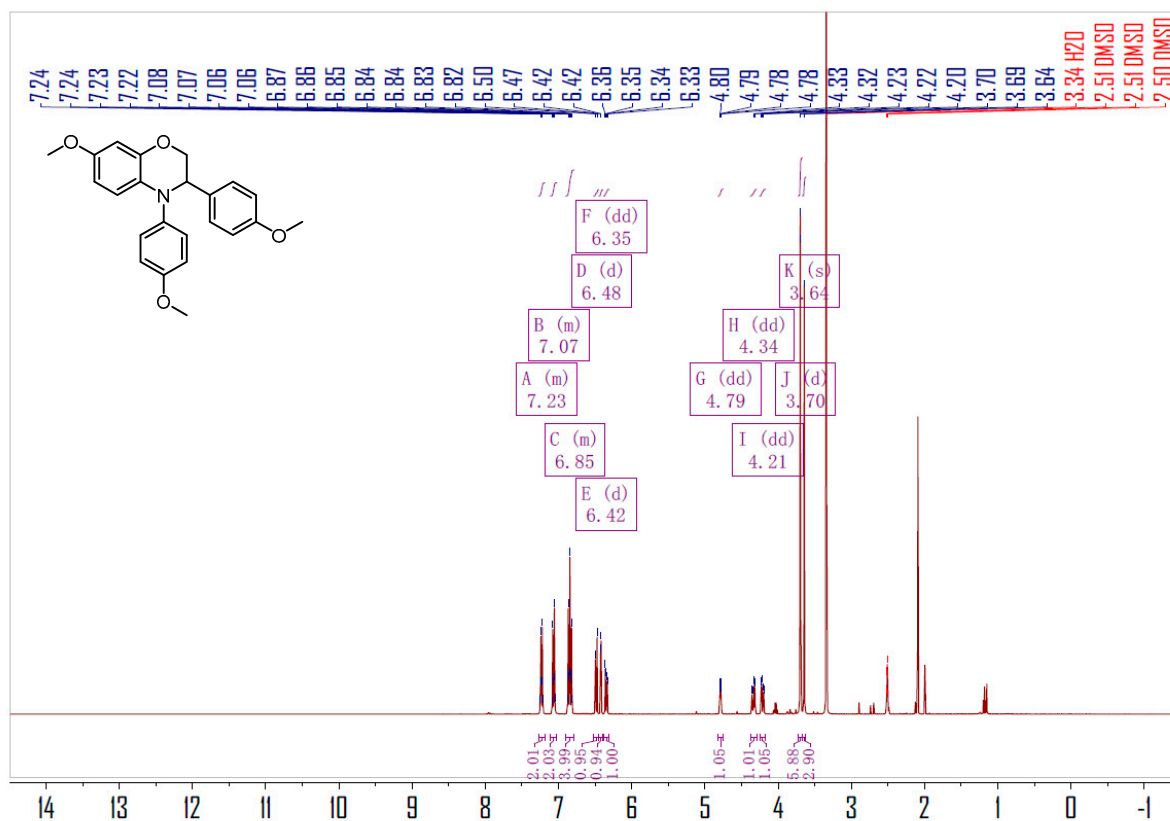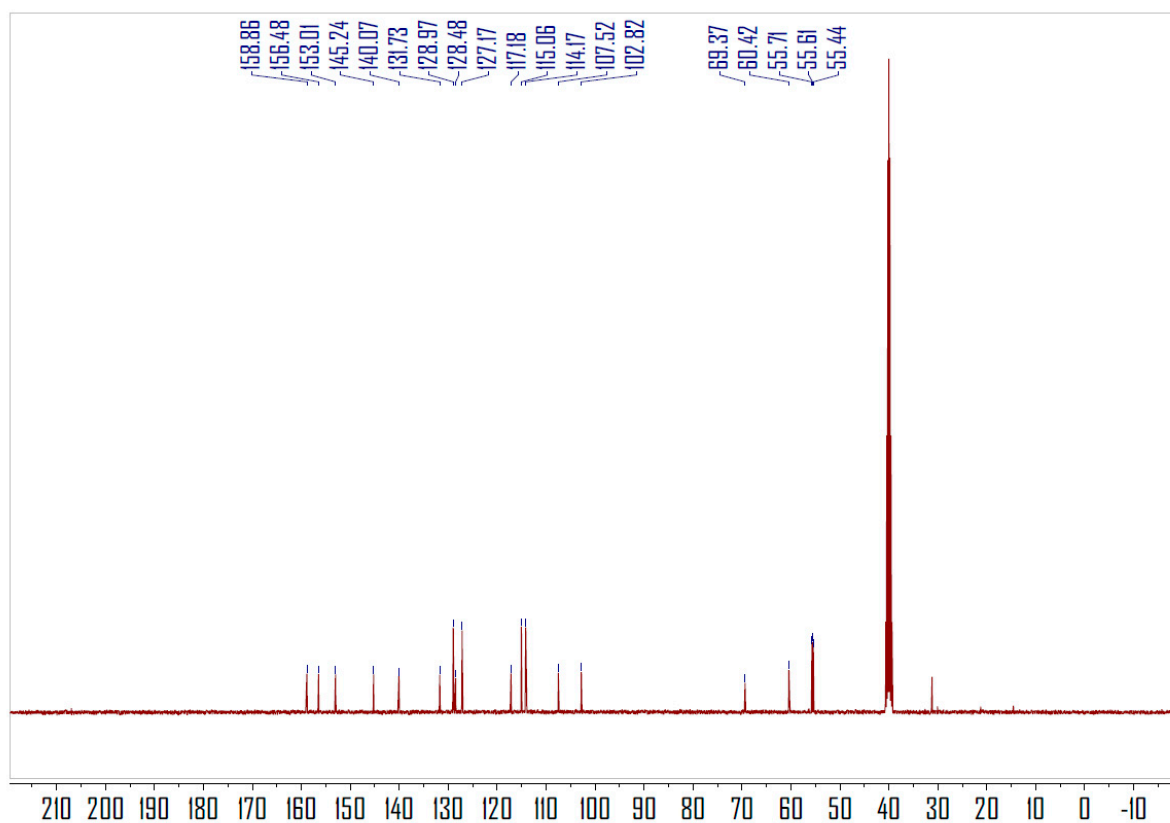

7-methoxy-3-(4-methoxyphenyl)-4-(4-nitrophenyl)-3,4-dihydro-2H-benzo[b][1,4]oxazine (**11c**)

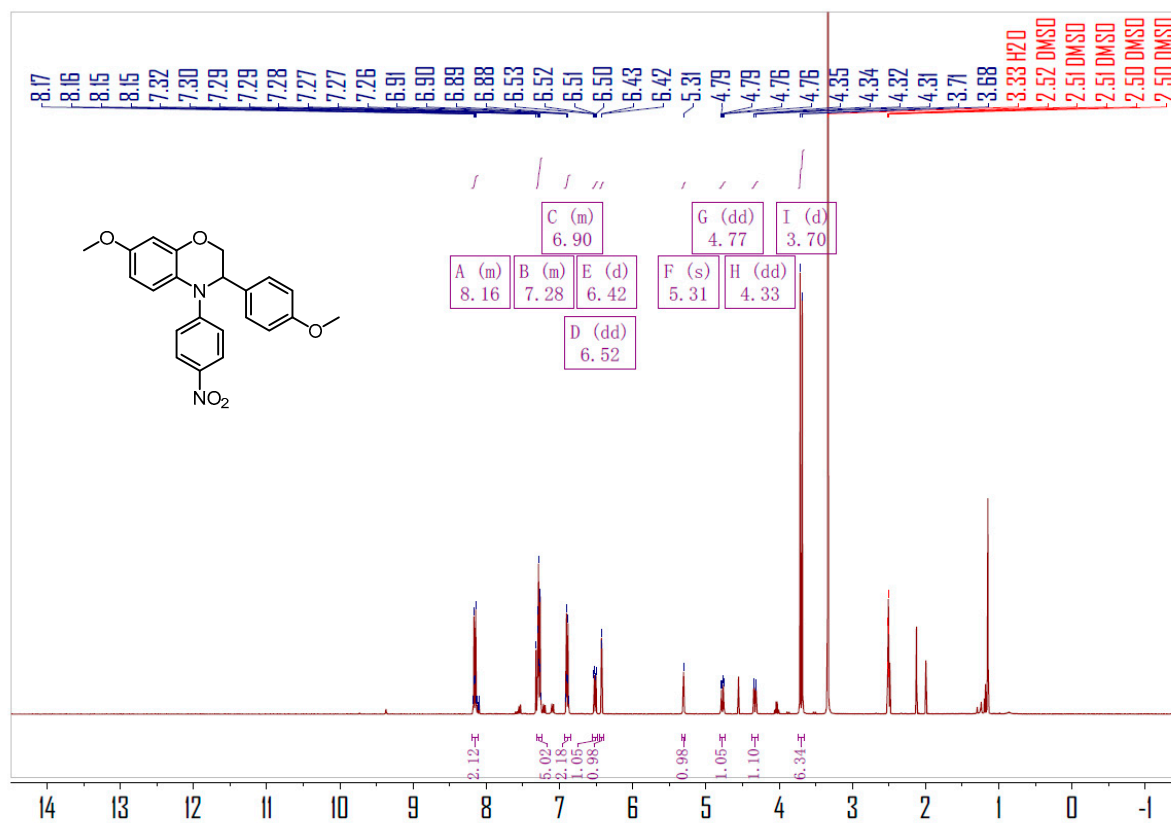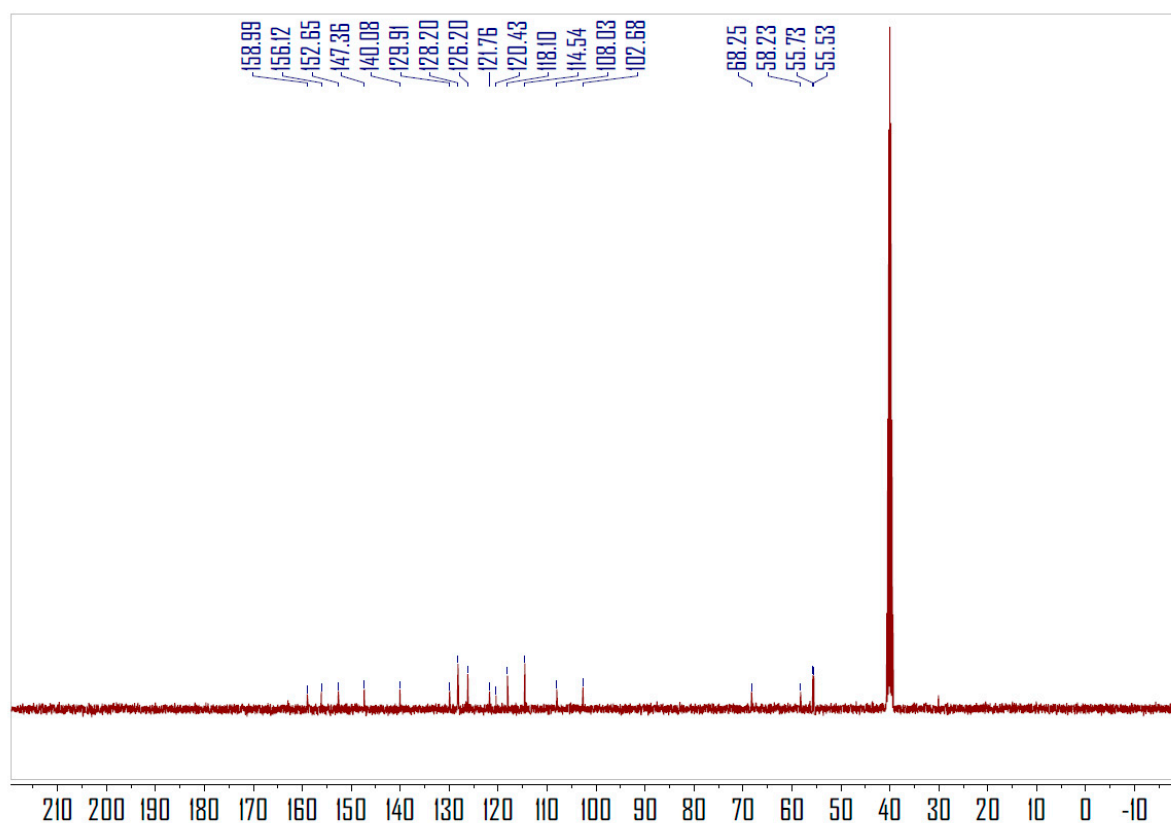



3-(2,4-dimethylphenyl)-7-methoxy-4-(4-methoxyphenyl)-3,4-dihydro-2H-benzo[b][1,4]oxazine  
(**11d**)

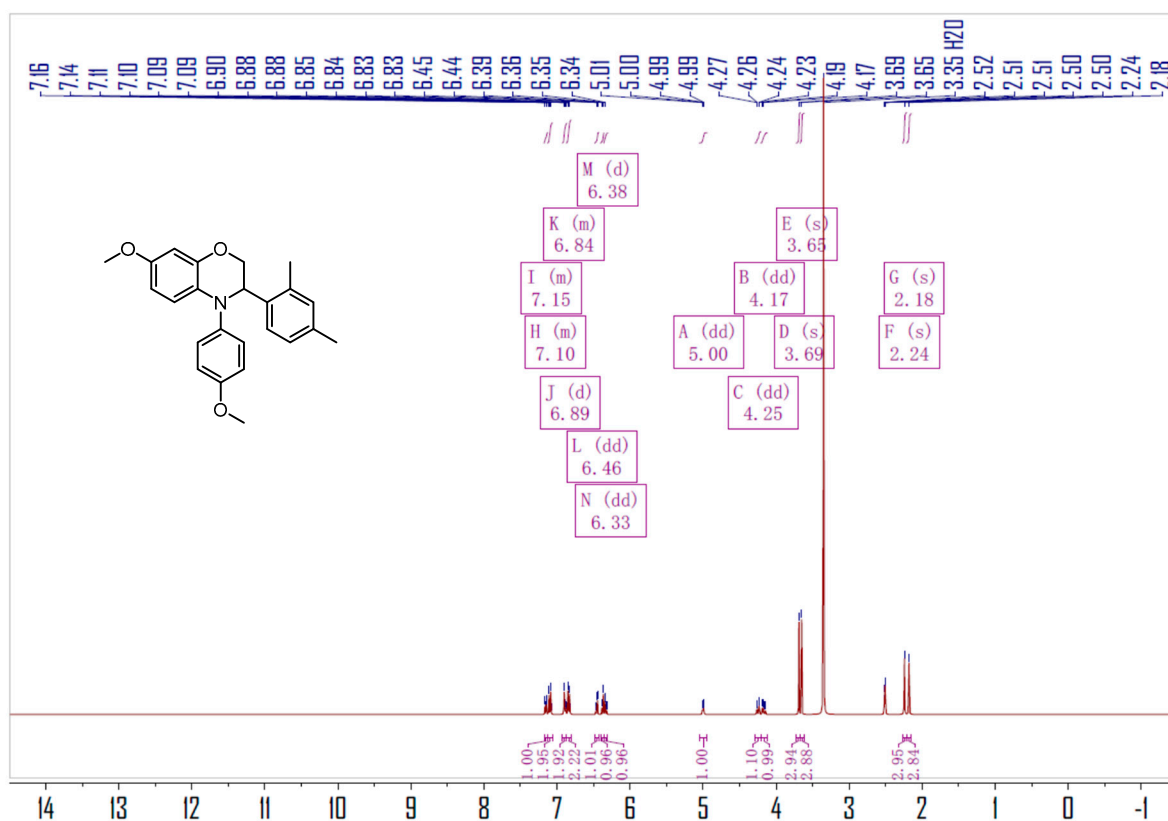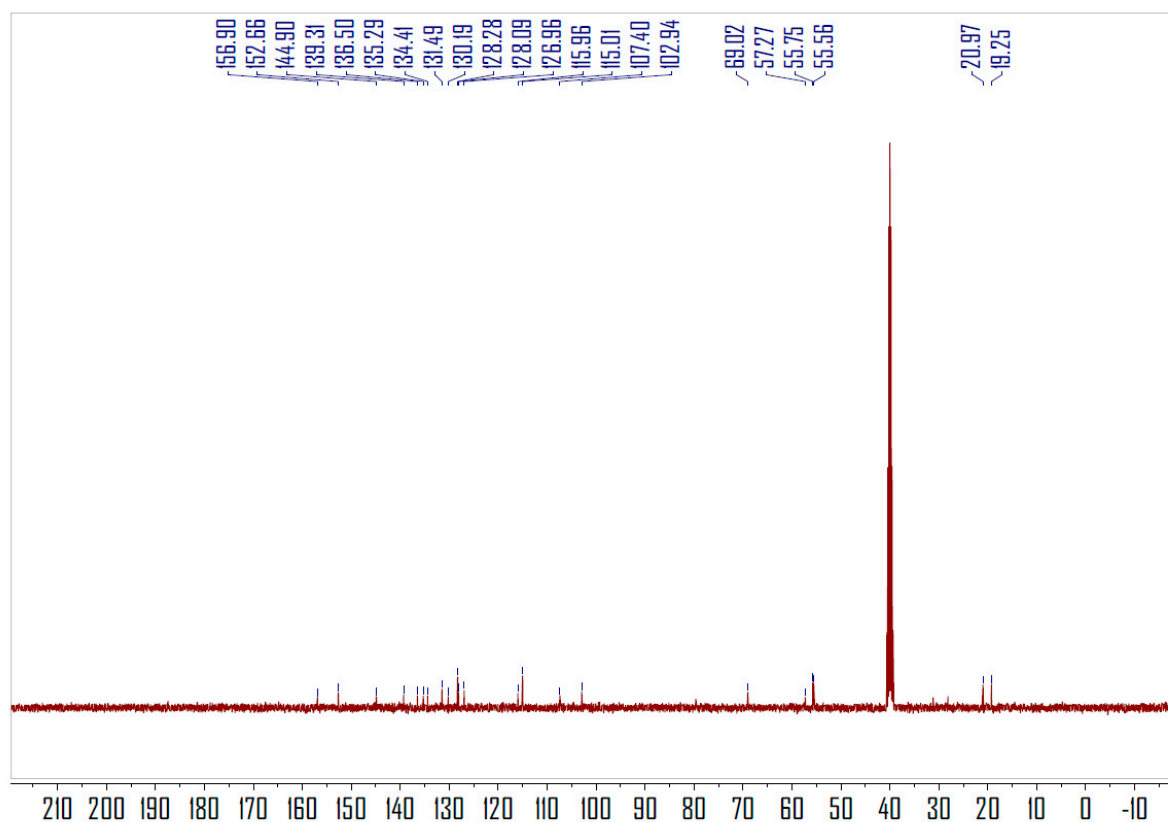

3-(2,4-dimethylphenyl)-7-methoxy-4-(4-nitrophenyl)-3,4-dihydro-2H-benzo[b][1,4]oxazine  
(11e)

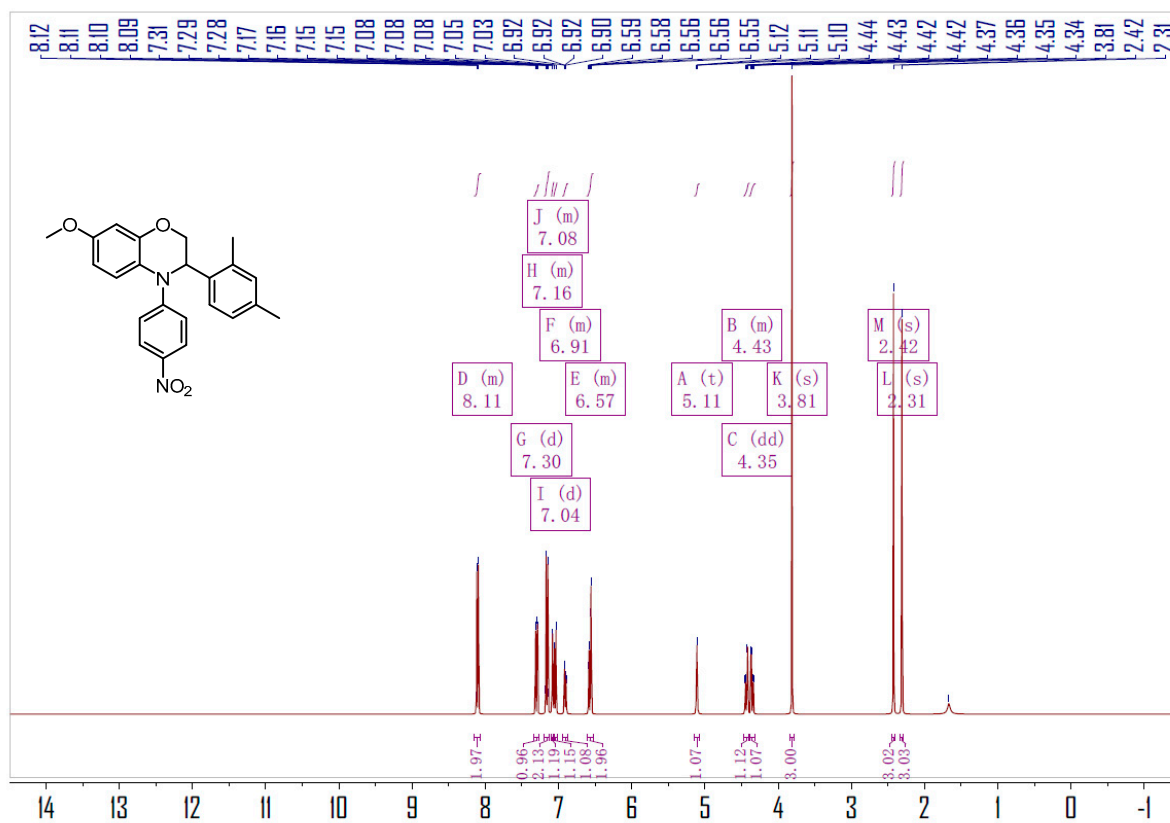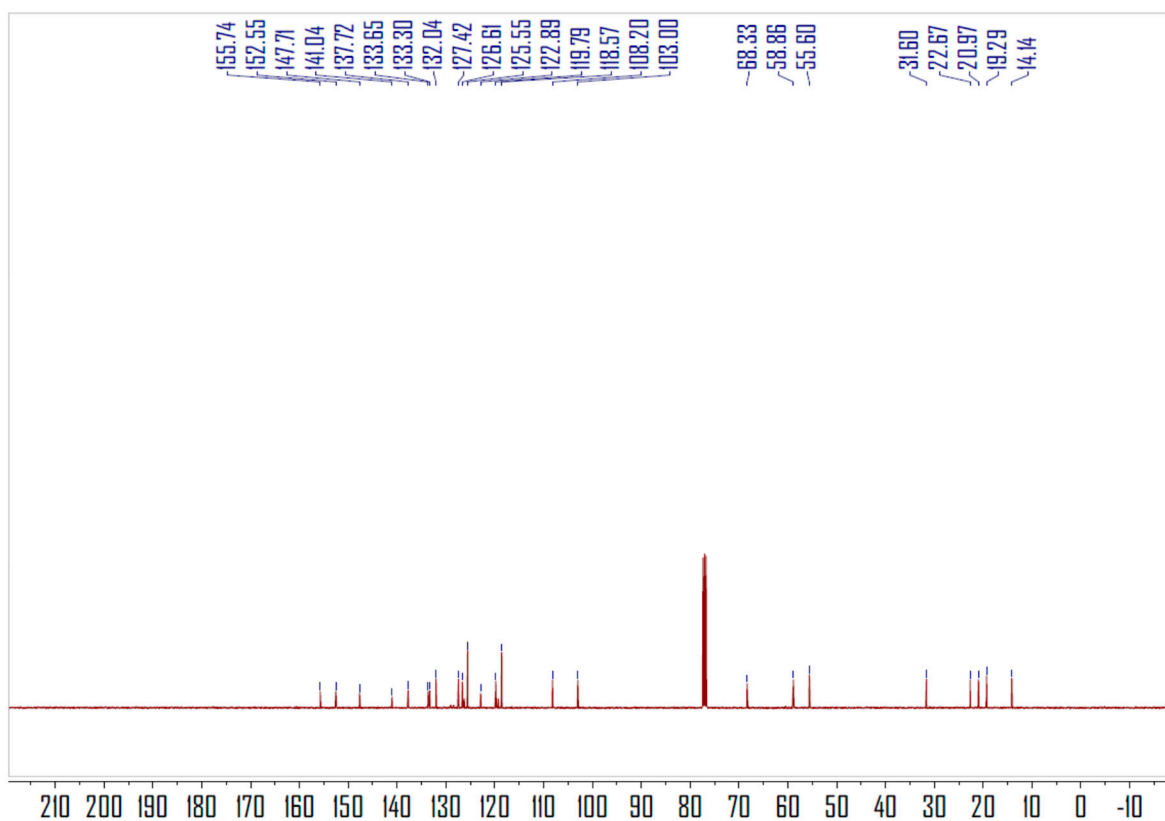

4-(2,4-dimethoxyphenyl)-7-methoxy-3-(4-methoxyphenyl)-4H-benzo[b][1,4]oxazine (**12**)

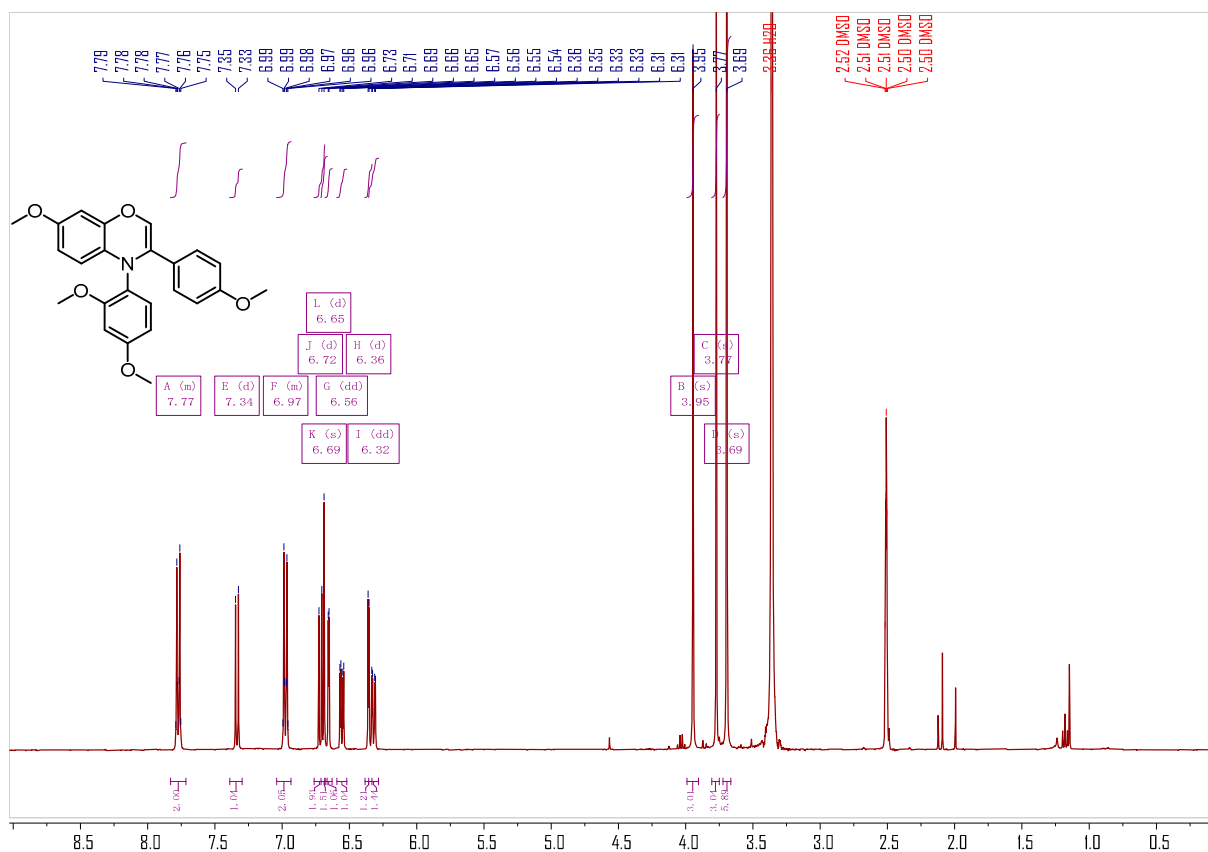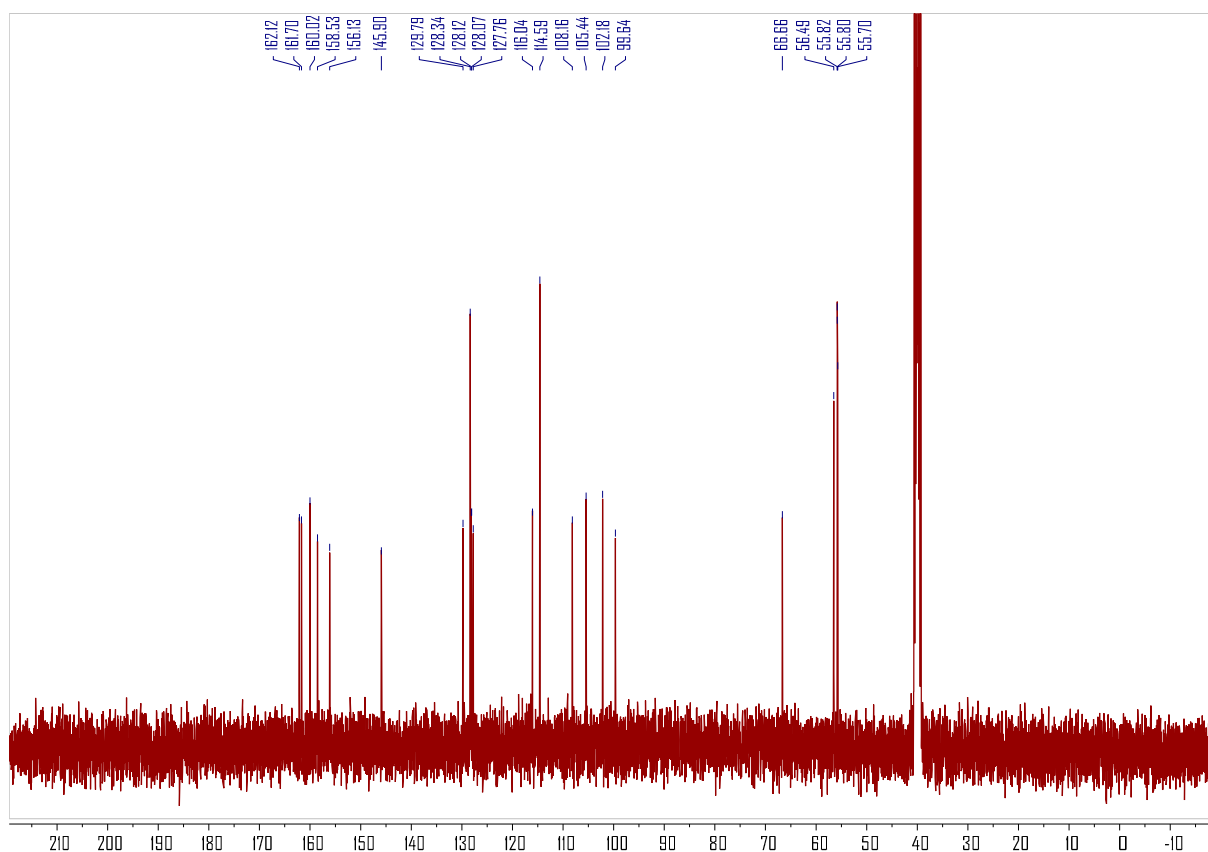

3-(2,4-dimethylphenyl)-7-methoxy-4-(quinolin-3-yl)-3,4-dihydro-2H-benzo[b][1,4]oxazine  
(15a)

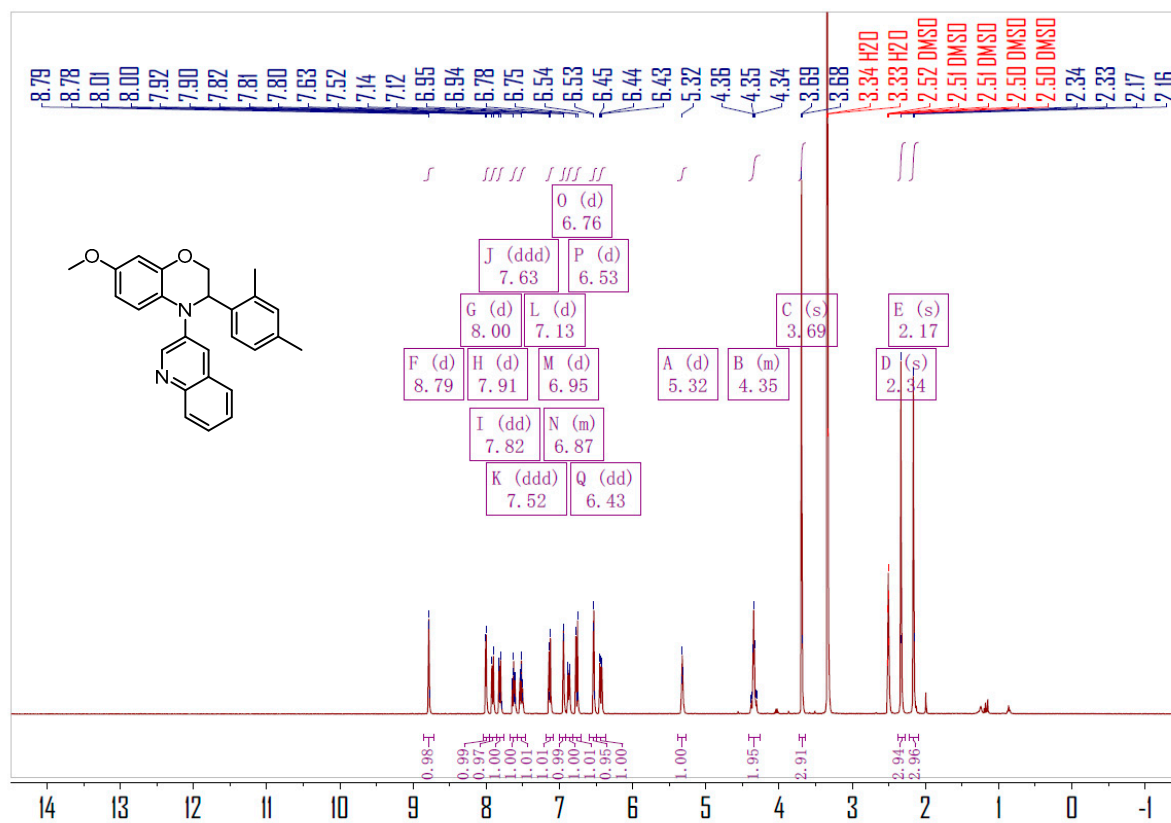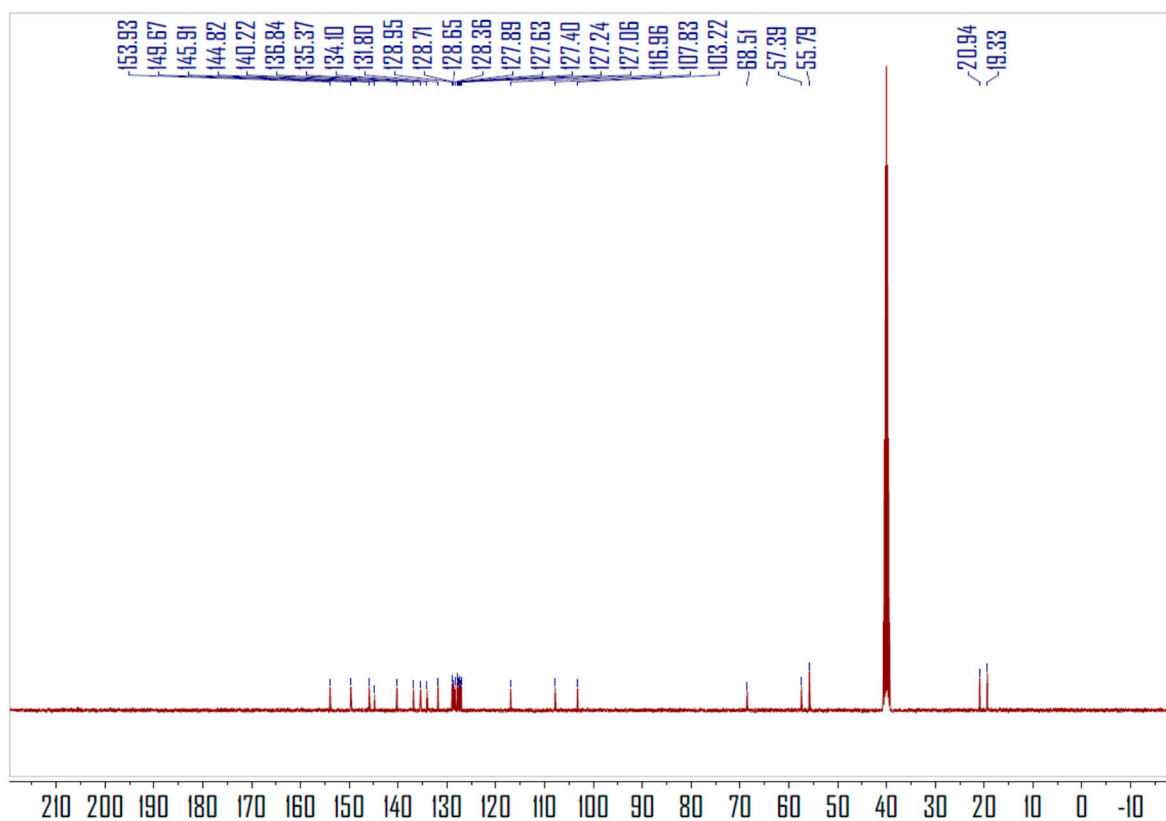

3-(4-fluorophenyl)-7-methoxy-4-(4-methoxyphenyl)-3,4-dihydro-2H-benzo[b][1,4]oxazine  
(11f)

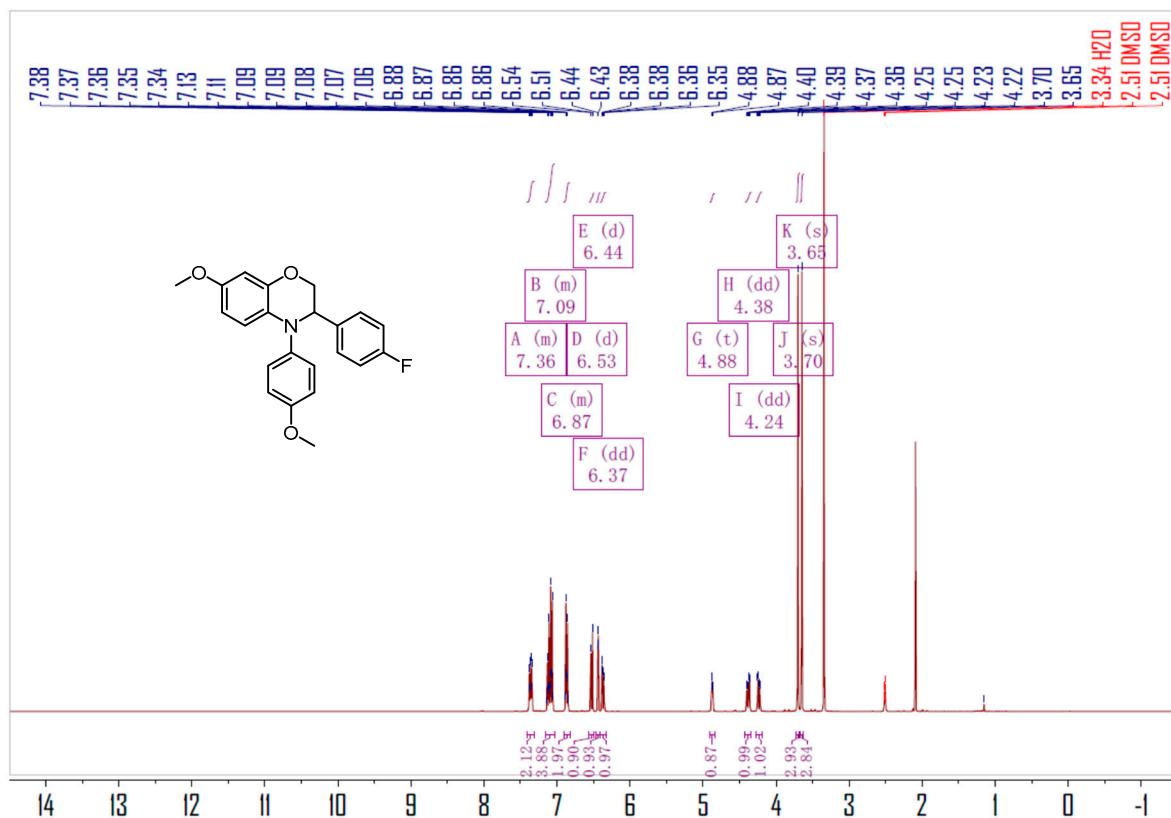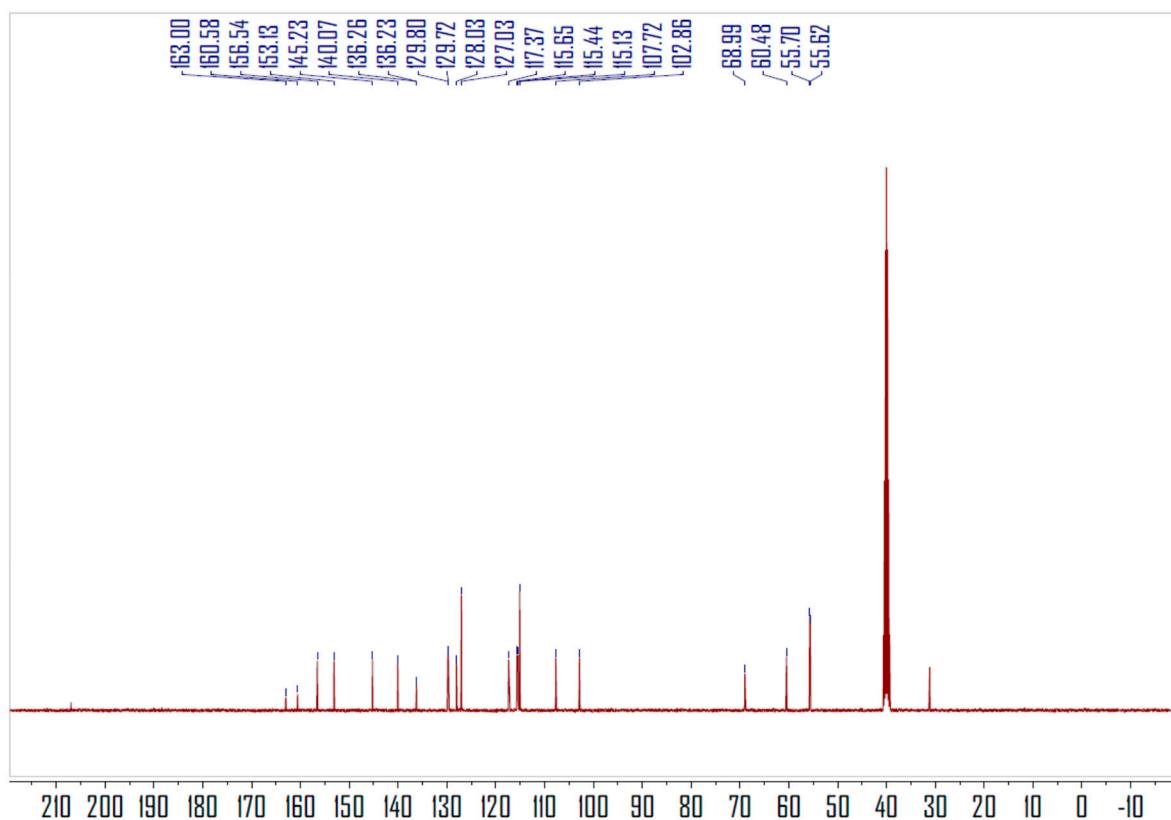

3-(4-fluorophenyl)-7-methoxy-4-(4-nitrophenyl)-3,4-dihydro-2H-benzo[b][1,4]oxazine (**11g**)

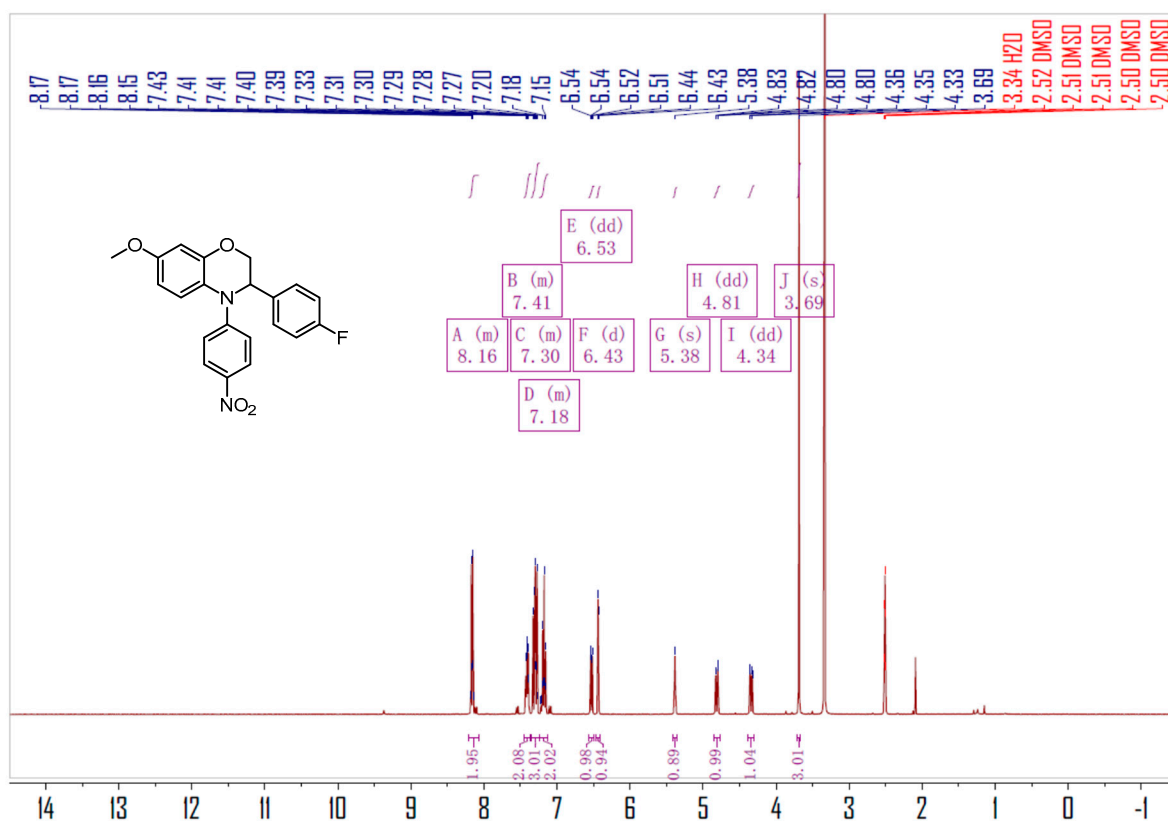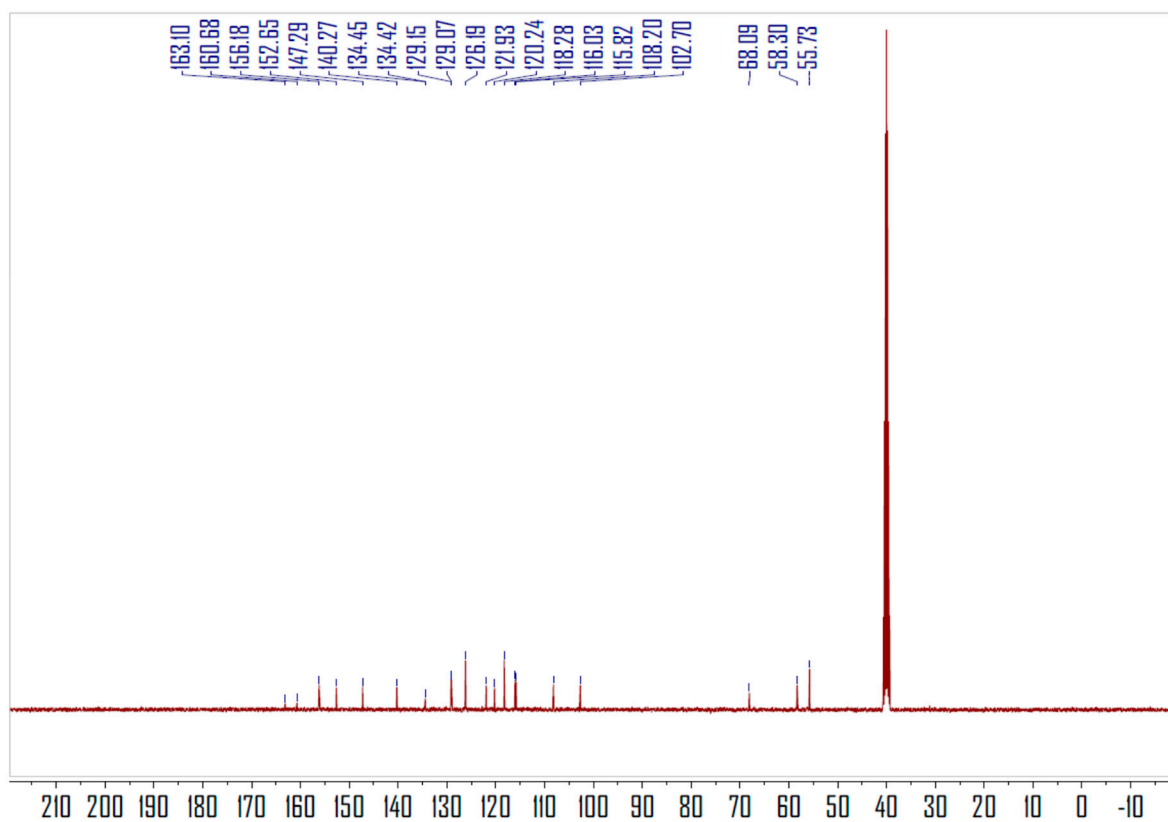

3-(4-fluorophenyl)-7-methoxy-4-(quinolin-3-yl)-3,4-dihydro-2H-benzo[b][1,4]oxazine (**15b**)

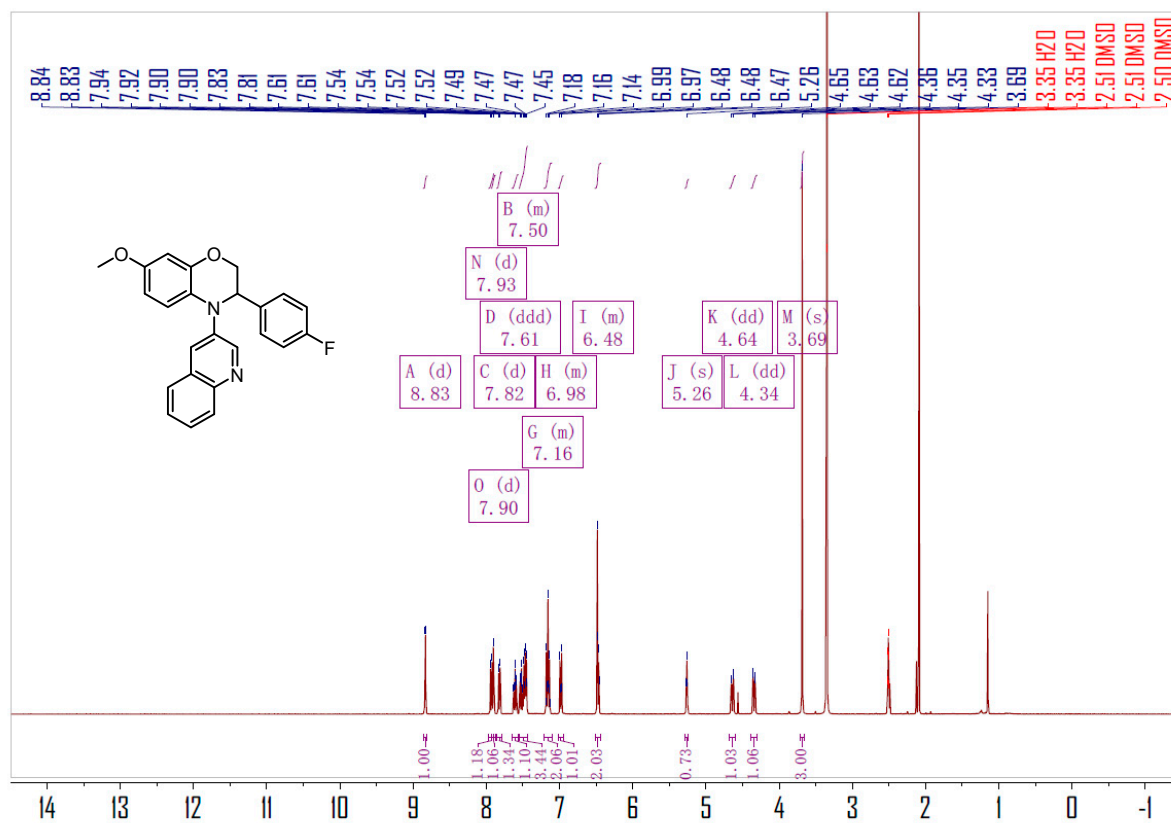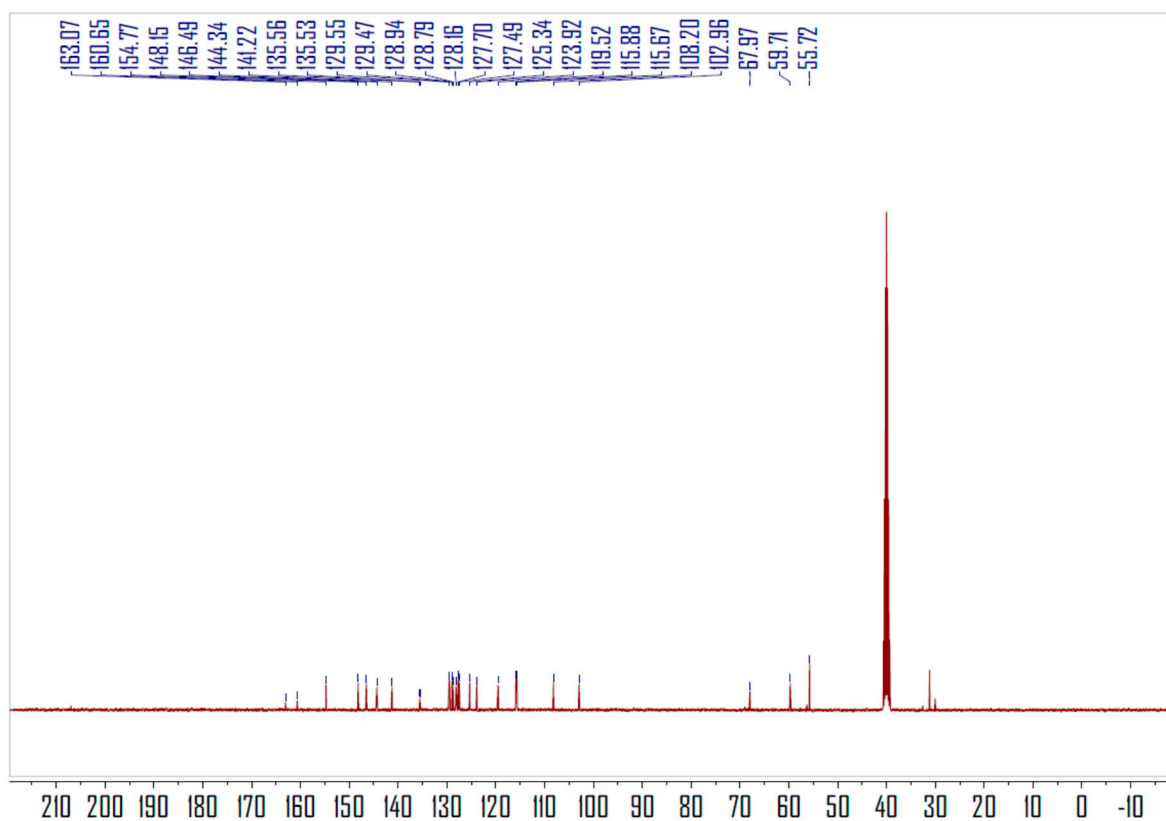

4-(3-phenyl-2,3-dihydro-4H-benzo[b][1,4]oxazin-4-yl)aniline (**13a**)

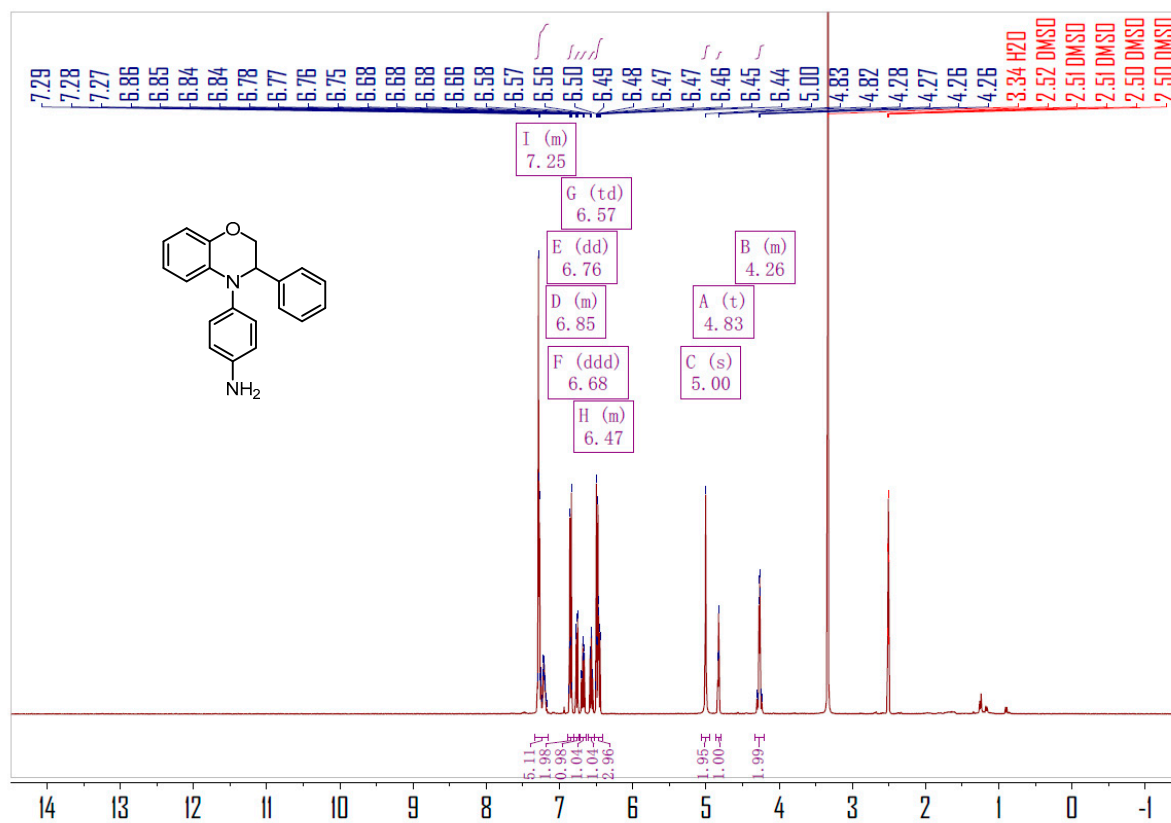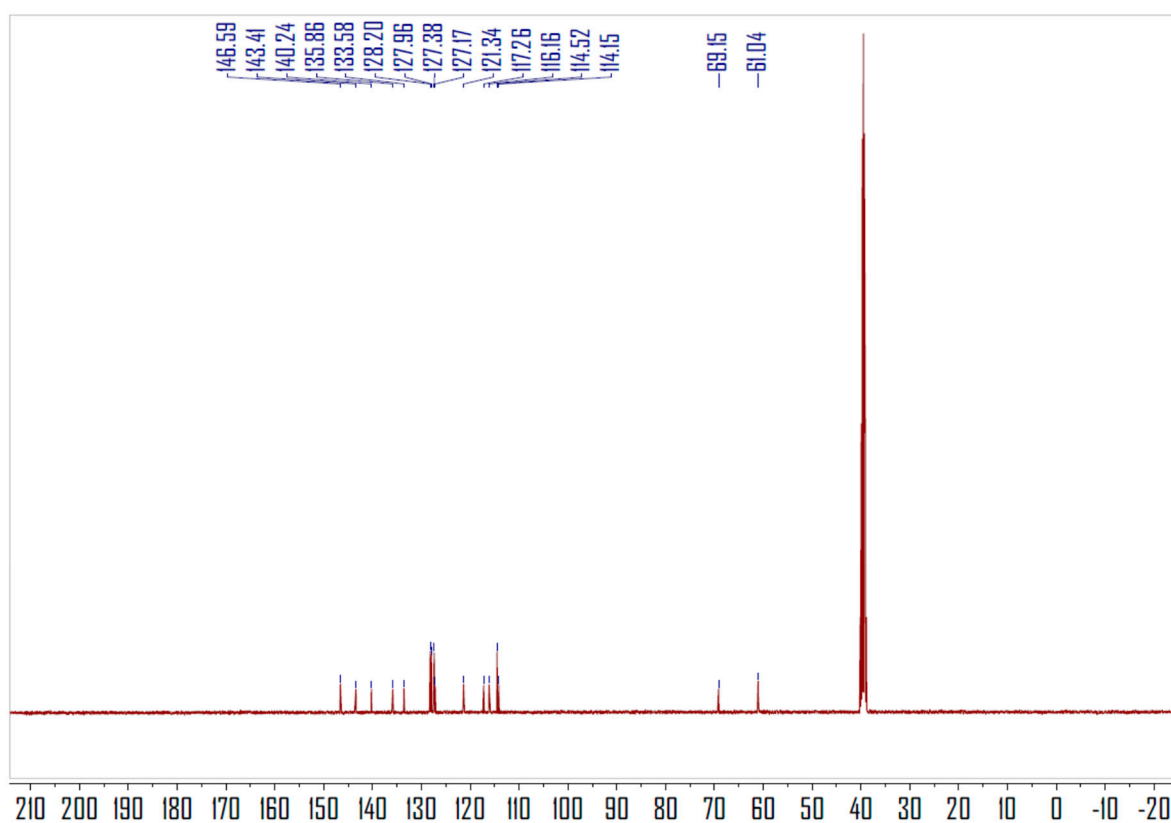



4-(3-(4-methoxyphenyl)-2,3-dihydro-4H-benzo[b][1,4]oxazin-4-yl)aniline (**13b**)

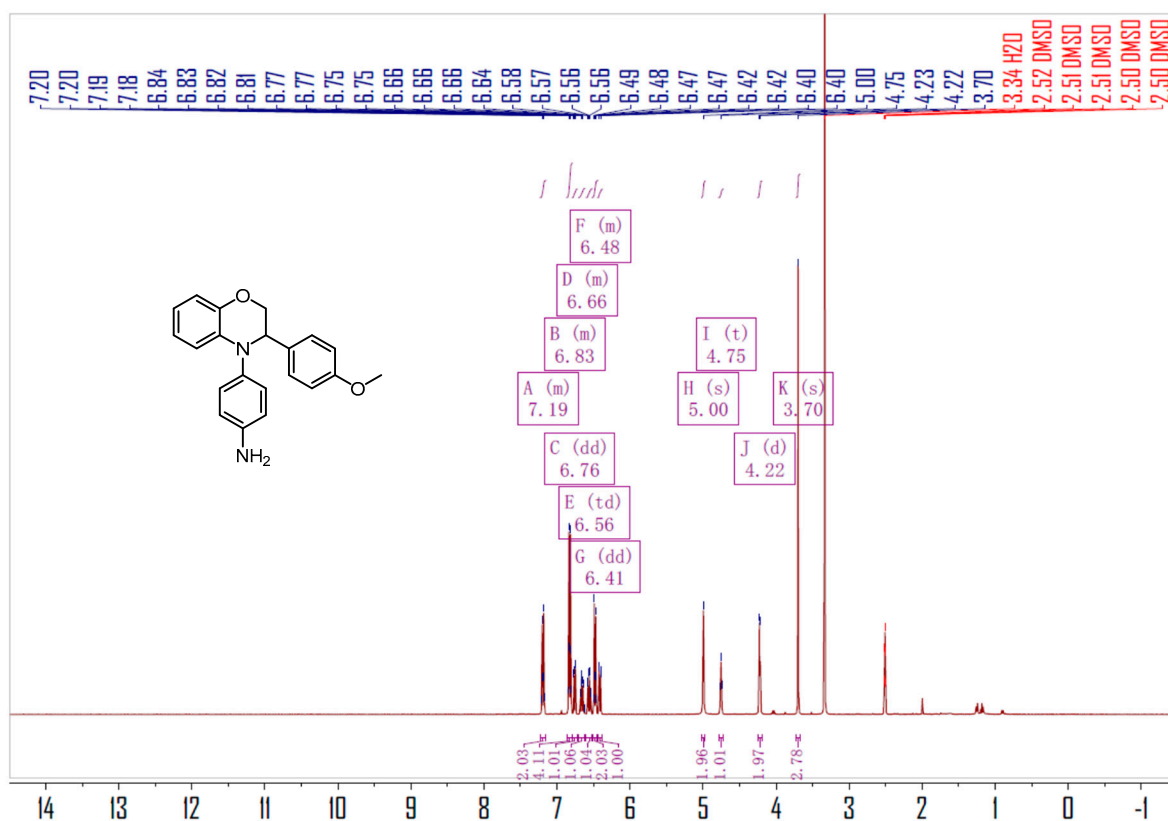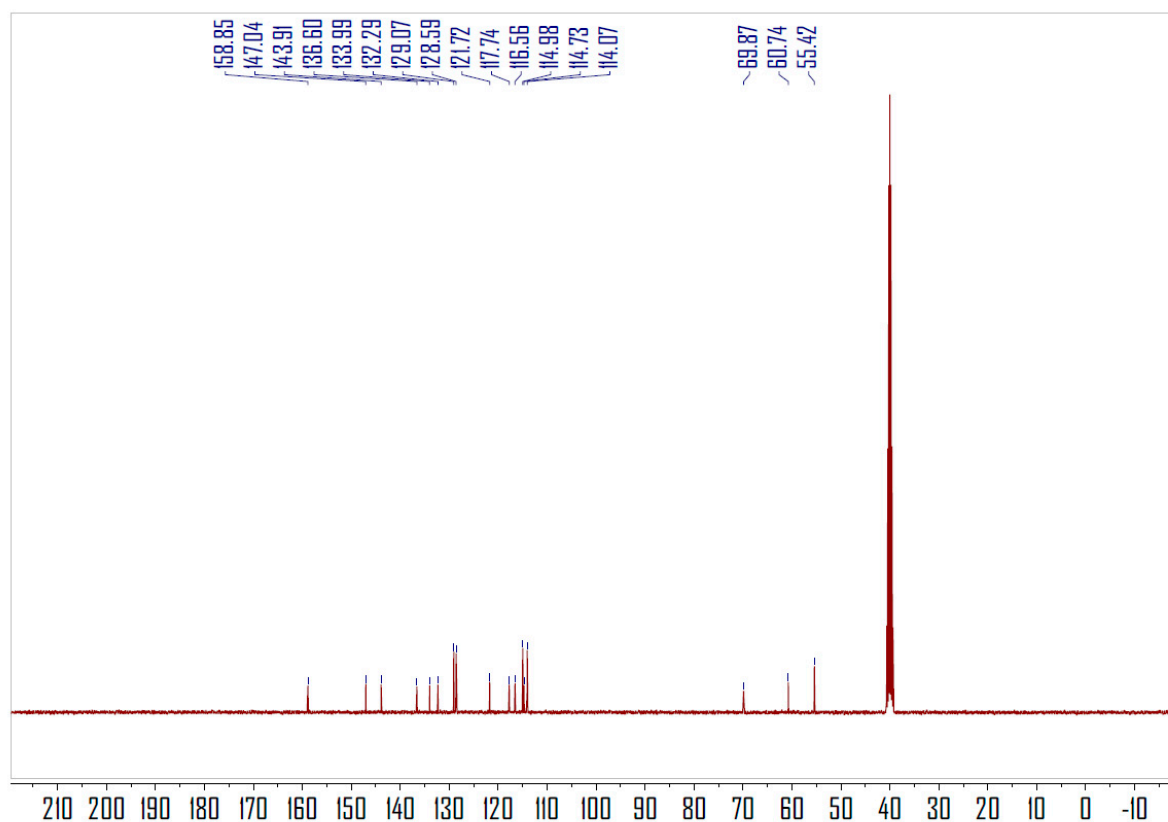

4-(7-methoxy-3-(4-methoxyphenyl)-2,3-dihydro-4H-benzo[b][1,4]oxazin-4-yl)aniline (**13c**)

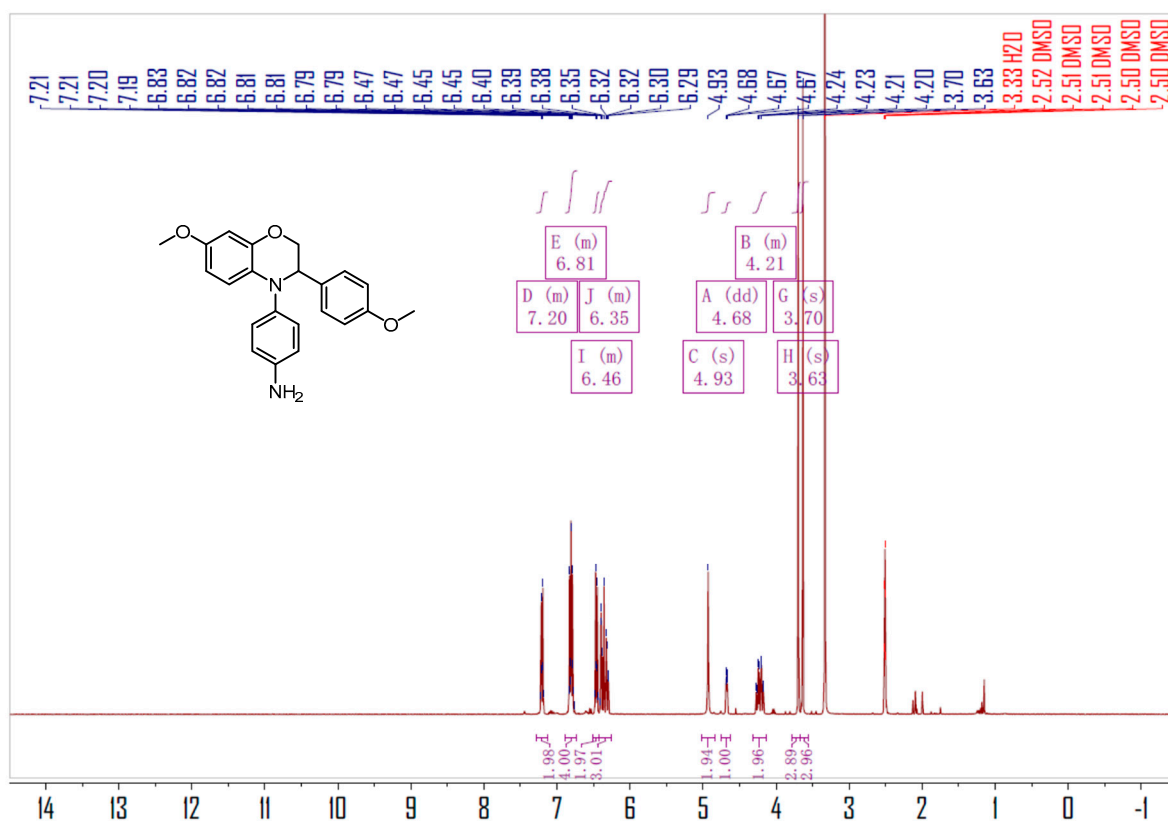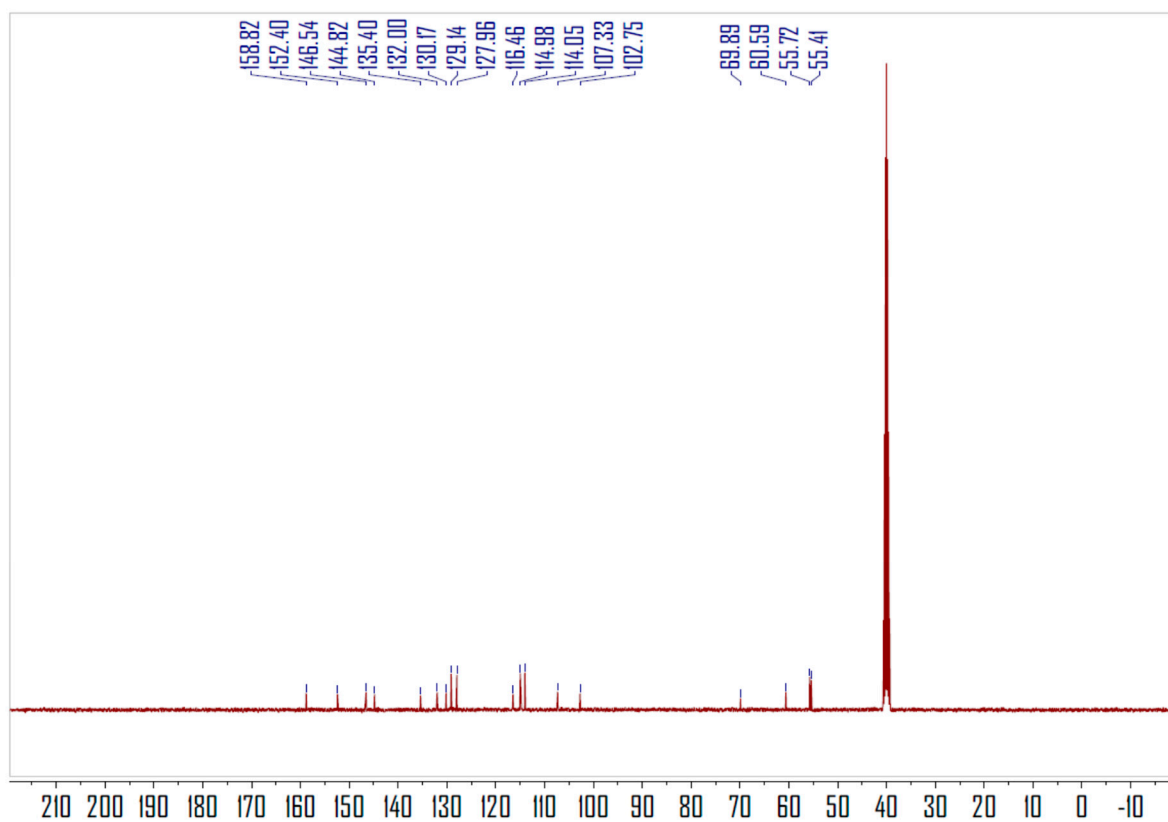

4-(3-(2,4-dimethylphenyl)-7-methoxy-2,3-dihydro-4H-benzo[b][1,4]oxazin-4-yl)aniline (**13d**)

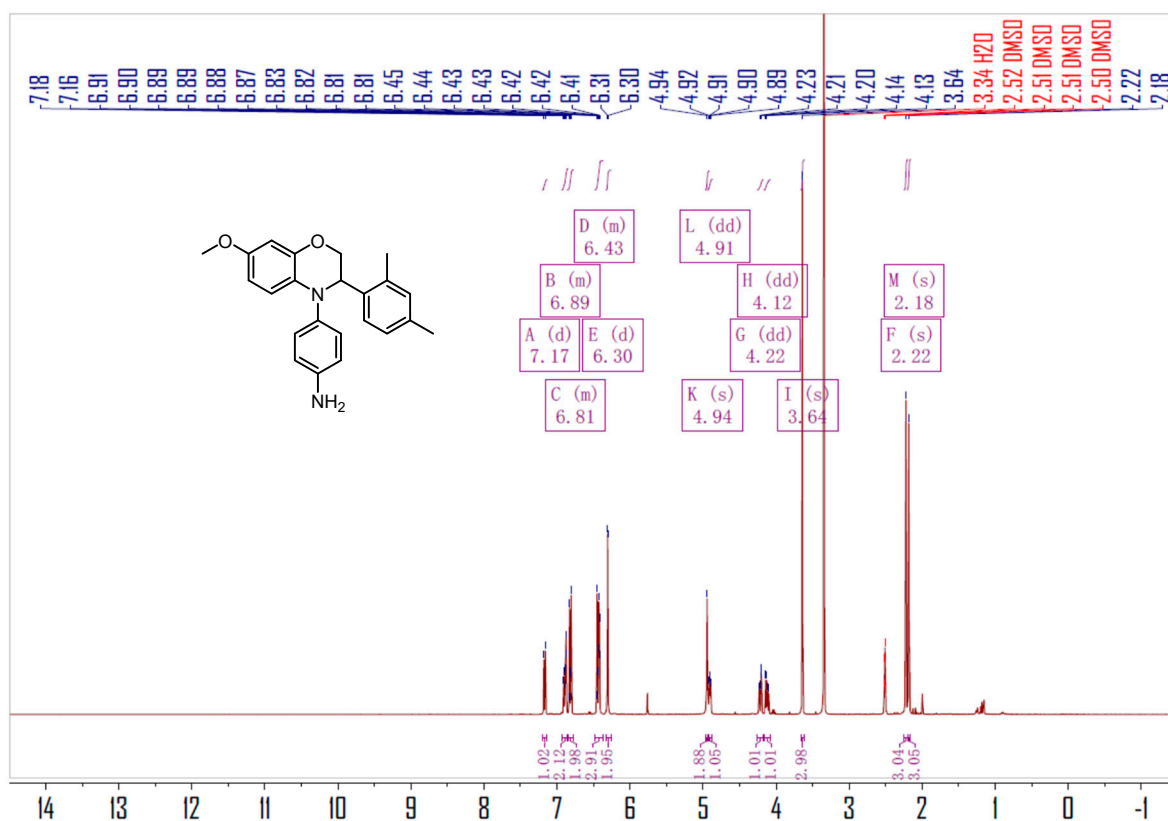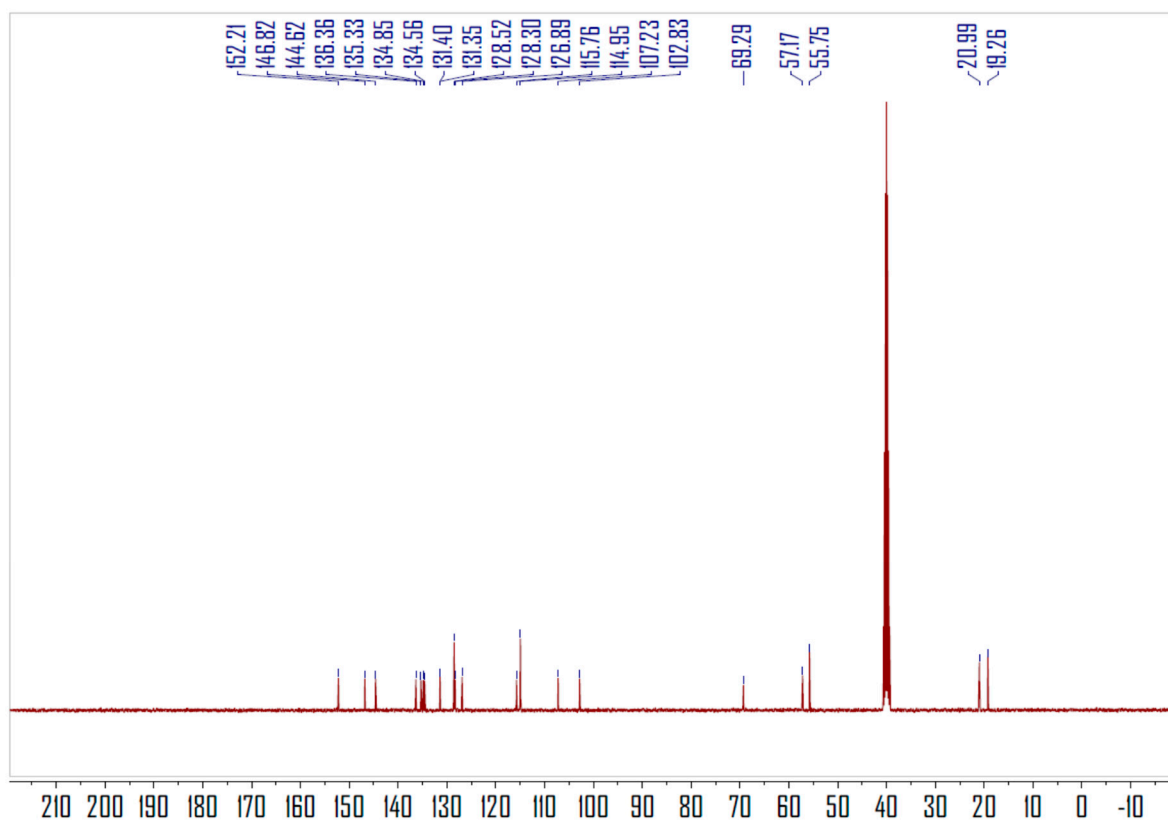

4-(3-(4-fluorophenyl)-7-methoxy-2,3-dihydro-4H-benzo[b][1,4]oxazin-4-yl)aniline (**13e**)

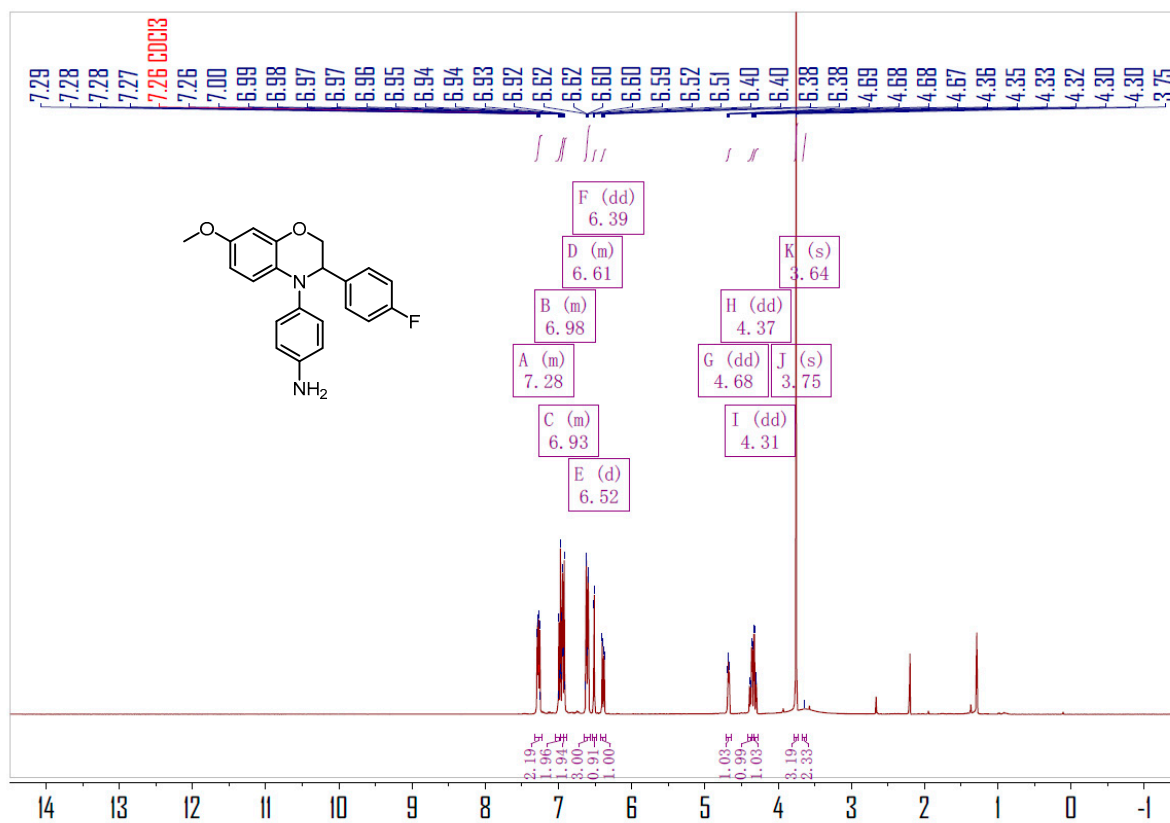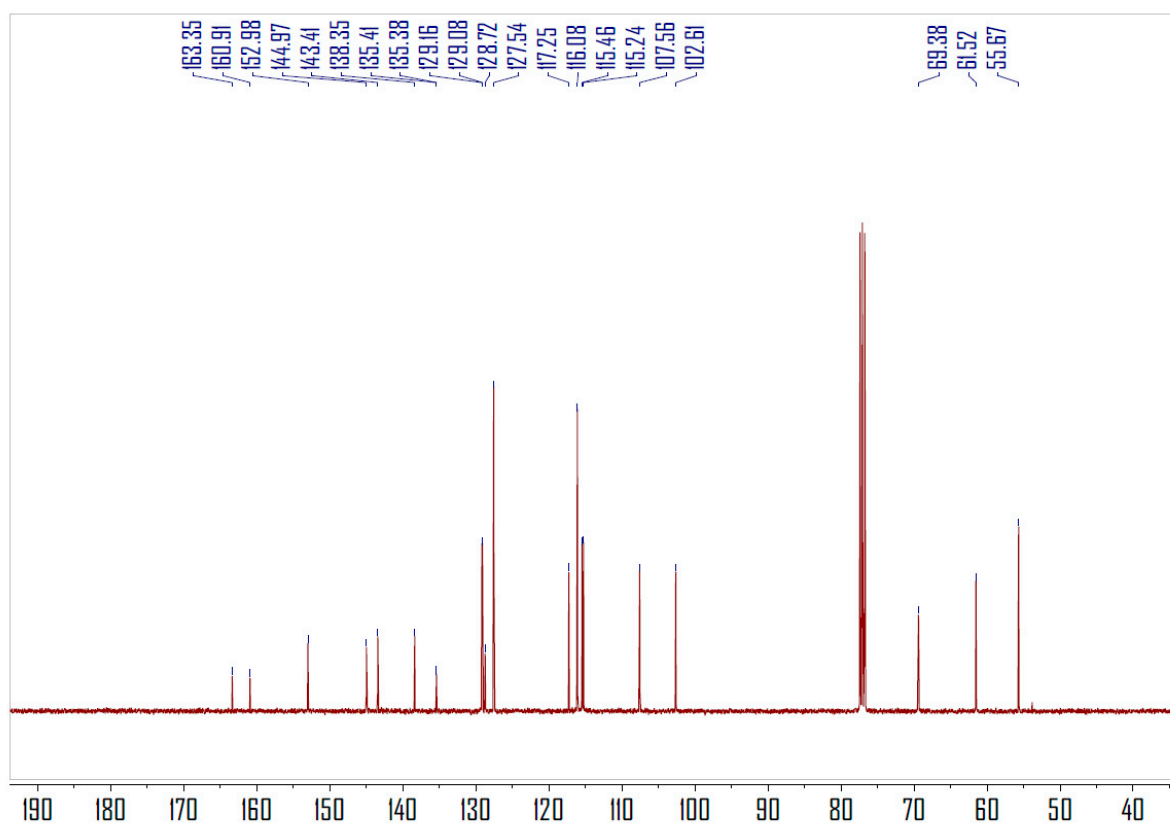

4-(4-phenyl-3,4-dihydro-2H-benzo[b][1,4]oxazin-3-yl)phenol (**14a**)

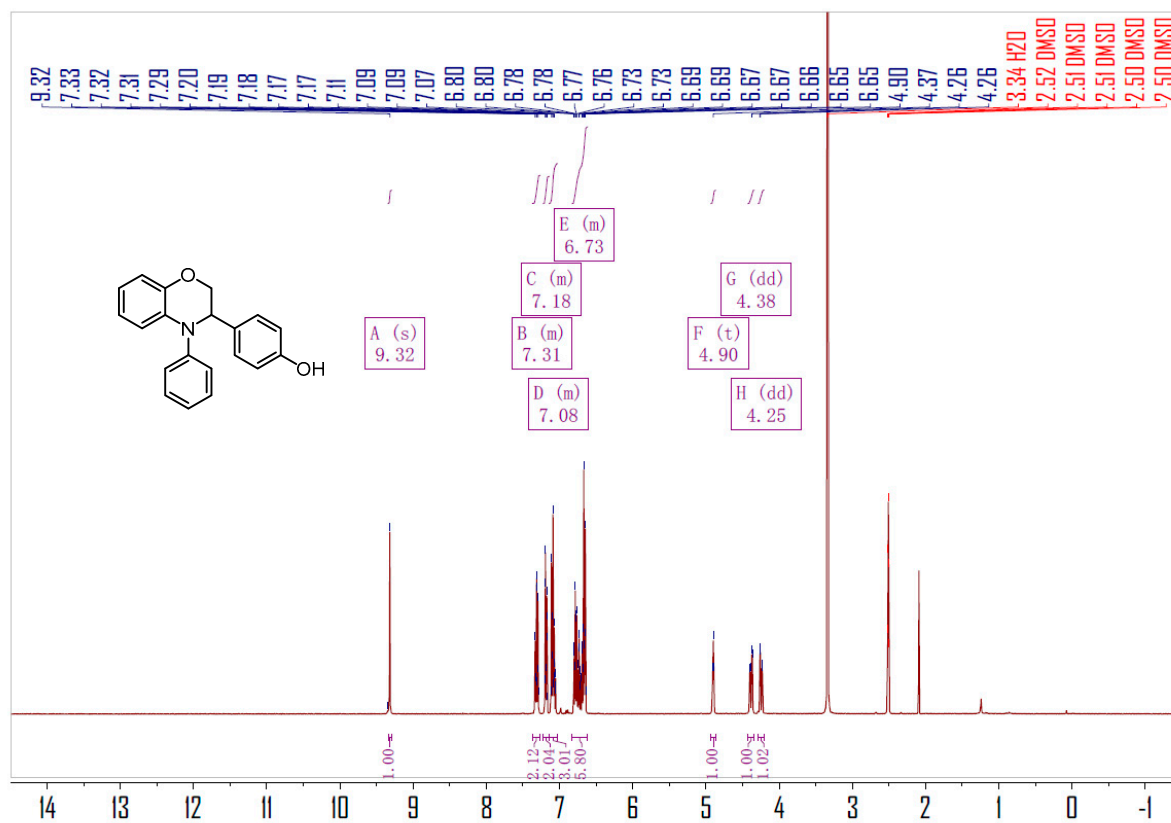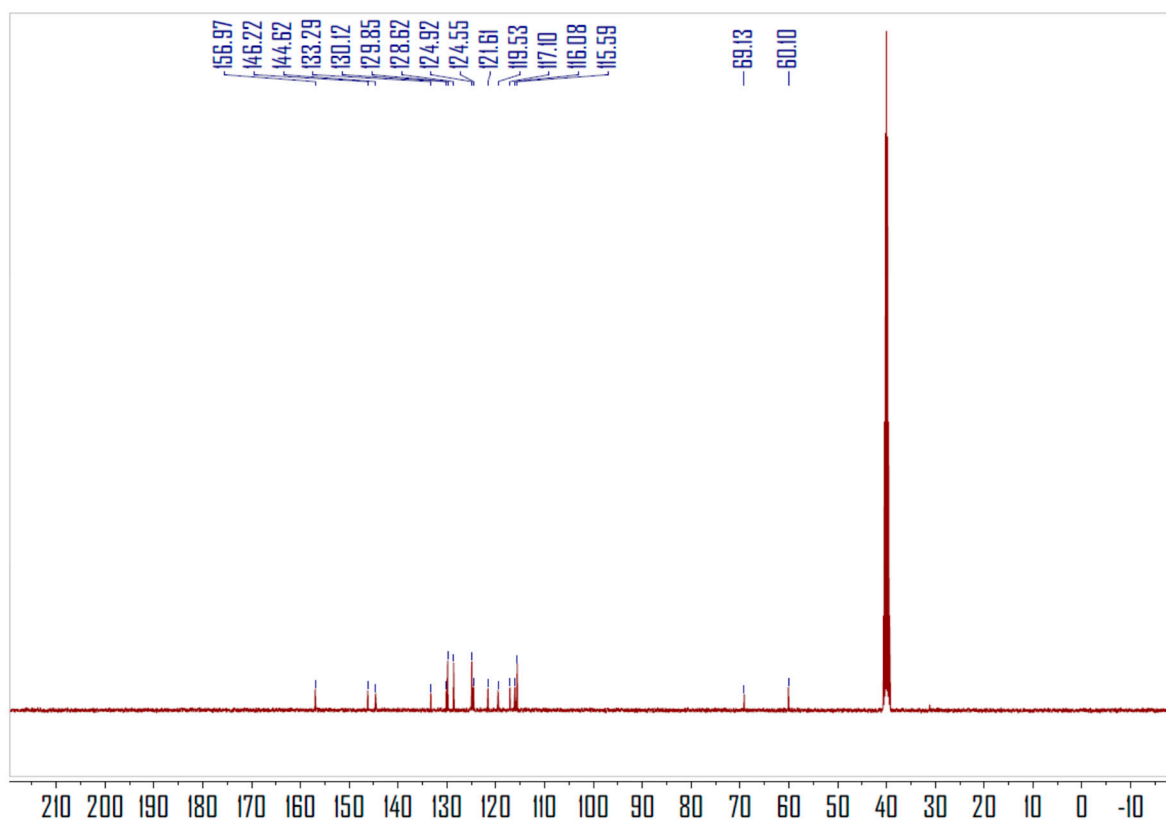

4-(4-(4-aminophenyl)-3,4-dihydro-2H-benzo[b][1,4]oxazin-3-yl)phenol (**14b**)

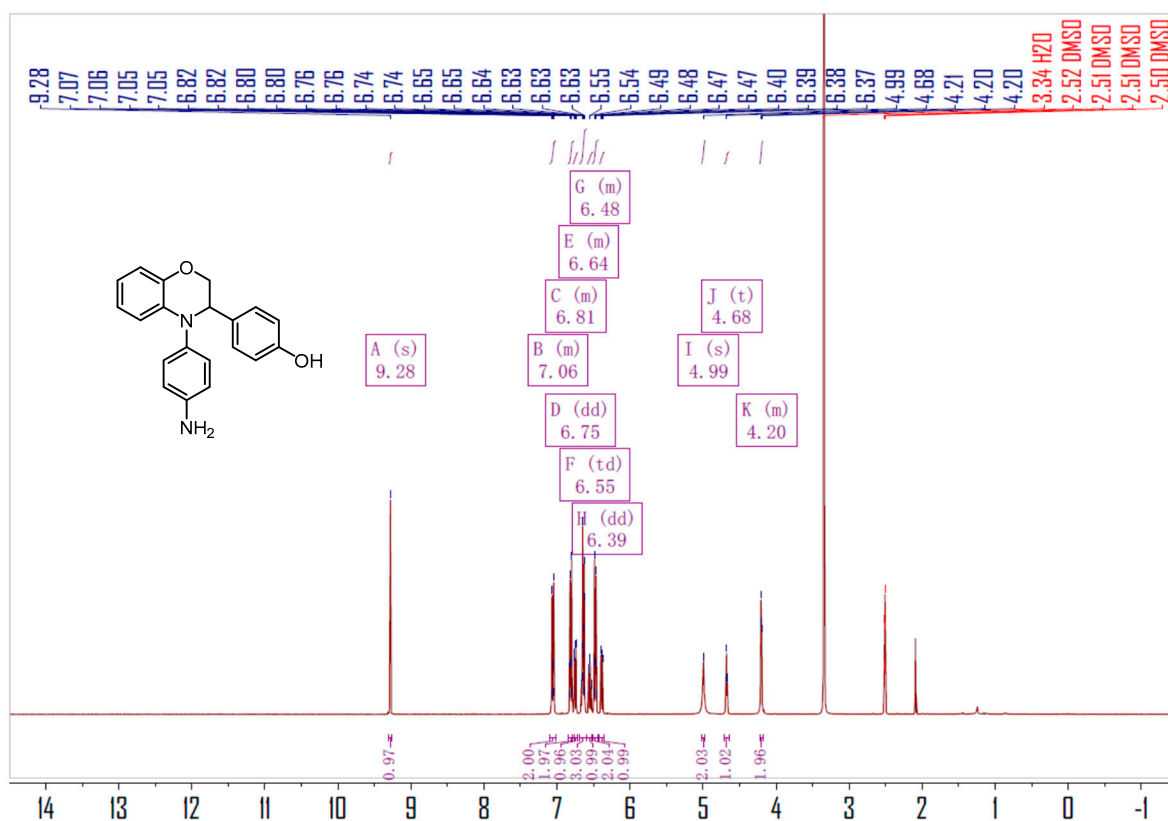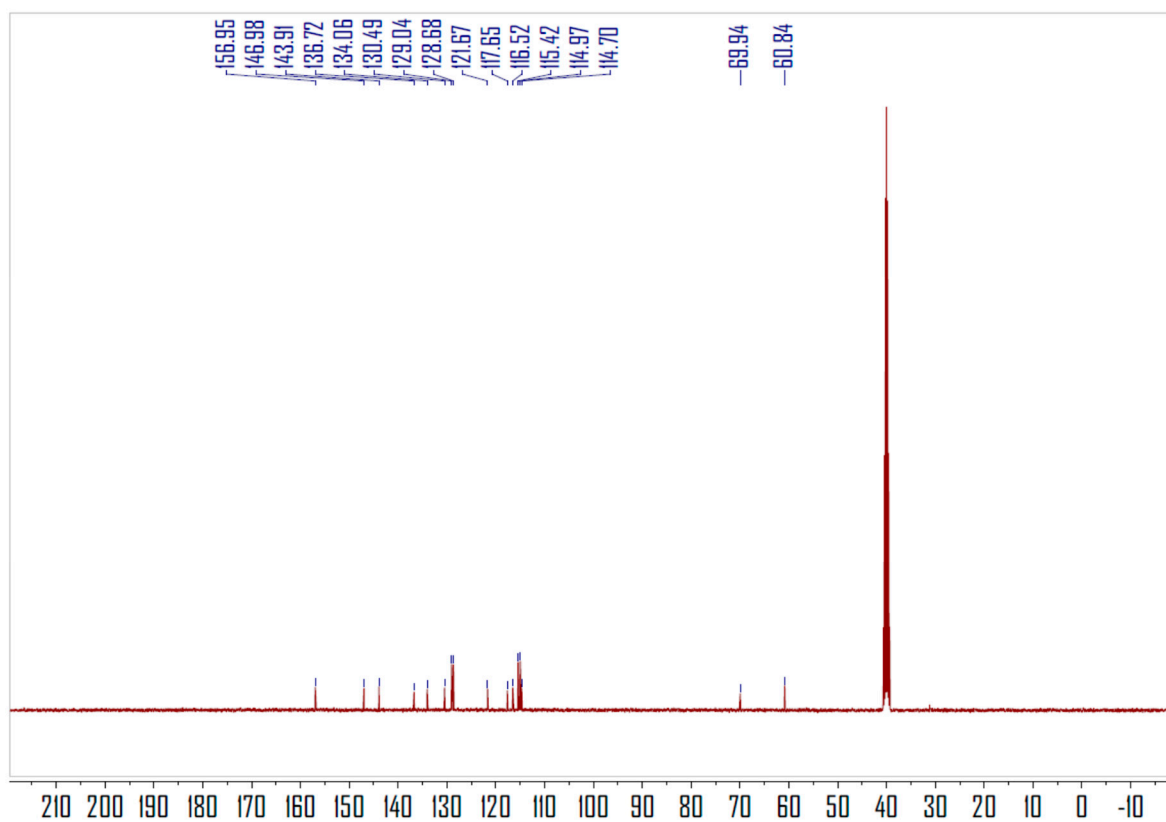

3-(4-hydroxyphenyl)-4-phenyl-3,4-dihydro-2H-benzo[b][1,4]oxazin-7-ol (**14c**)

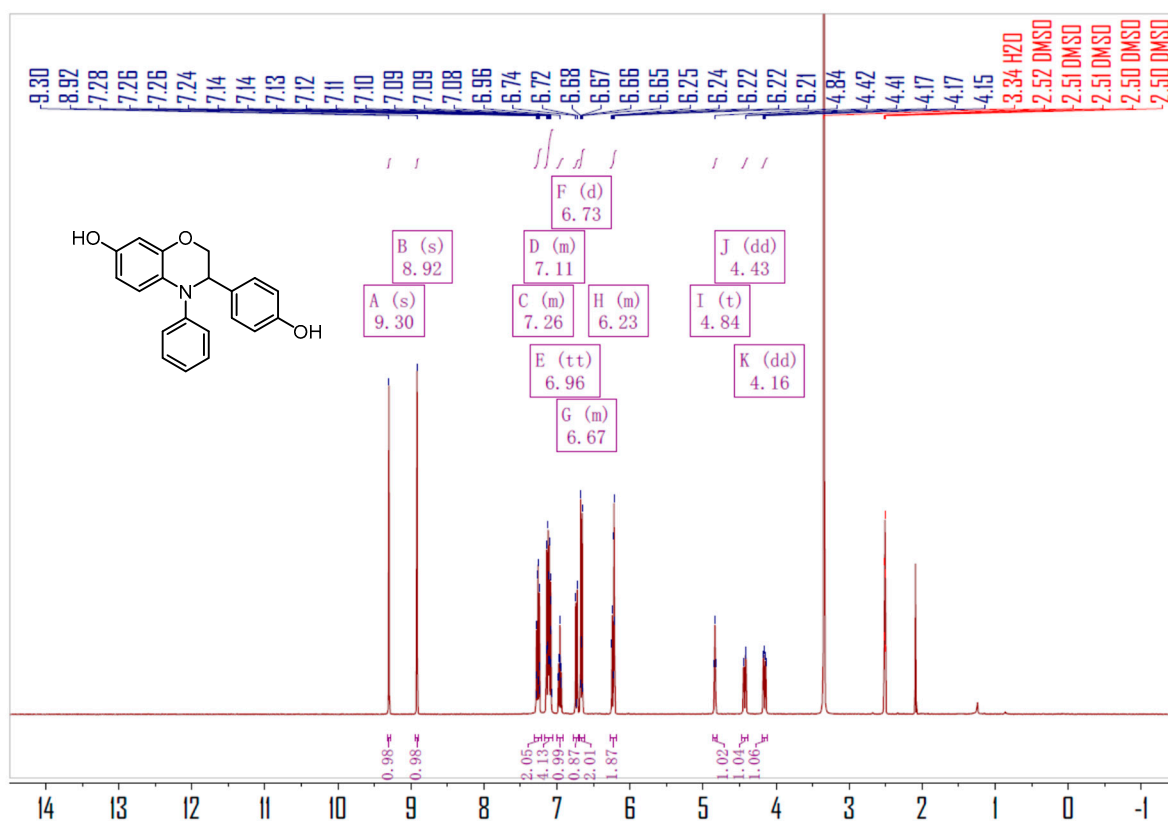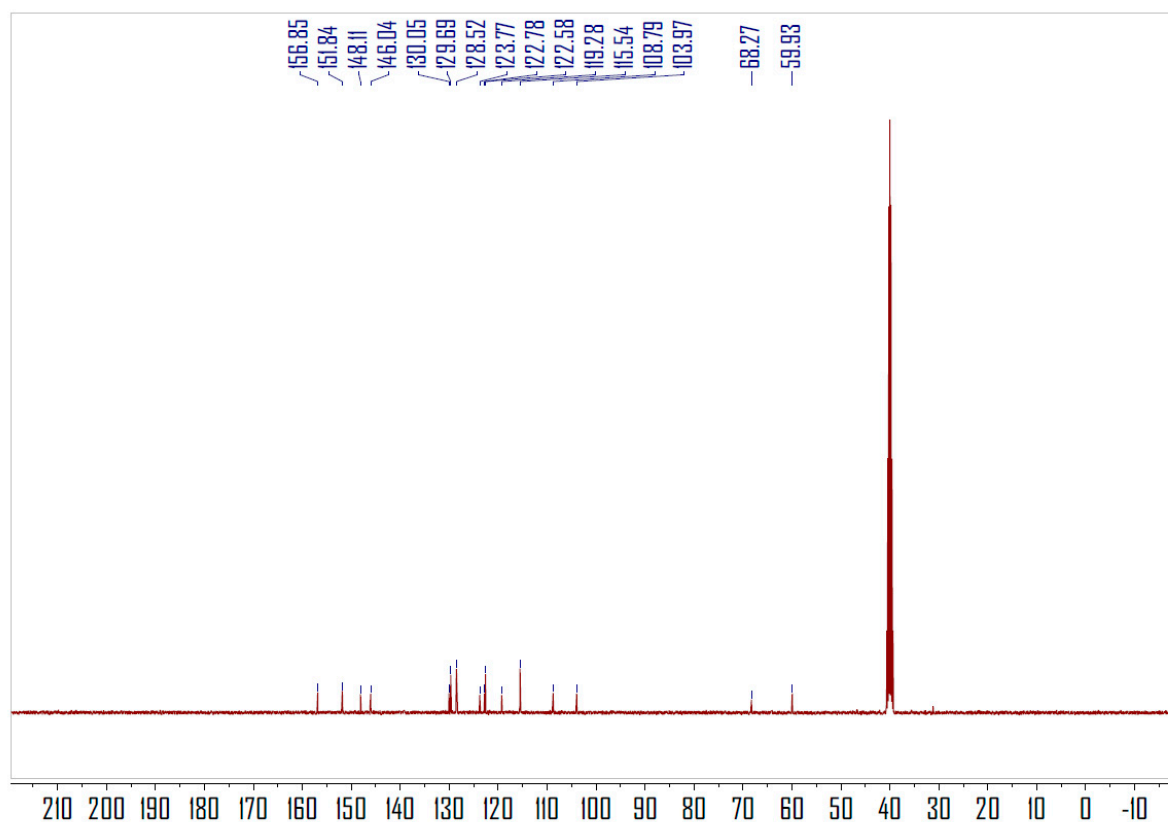

4,4'-(7-hydroxy-2,3-dihydro-4H-benzo[b][1,4]oxazine-3,4-diyl)diphenol (**14d**)

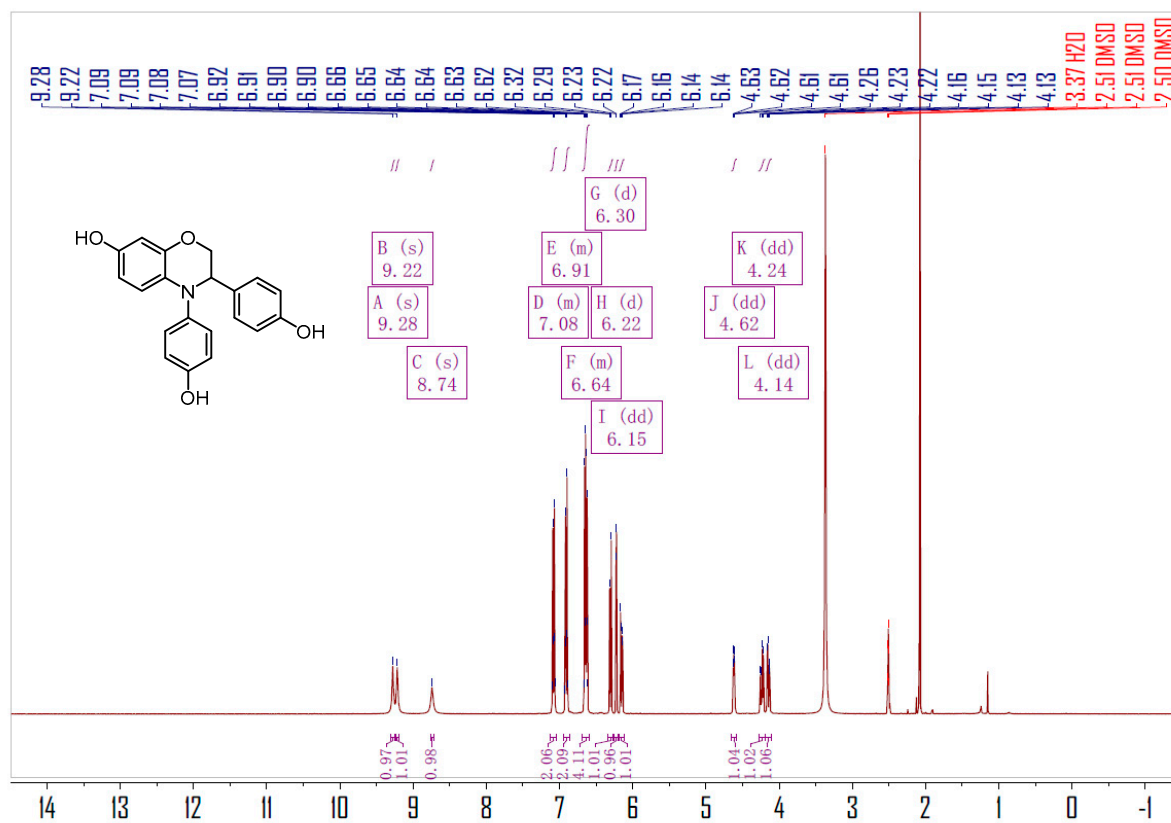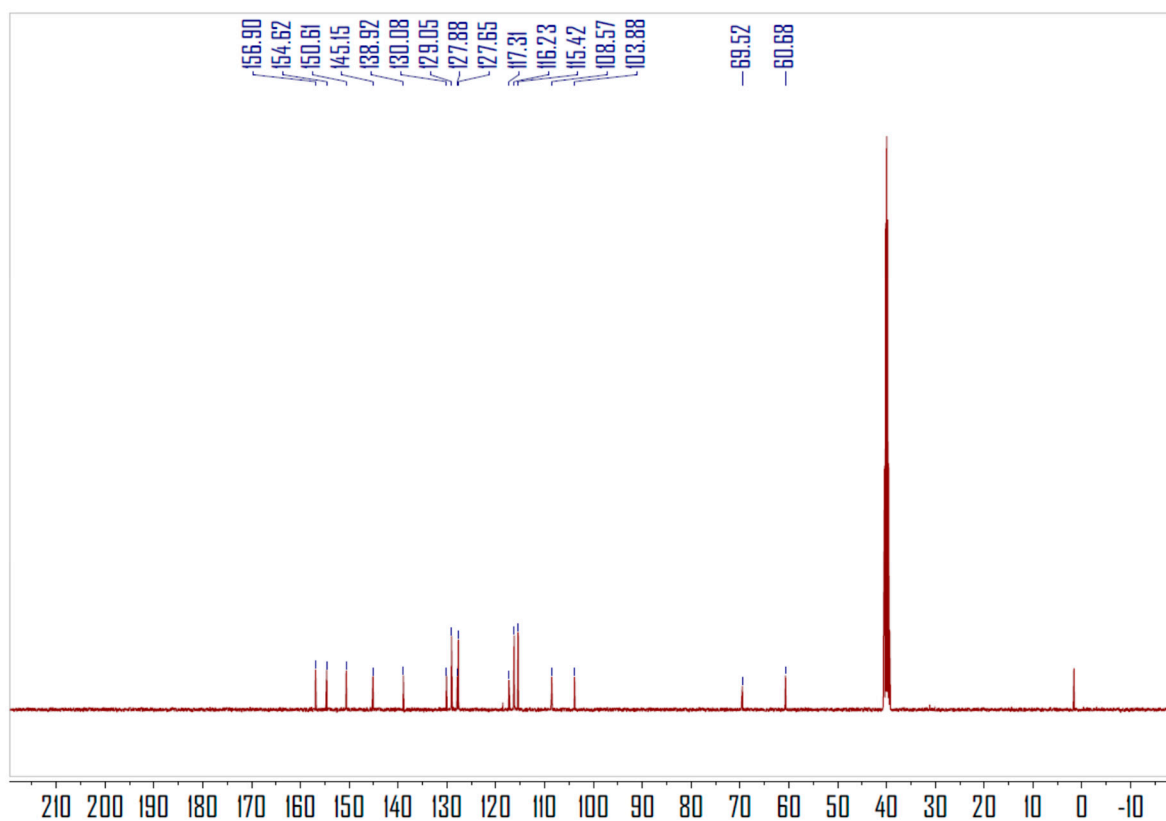



4-(4-aminophenyl)-3-(4-hydroxyphenyl)-3,4-dihydro-2H-benzo[b][1,4]oxazin-7-ol (**14e**)

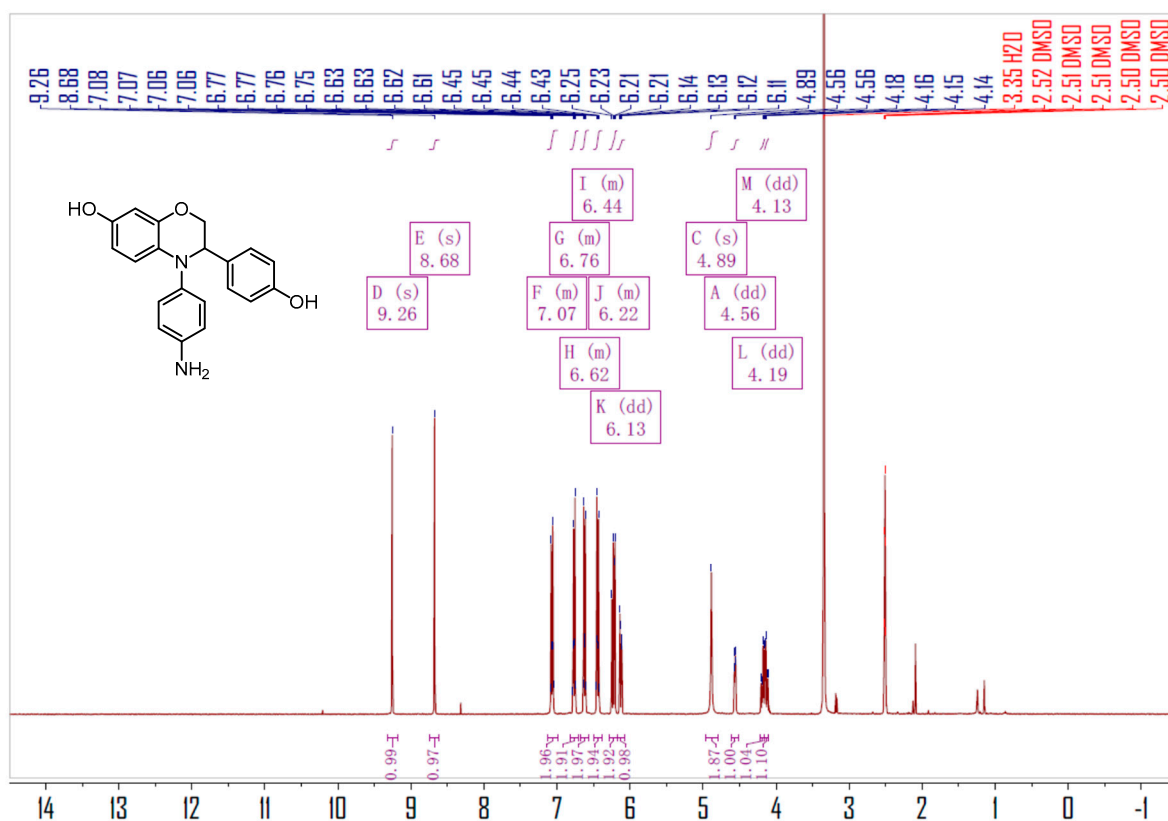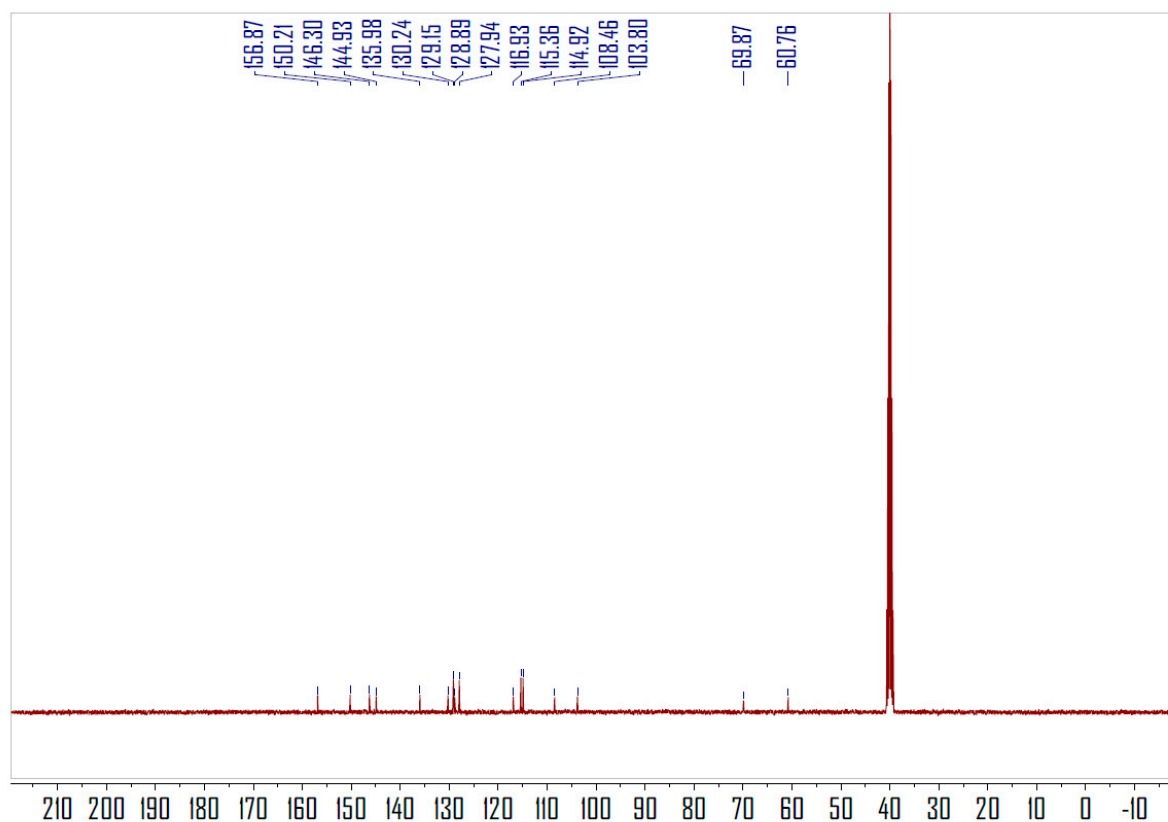

4-(4-aminophenyl)-3-(2,4-dimethylphenyl)-3,4-dihydro-2H-benzo[b][1,4]oxazin-7-ol (**14f**)

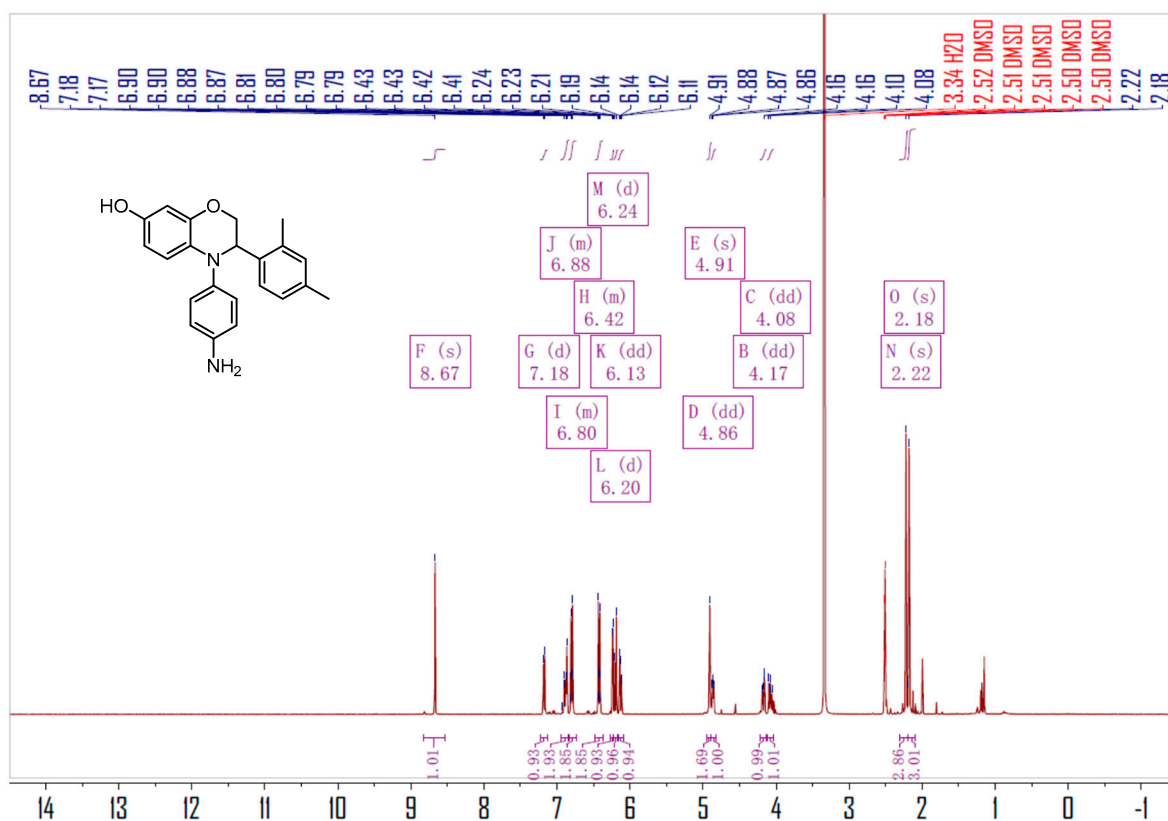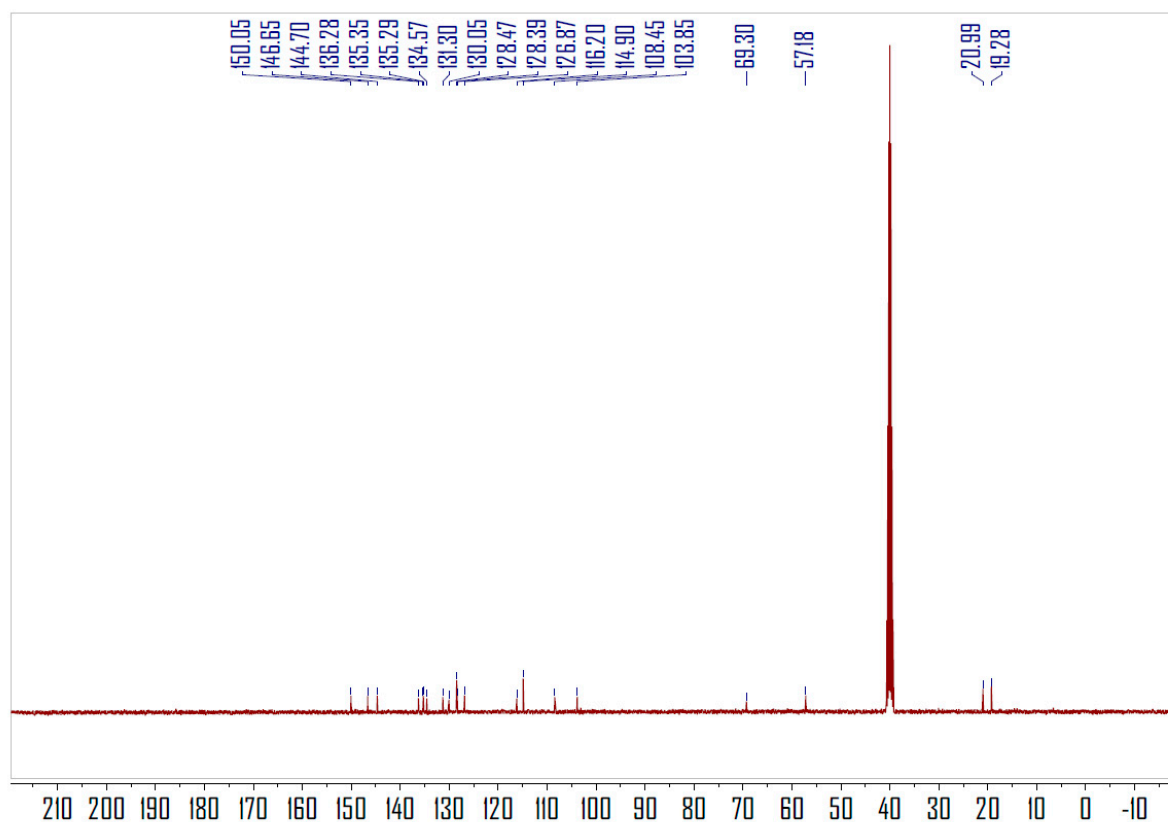

3-(4-fluorophenyl)-4-(4-hydroxyphenyl)-3,4-dihydro-2H-benzo[b][1,4]oxazin-7-ol (**14g**)

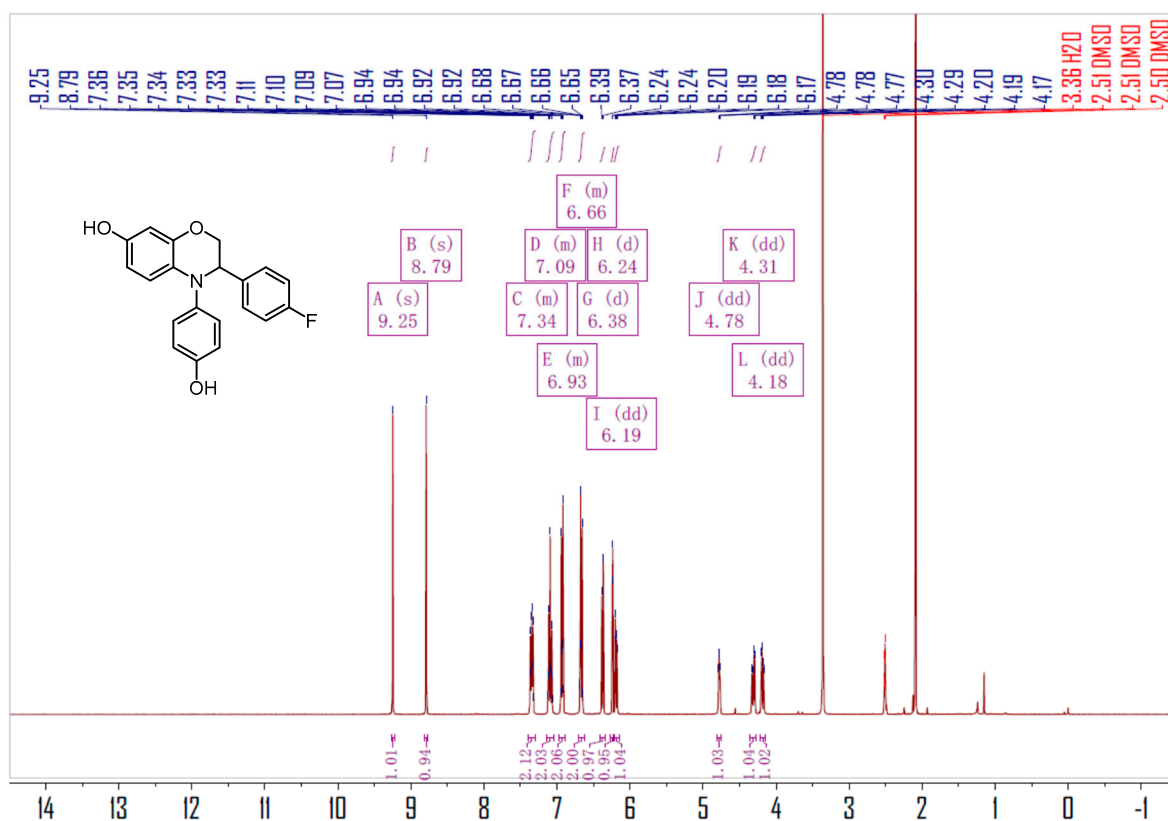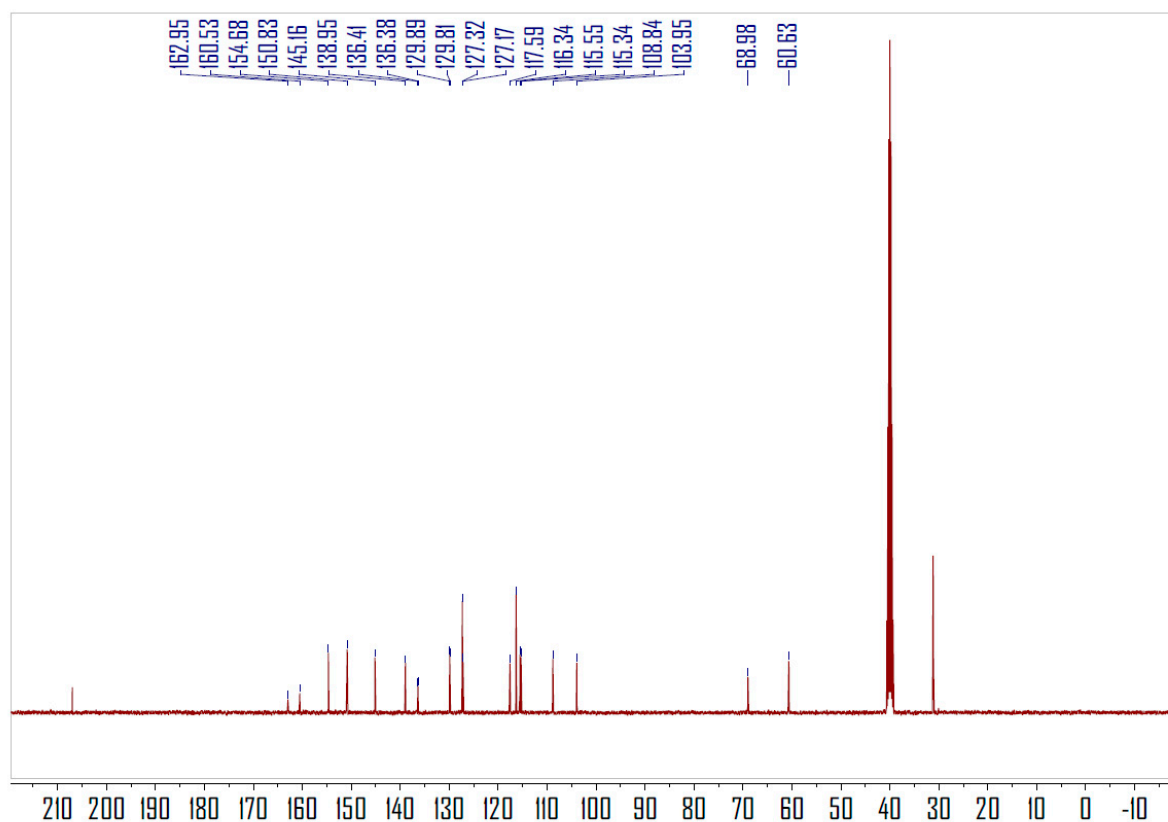

3-(4-fluorophenyl)-4-(quinolin-3-yl)-3,4-dihydro-2H-benzo[b][1,4]oxazin-7-ol (**15c**)

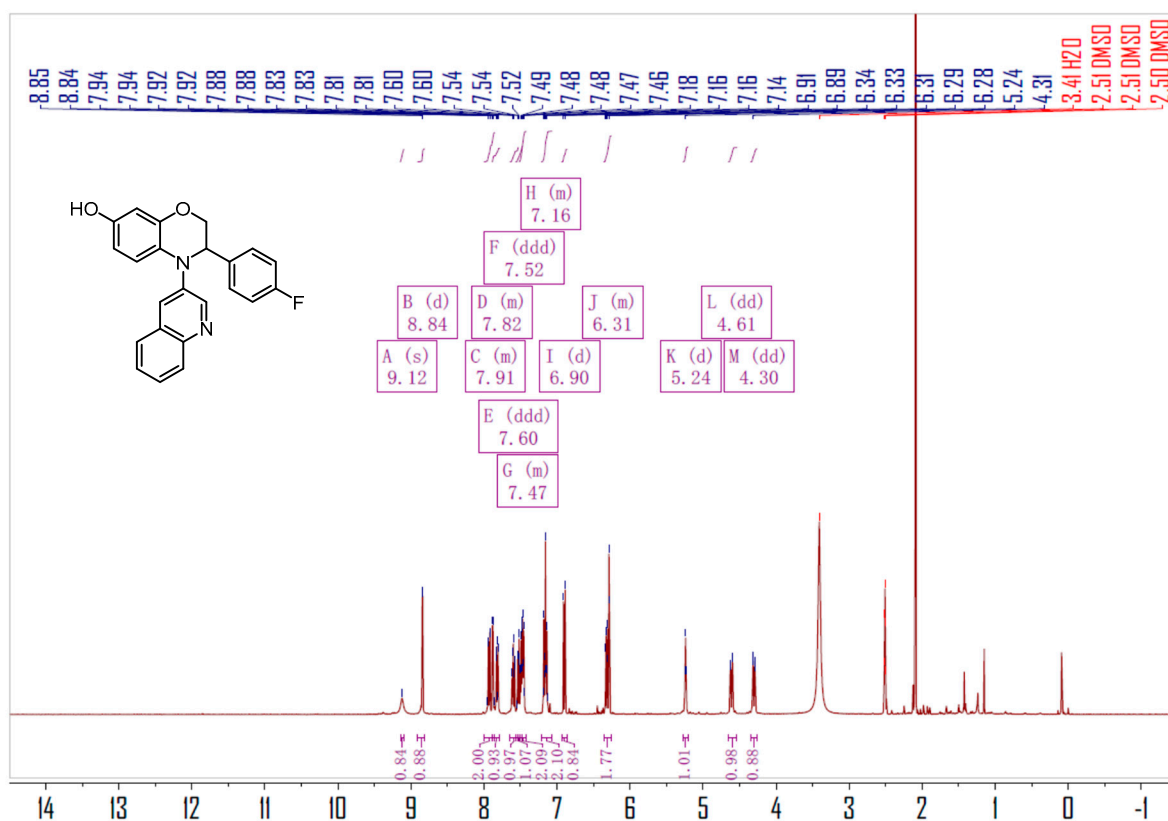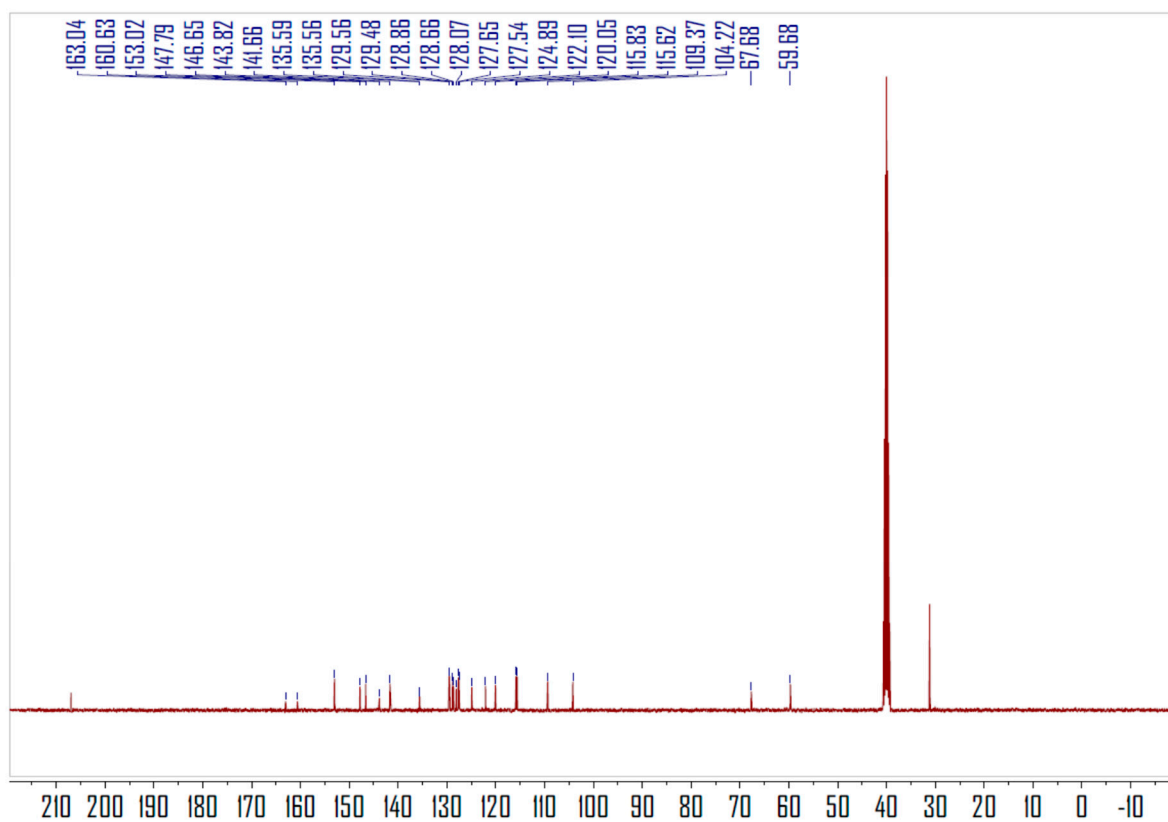

Information about the cell lines.

| Name       | Vendor | Cat#     | Lot. No  | Description                               | Growth properties                                                                      | Complete medium         | Seeding Density | Doubling Time | incubation time |
|------------|--------|----------|----------|-------------------------------------------|----------------------------------------------------------------------------------------|-------------------------|-----------------|---------------|-----------------|
| PC-3       | ATCC   | CRL-1435 | 7348670  | prostate, adenocarcinoma                  | adherent(The cells form clusters in soft agar and can be adapted to suspension growth) | F-12K+10%FBS            | 3200            | 31.37         | <b>72h</b>      |
| MIA PaCa-2 | ATCC   | CRL-1420 | 57866601 | pancreas, pancreatic Carcinoma            | adherent, single cells and loosely attached clusters                                   | DMEM+10%FBS             | 1700            | 21            | <b>72h</b>      |
| MDA-MB-231 | ATCC   | HTB-26   | 4031218  | breast, adenocarcinoma (pleural effusion) | adherent                                                                               | Leibovitz's L-15+10%FBS | 4000            | <b>31</b>     | <b>72h</b>      |
